# Supplementary material for: Modelling geographical accessibility to support disaster response and rehabilitation of a healthcare system: an impact analysis of Cyclones Idai and Kenneth in Mozambique
Source: PubMed Central journal article supplement — BMJ Open. 2020 Nov 3;10(11):e039138. doi: 10.1136/bmjopen-2020-039138 (PMC7640533; doi:10.1136/bmjopen-2020-039138), 2020-11-03

# BMJ Open

BMJ Open is committed to open peer review. As part of this commitment we make the peer review history of every article we publish publicly available.

When an article is published we post the peer reviewers' comments and the authors' responses online. We also post the versions of the paper that were used during peer review. These are the versions that the peer review comments apply to.

The versions of the paper that follow are the versions that were submitted during the peer review process. They are not the versions of record or the final published versions. They should not be cited or distributed as the published version of this manuscript.

BMJ Open is an open access journal and the full, final, typeset and author-corrected version of record of the manuscript is available on our site with no access controls, subscription charges or pay-per-view fees (<http://bmjopen.bmj.com>).

If you have any questions on BMJ Open's open peer review process please email [info.bmjopen@bmj.com](mailto:info.bmjopen@bmj.com)

# BMJ Open

## Modelling geographical accessibility to support disaster response and rehabilitation of a health care system: An impact analysis of Cyclones Idai and Kenneth in Mozambique

|                               |                                                                                                                                                                                                                                                                                                                                                                                                                                                                  |
|-------------------------------|------------------------------------------------------------------------------------------------------------------------------------------------------------------------------------------------------------------------------------------------------------------------------------------------------------------------------------------------------------------------------------------------------------------------------------------------------------------|
| Journal:                      | <i>BMJ Open</i>                                                                                                                                                                                                                                                                                                                                                                                                                                                  |
| Manuscript ID                 | bmjopen-2020-039138                                                                                                                                                                                                                                                                                                                                                                                                                                              |
| Article Type:                 | Original research                                                                                                                                                                                                                                                                                                                                                                                                                                                |
| Date Submitted by the Author: | 05-Apr-2020                                                                                                                                                                                                                                                                                                                                                                                                                                                      |
| Complete List of Authors:     | Hierink, Fleur; University of Geneva, Institute of Global Health; University of Geneva, Institute for Environmental Sciences<br>Rodrigues, Nelson; UNICEF Mozambique<br>Muñiz, Maria; United Nations Childrens Fund, Eastern and Southern Africa Regional Office<br>Panciera, Rocco; United Nations Childrens Fund, Health Section<br>Ray, Nicolas; University of Geneva, Institute of Global Health; University of Geneva, Institute for Environmental Sciences |
| Keywords:                     | International health services < HEALTH SERVICES ADMINISTRATION & MANAGEMENT, Organisation of health services < HEALTH SERVICES ADMINISTRATION & MANAGEMENT, Geographical mapping < TROPICAL MEDICINE, Risk management < HEALTH SERVICES ADMINISTRATION & MANAGEMENT                                                                                                                                                                                              |
|                               |                                                                                                                                                                                                                                                                                                                                                                                                                                                                  |

SCHOLARONE™  
Manuscripts

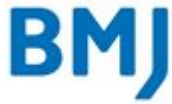

I, the Submitting Author has the right to grant and does grant on behalf of all authors of the Work (as defined in the below author licence), an exclusive licence and/or a non-exclusive licence for contributions from authors who are: i) UK Crown employees; ii) where BMJ has agreed a CC-BY licence shall apply, and/or iii) in accordance with the terms applicable for US Federal Government officers or employees acting as part of their official duties; on a worldwide, perpetual, irrevocable, royalty-free basis to BMJ Publishing Group Ltd ("BMJ") its licensees and where the relevant Journal is co-owned by BMJ to the co-owners of the Journal, to publish the Work in this journal and any other BMJ products and to exploit all rights, as set out in our [licence](#).

The Submitting Author accepts and understands that any supply made under these terms is made by BMJ to the Submitting Author unless you are acting as an employee on behalf of your employer or a postgraduate student of an affiliated institution which is paying any applicable article publishing charge ("APC") for Open Access articles. Where the Submitting Author wishes to make the Work available on an Open Access basis (and intends to pay the relevant APC), the terms of reuse of such Open Access shall be governed by a Creative Commons licence – details of these licences and which [Creative Commons](#) licence will apply to this Work are set out in our licence referred to above.

Other than as permitted in any relevant BMJ Author's Self Archiving Policies, I confirm this Work has not been accepted for publication elsewhere, is not being considered for publication elsewhere and does not duplicate material already published. I confirm all authors consent to publication of this Work and authorise the granting of this licence.

1  
2  
3  
4  
5  
6  
7  
8  
9  
10  
11  
12  
13  
14  
15  
16  
17  
18  
19  
20  
21  
22  
23  
24  
25  
26  
27  
28  
29  
30  
31  
32  
33  
34  
35  
36  
37  
38  
39  
40  
41  
42  
43  
44  
45  
46  
47  
48  
49  
50  
51  
52  
53  
54  
55  
56  
57  
58  
59  
60

## Modelling geographical accessibility to support disaster response and rehabilitation of a health care system:

### *An impact analysis of Cyclones Idai and Kenneth in Mozambique*

Fleur Hierink<sup>1,2</sup>, Nelson Rodrigues<sup>3</sup>, Maria Muñiz<sup>4</sup>, Rocco Panciera<sup>5</sup>, Nicolas Ray<sup>1,2</sup>

1. Institute of Global Health, Faculty of Medicine, University of Geneva, Geneva, Switzerland

2. Institute for Environmental Sciences, University of Geneva, Geneva, Switzerland

3. The United Nations Children's Fund Mozambique, Maputo, Mozambique

4. The United Nations Children's Fund, Eastern and Southern Africa Regional Office, Nairobi Kenya

5. Health section, The United Nations Children's Fund, New York, United States of America

#### **CORRESPONDENCE:**

Fleur Hierink

[fleur.hierink@unige.ch](mailto:fleur.hierink@unige.ch)

GeoHealth group

Institute for Environmental Sciences

Office B401, UNI CARLVOGT

66 Bd Carl Vogt, 1205 Geneva

Switzerland

#### **KEYWORDS:**

International health services, organisation of health services, geographical mapping, risk management



## 32 **Conclusion**

33 Post-disaster accessibility modelling can increase understanding of spatial differences in  
34 geographic access to care in the direct aftermath of a disaster and can inform targeting and  
35 prioritization of limited resources. Our results reflect opportunities for integrating  
36 accessibility modelling in early disaster response, and to inform discussions on health  
37 system recovery, mitigation and preparedness.

38

## 39 **STRENGTHS AND LIMITATIONS OF THIS STUDY**

40

- 41 • This is the first study presenting the applicability of post-disaster geographical  
42 accessibility modelling.
- 43 • The approach enables quantification of disaster impacts on geographical health care  
44 accessibility to prioritize post-disaster interventions and to build resilience for future  
45 disasters.
- 46 • To account for uncertainty of the assumed travel speeds, we considered multiple  
47 possible scenarios.
- 48 • Data from various sources were combined to represent the post-cyclone situation as  
49 realistically as possible, but since data gathering was ongoing, it was expected that  
50 some data were incomplete or not fully processed at the time of usage.
- 51 • Our accessibility modelling assumes that patients always travel to the nearest health  
52 facility. However, literature has shown that patients sometimes bypass health  
53 facilities in search of higher quality care in Mozambique

54

## 1. INTRODUCTION

Geographical proximity to health facilities is a crucial aspect of accessibility, utilization and the provision of health services to populations in need<sup>1</sup>. Road networks and natural barriers (such as rivers, water bodies, and flooded areas) are important factors that determine the geographical (i.e. physical) accessibility of a population to the network of functional health facilities. During natural disasters, roads and health facilities are often damaged, yet health care demand rises substantially at the same time due to injuries and increased communicable disease risks<sup>2,3</sup>. The interplay between the disruption of health infrastructure, transport network, and the rise in health care demand, is expected to disable a large portion of the population's access to care they need in the aftermath of a disaster<sup>3,4</sup>. This is especially the case in already medically underserved regions, where the event can lead to new health disparities or exacerbate existing ones<sup>2</sup>.

In March and April 2019, two cyclones made landfall in Mozambique. This was the first time in history that two strong cyclones hit Mozambique consecutively in the same season<sup>5</sup>. On 14 March 2019 Tropical Cyclone Idai made landfall in Beira, followed by a week of heavy rains and winds, the storm ended on 21 March 2019<sup>6</sup>. In the middle of the humanitarian emergency response for Cyclone Idai, a second cyclone hit Northern Mozambique. Cyclone Kenneth, a category 4 cyclone and the strongest recorded cyclone on the African continent, made landfall in Pemba, Cabo Delgado on 25 April 2019<sup>7,8</sup>. The two cyclones combined had a death toll of 648 (603 fatalities due to Idai and 45 deaths caused by Kenneth) and left over 2.2 million people in need of humanitarian assistance<sup>5</sup>. The cyclone's destruction left entire communities isolated for weeks due to flood waters, destroyed telecommunication networks, and extensive road damage<sup>9,10</sup>. In addition, stagnant waters, inaccessibility to safe water and sanitation, and overcrowding in temporary accommodation led to a cholera outbreak and a significant increase in malaria cases<sup>5,8,11,12</sup>. Major damage to 113 health facilities were reported after both cyclones, causing severe disruption in health service provision and restricting the population's access to adequate health care<sup>13,14</sup>.

Cyclones impact entire populations, however the burden disproportionately affects children and women<sup>15</sup>. It is estimated that for cyclones Idai and Kenneth more than 50% of the affected population were children, and with flood waters rising above 6 meters, their

1  
2  
3 87 movements to safety and health care were particularly limited <sup>5</sup>. Geographic inaccessibility  
4  
5 88 to health facilities can interrupt childhood immunization, or prevent receipt of treatment for  
6  
7 89 injuries <sup>16,17</sup>.  
8  
9 90

10 91 Although many humanitarian actors have estimated substantial losses in health care  
11  
12 92 accessibility and availability <sup>5,9,10,13,18</sup>, the quantitative impact of Cyclone Idai and Kenneth  
13  
14 93 on geographical accessibility to health care for children under the age of 5 across the most  
15  
16 94 affected districts in Mozambique remains unknown. Modelling physical accessibility and  
17  
18 95 population coverage by means of travel time to health facilities, can give important insights  
19  
20 96 for targeting humanitarian action and preparing for future disasters in a coordinated  
21  
22 97 manner <sup>19</sup>. International efforts to support humanitarian responses on the ground have  
23  
24 98 accelerated data gathering in the country, enabling post-disaster accessibility modelling by  
25  
26 99 means of health facility damages, loss of road access, and barriers to movement such as  
27 100 flood waters <sup>20</sup>.  
28  
29 101

30 102 Currently, quantitative post-disaster accessibility assessments are not a part of standardized  
31  
32 103 response guidelines, preventing coordinated and centralized decision making on temporary  
33  
34 104 facility location to serve beneficiaries in the most optimal way <sup>19</sup>. Since humanitarian actors  
35  
36 105 often have to deal with limited resources, informed decision making on temporary facility  
37  
38 106 locations and prioritization of health facility rehabilitation can prevent duplicated action and  
39  
40 107 therefore enhances both financial and operational efficiency <sup>21,22</sup>.  
41  
42 108

43 109 This study presents a data processing and spatial accessibility modelling method to assess  
44  
45 110 post-disaster accessibility to health facilities and analyze population coverage losses as a  
46  
47 111 result of the disaster. The approach enables quantification of disaster impacts on  
48  
49 112 geographical health care accessibility to prioritize post-disaster interventions and to build  
50  
51 113 resilience for future disasters. This is the first study presenting the applicability of post-  
52  
53 114 disaster geographical accessibility modelling.  
54  
55 115  
56 116



## 117 2. METHODS

### 118 2.1 Overall methodology

119 In this study, accessibility is measured as the travel time to health facilities and coverage is  
 120 defined as the number or percentage of people covered or located within a travel time  
 121 catchment area<sup>23</sup>. To model accessibility to health facilities, we consider topography, road  
 122 networks, constraints to movement (e.g. rivers, lakes and flood extent), target population  
 123 distribution, and the locations of functional health facilities. We accessed and prepared  
 124 multiple data layers (Table 1) assembled in the aftermath of Cyclone Idai and Kenneth,  
 125 between April 2019 and September 2019. A total of three scenarios were prepared,  
 126 representing 1) pre-Idai and pre-Kenneth, 2) post-Idai, and 3) post-Kenneth situations. We  
 127 modeled population travel time to the nearest health facility and population coverage, for  
 128 two cyclone-affected regions.

130 **Table 1** – Overview of data layers and data sources

| Layer name                  | Source <sup>a</sup>                | Source date <sup>b</sup>  | Download date | Type     | Original resolution |
|-----------------------------|------------------------------------|---------------------------|---------------|----------|---------------------|
| Administrative boundaries   | INE & UN-OCHA ROSEA (HDX)          | 02.04.19                  | 31.07.19      | Polygon  | -                   |
| Land cover                  | Copernicus                         | 15.11.18                  | 31.07.19      | Raster   | 100 meters          |
| Elevation                   | SRTM CGIAR                         | 25.11.18                  | 20.09.19      | Raster   | 30 meters           |
| Rivers and lakes            | DNGRH                              | 12.8.19                   | 19.9.19       | Polygon  | -                   |
| Flood extent Idai           | Sentinel 1 (HDX)                   | 19.03.19                  | 31.07.19      | Polygon  | -                   |
| Flood extent Kenneth        | Copernicus EMSR354 (INGC Geonode)  | 02.05.19                  | 31.07.19      | Polygon  | -                   |
| Roads                       | OpenStreetMap (INGC Geonode)       | 25.11.18                  | 07.08.19      | Lines    | -                   |
| Road damages (Idai/Kenneth) | LOG-WFP                            | 19.03.19/<br>03.05.19     | 23.09.19      | PDF file | -                   |
| Health facilities           | SIS-MA (HDX)                       | 31.12.17                  | 08.08.19      | Points   | -                   |
| Health facilities damages   | Provided by WHO-Mozambique         | 48h – 1 week post cyclone | 17.09.19      | Points   | -                   |
| Population density          | Facebook/CIESIN population density | 01.10.18                  | 06.08.19      | Raster   | 30 meters           |

131 <sup>a</sup> Abbreviations: CIESN = Center for International Earth Science Information Network, HDX = Humanitarian Data Exchange,  
 132 INE = National Institute for Statistics Mozambique, INGC = National Institute for Disaster Management Mozambique, SIS-  
 133 MA = Ministry of Health Mozambique, SRTM = Shuttle Radar Topography Mission, UN-OCHA ROSEA = United Nations  
 134 Office for the Coordination of Humanitarian Affairs Southern and Eastern Africa, LOG-WFP = Logistics Cluster World Food  
 135 Program

136 <sup>b</sup> Source date represents the imagery acquisition date for the flood extents and the release date for all other data

137

## 138 2.2 Data sources and preparation

139 The projection, resolution and alignment of geospatial data was processed using Quantum  
140 Geographical Information System (QGIS) (version 3.4)<sup>24</sup> and, to a limited extent, R (version  
141 3.5.2)<sup>25</sup>. As indicated in Table 1, most data layers were retrieved from open data platforms.  
142 All raster- and shapefiles were saved in the projection system of Mozambique, i.e. UTM-37S  
143 [EPSG:32737]. The data preparation process is briefly described below, and fully detailed in  
144 Supplementary 1.

146 Elevation data were obtained from the Shuttle Radar Topography Mission (SRTM) in tiles at  
147 a resolution of 30 meters<sup>26</sup>. Slopes were derived from it and accounted for when modelling  
148 walking movements.

150 Land cover data was downloaded for the whole African continent at 100 meter resolution  
151 from Copernicus Global Land Service<sup>27</sup> and was clipped to the extent of Mozambique. As  
152 analyses were carried out at 30-meter resolution the land cover raster was resampled at a  
153 resolution of 30 meters, using nearest neighbor interpolation.

155 The pre-cyclone road network dataset was retrieved from Open Street Map (OSM) through  
156 the Geonode Platform of the National Institute for Disaster Management Mozambique  
157 (INGC), and linked to the road damage information as indicated by the Logistics Cluster of  
158 the World Food Program (LOG-WFP)<sup>28,29</sup>. Historical post-cyclone status of roads and road  
159 segments were manually digitized from pdf maps provided by LOG-WFP. The maps were  
160 cross-referenced with the OSM road network layer, to include post-cyclone road damage  
161 status, i.e. 1) open 2) restricted 3) closed. Road damages as a consequence of cyclones Idai  
162 and Kenneth were taken from maps dated March 19 and May 3 2019, respectively (Table 1)  
163 <sup>28,29</sup>. Information on road type and damage were combined in order to obtain unique road  
164 type-damage combinations.

166 Information on rivers and lake layout were obtained as shapefiles from the National  
167 Directorate for Water Resource Management (DNGRH). Only primary rivers and lakes were  
168 considered as barriers to movement, under the assumption that smaller rivers and streams  
169 were passable by the population. Flood extents for Idai (on 19 March 2019) and Kenneth (on

1  
2  
3 170 2 May 2019) were sourced as shapefiles from Sentinel-1 and Copernicus EMSR354,  
4  
5 171 respectively. The flood extents were visually inspected and found to be largest on those two  
6  
7 172 dates, and thus represent the biggest constraints for health care access. All flooded areas  
8  
9 173 were treated under two scenarios: 1) as being impassable, under the assumption that  
10  
11 174 people avoid traversing flood water to prevent further injury, 2) as being passable by foot at  
12  
13 175 an average walking speed of 1.5 km/h. In the first scenario, health facilities located on flood  
14  
15 176 extents were always treated as inaccessible since they are located on barriers.

16 177

17  
18 178 High-resolution population density estimates for children under five were obtained from the  
19  
20 179 Facebook Connectivity Lab and Center for International Earth Science Information network<sup>30</sup>  
21  
22 180 with a 30-meter resolution.

23 181

24  
25 182 Additionally, geographic coordinates of all villages (i.e. communities) in Idai-affected  
26  
27 183 districts were obtained from UNICEF Mozambique, which had gathered this information  
28  
29 184 through a community mapping initiative conducted by health officials, 6 to 8 months before  
30  
31 185 Cyclone Idai made landfall. These community locations were used to extract pre- and post-  
32  
33 186 cyclone travel time for each community to the nearest functional health center.

34 187

35  
36 188 The geographic coordinates of all health facilities were sourced from the health  
37  
38 189 management information system, Ministry of Health in Mozambique (SIS-MA). Data  
39  
40 190 cleaning was undertaken in cases where the geographic coordinates for health facilities  
41  
42 191 were located outside the international border of Mozambique or for coordinates falling on  
43  
44 192 barriers to movement (Supplementary 1). Information on damaged health facilities was  
45  
46 193 provided in tabular format by the World Health Organization (WHO). The health system in  
47  
48 194 Mozambique comprises four levels; the primary level consists of urban and rural health  
49  
50 195 centers, the secondary level consists of general, rural and district hospitals, the tertiary level  
51  
52 196 comprises provincial capital hospitals, and quaternary facilities comprise the central and  
53  
54 197 specialized hospitals<sup>31</sup>. Health facilities of all levels were included in the model.

54 198

55  
56 199 Districts that were most affected by Cyclones Idai and Kenneth ("cyclone-affected districts",  
57  
58 200 thereafter) were identified in close collaboration with UNICEF and humanitarian responders.

1  
2  
3 201 All statistics presented below were calculated for these identified districts, with 26 such  
4  
5 202 districts in the Idai-affected region and 11 districts in the Kenneth-affected region (Figure 1).  
6

7 203

### 8 204 **2.3 Geographical accessibility modelling**

9  
10 205 To model travel times and population coverages, we used AccessMod 5 (version 5.6.30)<sup>23,32</sup>.

11 206 AccessMod models geographic accessibility using terrain-based least-cost path distance  
12  
13 207 calculation. This open-source software has been successfully applied in many different  
14  
15 208 settings, among which accessibility and referral assessments of health facility networks,  
16  
17 209 optimization modelling of health programs in obstetric and neonatal care (EmONC)<sup>33</sup>,  
18  
19 210 primary health care<sup>34</sup>, emergency care<sup>35</sup>, referral times<sup>36</sup>, and treatment of fever cases<sup>37</sup>.  
20  
21 211

22  
23 212 Using the data preparation modules in AccessMod, we overlaid the roads, rivers, lakes,  
24  
25 213 flood extent, and landcover datasets to obtain a single 30-m resolution raster data set, to  
26  
27 214 which different travel scenarios were applied.  
28

29 215

30 216 The travel scenarios (presented in Supplementary 2) were derived using local information as  
31  
32 217 model inputs on pre-cyclone and post-cyclone travel speeds and travel modes. Both  
33  
34 218 scenarios were developed in close collaboration with UNICEF Mozambique, with focus on  
35  
36 219 geographic accessibility to functional health facilities for the target population of children  
37  
38 220 under 5. Post-cyclone travel speeds were adjusted for wet weather conditions as heavy  
39  
40 221 rains persisted in the direct aftermath of both cyclones. During the post-cyclone situation,  
41  
42 222 restricted and closed roads were assumed to be unpassable by any vehicle; but where flood  
43  
44 223 waters were not inundating roads, they were perceived to be accessible by foot. All  
45  
46 224 landcover classes outside of the road network and the barriers were considered as passable.  
47  
48 225 We assumed a functional bridge where a road segment crossed a river.  
49

50 226

51 227 To account for uncertainty of the assumed travel speeds, we also considered both pre- and  
52  
53 228 post-cyclone motorized travel speeds with a 20% slower and 20% faster speed, as adapted  
54  
55 229 from Ouma et al. (2018)<sup>35</sup>. Population coverage of the network of health centers was  
56  
57 230 calculated at the 2-hour maximum travel time limit. This limit was deemed appropriate to  
58  
59 231 capture the extent of effective access, and is often used in health accessibility studies,  
60  
232 notably in maternal health (Ebener et al., 2019). A paired T-test was used to check for

1  
2  
3 233 statistically significant difference between pre-cyclone and post-cyclone population  
4  
5 234 coverage (R version 3.5.2).  
6

7 235

8  
9 236 **FIGURE 1**  
10

11 237

12 238 **2.4 Patients and the public involvement**

13  
14 239 There was no patient or public involvement in this study. Health facility functionality status  
15  
16 240 was shared in tabular format by WHO. All other geospatial data were publicly available.  
17

18 241

19  
20 242 **3. RESULTS**

21  
22 243 **3.1 Pre-cyclone accessibility**

23 244 Pre-cyclone coverage in Idai-affected districts (Figure 3a) was highest in Cidade De Chimoio  
24  
25 245 and Cidade Da Beira, with 99.8% and 99.5% of all children under 5 covered within the 2  
26  
27 246 hours catchment limit, respectively (Supplementary 3). However, this coverage ranged from  
28  
29 247 35.8-99.8% in all Idai-affected districts (Supplementary 3). Absolute pre-cyclone coverage  
30  
31 248 was also highest in Cidade De Chimoio and Cidade Da Beira, where 57,476, and 66,135  
32  
33 249 children were within 2 hours travel time from a health facility (Figure 2). In Kenneth-  
34  
35 250 affected districts (Figure 1b), pre-cyclone coverage was highest in Cidade De Pemba, where  
36  
37 251 100% of the children under 5 were expected to be able to reach a health facility within 2  
38  
39 252 hours travel time (Supplementary 4). The lowest pre-cyclone coverage was seen in Mazeze,  
40  
41 253 where only 52.6% of children under 5 were within 2 hours travel time from a health facility  
42  
43 254 (Supplementary 4). Absolute pre-cyclone coverage in Kenneth-affected districts was highest  
44  
45 255 in Cidade De Pemba (n = 35,467 children) and Chiure (n= 18,257 children) (Figure 2). Figure  
46  
47 256 3a and Figure 4a present the pre-cyclone travel time rasters for the cyclone-affected areas.  
48

49 257

50  
51 258 **FIGURE 2**  
52

53 259

54 260 **3.2 Accessibility losses in affected districts**

55 261 Geographical accessibility to health care significantly decreased in the cyclone affected  
56  
57 262 districts, as a result of reduced travel speeds, road constraints and non-functional health  
58  
59 263 facilities (Figure 3B and Figure 4B). In Figure 3C, ratios of pre-cyclone and post-cyclone  
60  
264 travel time rasters are mapped for Idai-affected districts, with ratios close to 1 indicating

265 similar travel times pre- and post-cyclone, and ratios closer to 0 indicating large pre- and  
 266 post-cyclone accessibility differences. Figure 4C presents the same results for Kenneth-  
 267 affected districts. Regions shown in red indicate localities with relatively large differences  
 268 between pre- and post-cyclone travel times (Figure 3C). In the Idai-affected region,  
 269 especially in the districts surrounding the flood water and closed roads, accessibility is  
 270 severely impacted. In Idai affected districts, the percentage of children under 5 covered  
 271 within 2 hours travel time, generally decreased from 78.8% to 52.5%, implying that 136,941  
 272 previously covered children under 5, lost timely access to health care (Table 2).

273

274 **Table 2-** Overview of pre- and post-cyclone population coverage in Idai and Kenneth  
 275 affected districts.

| Cyclone | Travel time | P-value* | Pre-cyclone               |                         | Post-cyclone              |                         |                                 |                               |
|---------|-------------|----------|---------------------------|-------------------------|---------------------------|-------------------------|---------------------------------|-------------------------------|
|         |             |          | Children <5 covered (nr.) | Children <5 covered (%) | Children <5 covered (nr.) | Children <5 covered (%) | Children <5 coverage loss (nr.) | Children <5 coverage loss (%) |
| Idai    | 30 minutes  | 0.009    | 298432                    | 57.3                    | 153842                    | 29.5                    | 144591                          | 27.7                          |
|         | 1 hour      | 0.002    | 346409                    | 66.5                    | 206610                    | 39.6                    | 139799                          | 26.8                          |
|         | 2 hours     | < 0.001  | 410696                    | 78.8                    | 273755                    | 52.5                    | 136941                          | 26.3                          |
| Kenneth | 30 minutes  | 0.001    | 131120                    | 72.0                    | 63953                     | 48.8                    | 30415                           | 23.2                          |
|         | 1 hour      | 0.010    | 99056                     | 73.8                    | 86997                     | 64.8                    | 12060                           | 9.0                           |
|         | 2 hours     | 0.039    | 110348                    | 82.2                    | 96019                     | 71.5                    | 14330                           | 10.7                          |

276 \*P-values were obtained through a paired T-test.

277

278 The largest relative population coverage decline, within 2 hours travel time, was observed in  
 279 Machanga, where 77.6% of the previously covered population was no longer able to access  
 280 a facility under 2 hours in the aftermath of Idai (Figure 2). In terms of absolute coverage,  
 281 Nhamatanda was the heaviest affected district, with a coverage loss of 25,121 children  
 282 under 5, followed by Morrumbala (n = 19,554 children), Cidade Da Beira (n = 17,355  
 283 children), and Buzi (n= 9,949 children) (Figure 2). Uncertainty modelling, by accounting for  
 284 20% slower and 20% faster motorized travel speeds, indicated localities with travel time  
 285 differences up to 3-hours comparing slower and faster travel speeds (Figure 3D). This  
 286 information indicates where accessibility and coverage losses may be either under- or  
 287 overestimated, which can help guide resource allocation for decreasing this uncertainty.

288

289 Relative population coverage in all Kenneth-affected districts decreased from 82.2% to  
 290 71.5%, corresponding to 14,330 children having lost access to the nearest facility within 2

1  
2  
3 291 hours travel time (Table 2). The most affected district in terms of relative coverage loss was  
4  
5 292 Macomia, where 88.9% of previously covered children lost access (Supplementary 3-  
6  
7 293 Supplementary 4). Mazeze was the heaviest affected district in terms of absolute coverage  
8  
9 294 loss, as 5,496 children lost access in the aftermath of cyclone Kenneth, followed by  
10  
11 295 Macomia (n= 3,727 children), Chiure (n= 2,307 children), Quissanga (n= 1,270 children) and  
12  
13 296 Mueda (n= 750 children) (Figure 2). Pre-cyclone population coverage significantly ( $p < 0.05$ )  
14  
15 297 differed from post-cyclone population coverage under all travel time limits (30 minutes, 1  
16  
17 298 hour, 2 hours) and for both cyclones (Table 2). Since flood waters slowly receded in the  
18  
19 299 days/weeks after the cyclones, we ran an additional scenario where flood waters were  
20  
21 300 passable at a 1.5km/h walking speed. Considering this scenario, absolute coverage losses for  
22  
23 301 Idai-affected districts within 2 hours travel time were highest in Morrumbala (n= 29,566  
24  
25 302 children), Nhamatanda (n= 25,758 children), Dacata (n= 8,914 children), and Bùzi (n= 8,757  
26  
27 303 children). In Kenneth-affected districts, Mazeze (n= 6,167 children), Chiure (n= 4,684  
28  
29 304 children) and Macomia (n= 3,727 children) had the highest coverage losses in 2 hours  
30  
31 305 catchments under the passable scenario.  
32  
33 306

### 307 **3.3 Travel time in affected communities**

34 308 The most affected villages in Idai-affected districts, in terms of reduced accessibility to the  
35  
36 309 nearest health facility were communities located in the district Bùzi and Muanza in Sofala  
37  
38 310 province. The community Mucinemo in Bùzi was found to have a pre-cyclone travel time of  
39  
40 311 1.3 hours to the nearest health facility. However, this travel time upsurged to 63.6 hours in  
41  
42 312 the direct aftermath of cyclone Idai (Supplementary 5-Supplementary 6). Generally, the 6  
43  
44 313 most affected communities in terms of accessibility in Idai affected districts all had a pre-  
45  
46 314 cyclone travel time between 1 hour and 3 hours, while all post-cyclone travel times  
47  
48 315 increased to over 55 hours (Supplementary 6). Overall, post-cyclone accessibility ranged  
49  
50 316 from some minutes up to 78 hours, with the highest travel time for the community of  
51  
52 317 Chipota, Muanza.

---

54 319 FIGURE 3 & 4

---

### 3.4 Health facility closures

The sole effect of non-functionality of health facilities was isolated by comparing two separate scenarios; 1) a post-cyclone scenario where all health facilities were considered functional, and 2) a post-cyclone scenario where functionality status was considered. By comparing these scenarios to the pre-cyclone accessibility, the coverage losses caused by the disruption to transportation only (i.e. adjusted travel speeds and road constraints) could be isolated from the reduction in coverage due to the damage to health facilities (i.e. non-functional health facilities), providing a way to assess the likely impact of future programs aimed at reinforcing health facilities for disasters. In order to make these comparisons, both scenarios were run under the assumption that flood waters were fully passable. In case all health facilities remained functional in Idai-affected districts (i.e. disruption was due to transportation only), the overall coverage within 2 hours travel time would decrease from 79.3% to 57.7%, a difference of 21.6% (n = 112,538 children). Damage to health facilities caused an additional coverage decline of 5.3% (n = 27,840 children) in Idai-affected districts. However, hospital closures did not evenly affect all districts. In 17 out of 26 Idai-affected districts, hospital closures had no additional effect on accessibility, implying that coverage losses were only caused by disruption to transportation networks. However, in the remaining 9 Idai-affected districts, hospital closures were responsible for an additional 1.9-59.7% coverage loss within 2 hours catchment. Health facility closures in Machanga affected the relative coverage the most, with 59.7% coverage loss (n= 3,642 children) caused by non-functionality of 3 out of 6 health facilities. Absolute coverage losses as an effect of non-functional health facilities, were highest in Nhamatanda, where 12,946 (31.0%) children under 5 years old lost access due to health facility closures. In Nhamatanda, 9 out of 16 health facilities became unfunctional as a consequence of Cyclone Idai. Health facility closures did not have an additional effect on post-cyclone accessibility in Kenneth affected districts.



#### 349 4. DISCUSSION

350 Population coverage significantly decreased ( $p < 0.05$ ) and travel times substantially  
351 increased in the direct aftermath of the cyclones. Damage to transport networks and  
352 reduced travel speeds resulted in the most substantial population coverage losses in both  
353 Idai- and Kenneth-affected districts.

354  
355 In a post-disaster setting, access to health care is essential for effective response and  
356 recovery<sup>38</sup>. The results of our study can be implemented beyond the response phase of the  
357 cyclones. Although the emphasis of the results is on identification of population coverage  
358 losses on district level directly post-cyclone, the information presented here also provides a  
359 platform for discussing health system recovery, mitigation and preparedness<sup>39</sup>.

360  
361 Early identification of underserved districts in the response phase can help reduce the  
362 impacts caused by health service interruption, through targeted deployment of medical  
363 services in districts with largest coverage losses and lowest baseline accessibility<sup>40</sup>.  
364 Information on population coverage losses per cyclone affected district can support  
365 decision-making in the prioritization and planning of these medical services, by targeting  
366 where the deployment of medical services reaches the highest number of people. Growing  
367 access to open data and post-disaster information enables prompt accessibility modelling in  
368 the aftermath of a natural disaster and the growing ability to quickly assemble this data  
369 provides an opportunity to integrate accessibility modelling in the early response phase of a  
370 natural disaster, so resources can be allocated in an informed way and health impacts can  
371 be reduced.

372  
373 Although flood waters receded in the weeks after the disasters, there were still 94 unsafe  
374 and non-functional health facilities in June 2019 as a consequence of substantial damages  
375 from the 2 cyclones<sup>14,41</sup>. While it is critical to restore access to essential health services as  
376 soon as possible, the WHO reported that the reconstruction of all destroyed and damaged  
377 facilities may take up to 5 years<sup>14</sup>.

378  
379 Furthermore, the extensive damages to the road network will continue to limit movements  
380 of the population, further complicating physical accessibility<sup>5</sup>. Our results have clearly

1  
2  
3 381 pointed that road damages are responsible for a relatively larger loss of accessibility  
4  
5 382 compared to the non-functionality of facilities. This calls for a concerted effort between  
6  
7 383 road and health authorities when prioritizing reconstruction efforts. It was estimated by  
8  
9 384 WHO that damages to (health) infrastructure translated into 200,000 people living more  
10  
11 385 than 5 kilometers from a functioning health facility <sup>41</sup>. However, our results, which provide a  
12  
13 386 more realistic representation of accessibility, by accounting for topography, barriers to  
14  
15 387 movement, and population distribution suggest this is an underestimate. We estimated that  
16  
17 388 as a result of the damage to infrastructure and barriers to movement, 314,591 children  
18  
19 389 under 5 live further than 1 hour travelling from a functioning health facility.  
20

21  
22  
23  
24  
25  
26  
27  
28  
29  
30  
31  
32  
33  
34  
35  
36  
37  
38  
39  
40  
41  
42  
43  
44  
45  
46

390  
391 Fourteen percent of all health facilities in cyclone-affected districts have been damaged or  
392 fully destroyed. Rebuilding more resilient facilities and infrastructure, both in terms of  
393 physical structure and in coping capacity, are needed to prevent similar impacts in future  
394 disasters <sup>41</sup>. The results presented here show the importance of joint efforts to reduce both  
395 impacts on health facilities and the existing road network. However, resources are limited,  
396 and efficient financial planning is needed to outline health system investment plans <sup>5,11</sup>. The  
397 results of our accessibility modelling can be used to prioritize health facility reconstruction  
398 for facilities with highest population coverages. Cyclone Idai for instance, caused the  
399 destruction of the only tertiary hospital in four affected provinces that serves an estimated  
400 12 million people <sup>38</sup>. Targeting hospitals with coverage numbers like these, to be  
401 strengthened for future disaster impacts and to support them in providing continuity of care  
402 in the aftermath of future disasters can help reduce coverage losses and health impacts  
403 subsequently <sup>42</sup>.

47  
48  
49  
50  
51  
52  
53  
54  
55  
56  
57  
58  
59  
60

404  
405 Due to the persisting health system disruption, humanitarian responders have identified the  
406 need to deploy community health workers (CHWs) and mobile outreach services to cover  
407 accessibility losses caused by the cyclones and to extend the reach of existing functional  
408 services <sup>38,43</sup>. These study findings can assist policymakers in identifying and prioritizing  
409 severely impacted districts and communities and regions where CHWs deployment can  
410 make a difference. Supplementary material 3 to 6 present the most affected communities in  
411 terms of increased travel time and coverage losses, directly post-cyclone. These analyses  
412 can be routinely updated to assess the effect of health system recovery on accessibility.

1  
2  
3 413 The districts that were most affected by Cyclone Idai and Kenneth were historically and are  
4 414 in the future also prone to disasters<sup>38,41</sup>. Ideally, accessibility modelling could be applied to  
5 415 simulate the effects of historical disasters on accessibility, as indicated in Supplementary 5  
6 416 and Supplementary 6, so targeted preventive measures can be taken for future disasters.  
7 417 Post-disaster accessibility modelling can help identify weak spots in the geographical  
8 418 accessibility to the health system and helps to distinguish pre-existing accessibility gaps  
9 419 (Figure 3A and 4A) from coverage losses as a result of disasters (Figure 3B and 4B). This  
10 420 information is essential in health system recovery, strengthening and preparing for future  
11 421 disasters.

12 422  
13 423 Limitations and uncertainties of this study were primarily linked to the data. The  
14 424 unfortunate event of natural disaster generally accelerates data availability in affected  
15 425 countries, but with the challenges of data quality, consistency, and format<sup>44</sup>. In this study,  
16 426 data from various sources were combined to represent the post-cyclone situation as  
17 427 realistically as possible, but since data gathering was ongoing, it was expected that some  
18 428 data were incomplete or not fully processed at the time of usage. Health facility coordinates  
19 429 for instance had duplicate occurrences in the database and health facility damages were  
20 430 solely indicated by name, which resulted in manual spatial merging. Co-occurrences of rivers  
21 431 that were indicated as floods were seen in the flood extent layer, minimally overestimating  
22 432 actual flood extents in some parts of the affected regions. Besides post-disaster data  
23 433 uncertainty, pre-disaster spatial data were also checked against background satellite  
24 434 imagery. The hydrography of primary rivers stored in the data was found not to be fully  
25 435 representative for actual hydrography in some regions, this could be a consequence of  
26 436 digitizing against a less granular spatial resolution<sup>45</sup>. In some cases, passages and bridges  
27 437 were detected on satellite background imagery where the OpenStreetMap road layer did  
28 438 not present presence of roads. The absence of roads in places where hydrography is  
29 439 potentially overestimated, results in isolated land pockets, where accessibility cannot be  
30 440 modelled, and the population is assumed to be fully isolated.

31 441  
32 442 Next to data uncertainties, travel scenarios present a source of uncertainty as assumptions  
33 443 on travel speeds and modes are uniformly generalized across regions. In addition, we  
34 444 assumed that roads indicated as being restricted or closed, were considered only passable

1  
2  
3 445 by foot if they were not inundated. However, some of the restricted roads were in fact  
4  
5 446 passable by 4x4 vehicles. Since car ownership and access to motorized transport by the  
6  
7 447 target population was expected to be very low, especially post-cyclone, it was decided to  
8  
9 448 run the accessibility model for restricted and closed roads only by means of walking.

10  
11 449  
12 450 Our accessibility modelling assumes that patients always travel to the nearest health facility.  
13  
14 451 However, literature has shown that patients sometimes bypass health facilities in search of  
15  
16 452 higher quality care in Mozambique <sup>46,47</sup>. Previous research, has shown that 30.8% of  
17  
18 453 pregnant women bypassed the nearest health facility in search of better prenatal care <sup>46</sup>.  
19  
20 454 Our results can therefore present slight underestimations of actual travel times.

21  
22 455  
23 456 Despite some of the limitations, the results presented here provide important initial  
24  
25 457 information for post-cyclone health system recovery which can be expanded through future  
26  
27 458 research. Since post-disaster needs continuously change based on the nature of the event  
28  
29 459 (e.g. receding flood waters, reconstruction efforts, and deployment of temporary medical  
30  
31 460 services), following studies should also be focused on the ability to dynamically model  
32  
33 461 accessibility based on these changes, so accessibility can be continuously monitored.  
34  
35 462 Additionally, it would be interesting to assess the effect of CHW deployment and mobile  
36  
37 463 outreach communities on improved accessibility and population coverage statistics, to  
38  
39 464 quantify the effect of these interventions.

40 465  
41 466 Post-disaster accessibility modelling can increase our understanding of spatial differences in  
42  
43 467 health care needs in the direct aftermath of a disaster and can help target limited resources  
44  
45 468 efficiently. Currently, there is no standardized approach among humanitarian agencies to  
46  
47 469 assess post-disaster accessibility losses, potentially resulting in uncoordinated decision  
48  
49 470 making for temporary health facility locations which could result in duplicated efforts by  
50  
51 471 humanitarian actors on the ground. The results in this paper not only reflect the importance  
52  
53 472 of incorporating accessibility modelling in early disaster response, but also provide a  
54  
55 473 platform for discussing health system recovery, mitigation and preparedness.

56 474  
57  
58 475  
59  
60

1  
2  
3 476 **AUTHOR CONTRIBUTION**  
4

5 477 **Fleur Hierink**: conceptualization, methodology, formal analysis, writing, editing,  
6  
7

8 478 visualization, supervision. **Nelson Rodrigues**: data sharing, methodology, writing, editing,  
9

10 479 validation. **Maria Muñiz**: writing, editing. **Rocco Panciera**: methodology, writing, editing.  
11  
12

13 480 **Nicolas Ray**: conceptualization, methodology, writing, editing, validation, supervision.  
14

15 481  
16

17 482 **DATA SHARING STATEMENT**  
18

19  
20 483 Data available upon request.  
21  
22  
23  
24  
25  
26  
27  
28  
29  
30  
31  
32  
33  
34  
35  
36  
37  
38  
39  
40  
41  
42  
43  
44  
45  
46  
47  
48  
49  
50  
51  
52  
53  
54  
55  
56  
57  
58  
59  
60

## 484 REFERENCES

- 485 1. Delamater PL, Messina JP, Shortridge AM, et al. Measuring geographic access to health  
486 care: raster and network-based methods. *International journal of health geographics*  
487 2012;11(1):15.
- 488 2. Davis JR, Wilson S, Brock-Martin A, et al. The impact of disasters on populations with  
489 health and health care disparities. *Disaster medicine and public health preparedness*  
490 2010;4(1):30-38.
- 491 3. Abbas HB, Routray JK. A semi-quantitative risk assessment model of primary health care  
492 service interruption during flood: Case study of Aroma locality, Kassala State of  
493 Sudan. *International Journal of Disaster Risk Reduction* 2013;6:118-28.
- 494 4. Makanga PT, Schuurman N, Sacoer C, et al. Seasonal variation in geographical access to  
495 maternal health services in regions of southern Mozambique. *International journal*  
496 *of health geographics* 2017;16(1):1.
- 497 5. UN-OCHA. Humanitarian Reponse Plan (2018-2019): revised following Cyclones Idai and  
498 Kenneth, May 2019.
- 499 6. Chen WH, Azman AS. Mitigating Cholera in the Aftermath of Cyclone Idai. *The American*  
500 *journal of tropical medicine and hygiene* 2019:tpmd190285.
- 501 7. World Health Organization. Relatório da Situação Nacional 11: 04 de Outubro de 2019,  
502 Período abrangido 9 a 22 de Setembro de 2019, 2019.
- 503 8. Cambaza E, Mongo E, Anapakala E, et al. Outbreak of Cholera Due to Cyclone Kenneth in  
504 Northern Mozambique, 2019. *International journal of environmental research and*  
505 *public health* 2019;16(16):2925.
- 506 9. Willcock G. After Cyclones Idai and Kenneth, Recovery in Mozambique Continues:  
507 Reliefweb; 2019 [updated 17 May 2019. Available from:  
508 [https://reliefweb.int/report/mozambique/after-cyclones-idai-and-kenneth-recovery-](https://reliefweb.int/report/mozambique/after-cyclones-idai-and-kenneth-recovery-mozambique-continues)  
509 [mozambique-continues](https://reliefweb.int/report/mozambique/after-cyclones-idai-and-kenneth-recovery-mozambique-continues) accessed 16 Oct 2019.
- 510 10. UNICEF. Cyclone response mid-year sitrep #12: March-July 2019. Mozambique situation  
511 report, 2019.
- 512 11. Devi S. Cyclone Idai: 1 month later, devastation persists. *The Lancet*  
513 2019;393(10181):1585.
- 514 12. Kahn R, Mahmud AS, Schroeder A, et al. Rapid Forecasting of Cholera Risk in  
515 Mozambique: Translational Challenges and Opportunities. *Prehospital and disaster*  
516 *medicine* 2019;34(5):557-62.
- 517 13. Santos E. Mozambique: The recovery from Cyclone Idai continues, but health needs  
518 remain [Report]. 3 May 2019 [Available from:  
519 [https://reliefweb.int/report/mozambique/mozambique-recovery-cyclone-idai-](https://reliefweb.int/report/mozambique/mozambique-recovery-cyclone-idai-continues-health-needs-remain)  
520 [continues-health-needs-remain](https://reliefweb.int/report/mozambique/mozambique-recovery-cyclone-idai-continues-health-needs-remain).
- 521 14. World Health Organization. Cyclone Idai - events as they happen 2019 [updated 18 June  
522 2019. Available from: [https://www.who.int/emergencies/cyclone-idai/events-as-](https://www.who.int/emergencies/cyclone-idai/events-as-they-happen)  
523 [they-happen](https://www.who.int/emergencies/cyclone-idai/events-as-they-happen) accessed 16 October 2019.
- 524 15. UNICEF. Strategy for health (2016–2030). *New York: United Nations Children's Fund* 2015
- 525 16. Datar A, Liu J, Linnemayr S, et al. The impact of natural disasters on child health and  
526 investments in rural India. *Social Science & Medicine* 2013;76:83-91.
- 527 17. Kuruvilla S, Bustreo F, Kuo T, et al. The Global strategy for women's, children's and  
528 adolescents' health (2016–2030): a roadmap based on evidence and country  
529 experience. *Bulletin of the World Health Organization* 2016;94(5):398.

- 1  
2  
3 530 18. International Federation of the Red Cross. Mozambique: Tropical Cyclones Idai and  
4 531 Kenneth Operations Update 2: 24 June 2019, 2019.
- 5 532 19. Muggy L, Stamm JLH. Dynamic, robust models to quantify the impact of decentralization  
6 533 in post-disaster health care facility location decisions. *Operations Research for*  
7 534 *Health Care* 2017;12:43-59.
- 8 535 20. Humanitarian Data Exchange. Mozambique 2019 [Available from:  
9 536 <https://data.humdata.org/event/idai> accessed 25 April 2019.
- 10 537 21. Tapia AH, Maldonado E, Tchouakeu LMN, et al. Coordinating humanitarian information.  
11 538 *Information Technology & People* 2012
- 12 539 22. Thévenaz C, Resodihardjo SL. All the best laid plans... conditions impeding proper  
13 540 emergency response. *International Journal of Production Economics* 2010;126(1):7-  
14 541 21.
- 15 542 23. Ray N, Ebener S. AccessMod 3.0: computing geographic coverage and accessibility to  
16 543 health care services using anisotropic movement of patients. *International journal of*  
17 544 *health geographics* 2008;7(1):63.
- 18 545 24. QGIS geographic information system [program], 2019.
- 19 546 25. R: A Language and Environment for Statistical Computing [program]. 5 version. Vienna,  
20 547 Austria: R Foundation for Statistical Computing, 2018.
- 21 548 26. Jarvis A, Reuter H, Nelson A, et al. Hole-field seamless SRTM data, International Centre  
22 549 for Tropical Agriculture (CIAT). <http://srtmcsicgjar.org> 2008
- 23 550 27. Buchhorn M, Smets B, Bertels L, et al. Copernicus Global Land Service: Land Cover 100m:  
24 551 Collection 2: epoch 2015. Dataset of the global component of the Copernicus Land  
25 552 Monitoring Service. 2019
- 26 553 28. LOG-WFP. Mozambique: Access Constraints as of 19 March 2019, 2019.
- 27 554 29. LOG-WFP. Mozambique - Cabo Delgado: Access constraints map 3 May 2019, 2019.
- 28 555 30. Facebook Connectivity Lab and Center for International Earth Science Information  
29 556 Network - CIESIN - Columbia University. High Resolution Settlement Layer (HRSL).  
30 557 <https://data.humdata.org/dataset/highresolutionpopulationdensitymaps-moz> 2019  
31 558 [accessed 6 August 2019].
- 32 559 31. dos Anjos Luis A, Cabral P. Geographic accessibility to primary healthcare centers in  
33 560 Mozambique. *International journal for equity in health* 2016;15(1):173.
- 34 561 32. WHO. Health economics: GeoAccess 2019 [Available from:  
35 562 <https://www.who.int/choice/geoaccess/en/> accessed 15 March 2019.
- 36 563 33. Ebener S, Stenberg K, Brun M, et al. Proposing standardised geographical indicators of  
37 564 physical access to emergency obstetric and newborn care in low-income and middle-  
38 565 income countries. *BMJ global health* 2019;4(Suppl 5)
- 39 566 34. Munoz UH, Källestål C. Geographical accessibility and spatial coverage modeling of the  
40 567 primary health care network in the Western Province of Rwanda. *International*  
41 568 *journal of health geographics* 2012;11(1):40.
- 42 569 35. Ouma PO, Maina J, Thurairana PN, et al. Access to emergency hospital care provided by  
43 570 the public sector in sub-Saharan Africa in 2015: a geocoded inventory and spatial  
44 571 analysis. *The Lancet Global Health* 2018;6(3):e342-e50.
- 45 572 36. Schmitz MM, Serbanescu F, Arnott GE, et al. Referral transit time between sending and  
46 573 first-line receiving health facilities: a geographical analysis in Tanzania. *BMJ global*  
47 574 *health* 2019;4(Suppl 5):e001568.
- 48  
49  
50  
51  
52  
53  
54  
55  
56  
57  
58  
59  
60

- 1  
2  
3 575 37. Alegana VA, Wright JA, Pentrina U, et al. Spatial modelling of healthcare utilisation for  
4 576 treatment of fever in Namibia. *International journal of health geographics*  
5 577 2012;11(1):6.
- 7 578 38. Moitinho de Almeida M, Guha-Sapir D. Why Mozambique's cyclones tell us disaster  
8 579 preparedness needs health at its core: The BMJ opinion 2019 [Available from:  
9 580 [https://blogs.bmj.com/bmj/2019/05/10/mozambiques-cyclones-disaster-](https://blogs.bmj.com/bmj/2019/05/10/mozambiques-cyclones-disaster-preparedness-needs-health-core/?utm_source=twitter&utm_medium=hootsuite&utm_term=&utm_content=&utm_campaign=editors)  
10 581 [preparedness-needs-health-](https://blogs.bmj.com/bmj/2019/05/10/mozambiques-cyclones-disaster-preparedness-needs-health-core/?utm_source=twitter&utm_medium=hootsuite&utm_term=&utm_content=&utm_campaign=editors)  
11 582 [core/?utm\\_source=twitter&utm\\_medium=hootsuite&utm\\_term=&utm\\_content=&u](https://blogs.bmj.com/bmj/2019/05/10/mozambiques-cyclones-disaster-preparedness-needs-health-core/?utm_source=twitter&utm_medium=hootsuite&utm_term=&utm_content=&utm_campaign=editors)  
12 583 [tm\\_campaign=editors](https://blogs.bmj.com/bmj/2019/05/10/mozambiques-cyclones-disaster-preparedness-needs-health-core/?utm_source=twitter&utm_medium=hootsuite&utm_term=&utm_content=&utm_campaign=editors) accessed 17 December 2019.
- 14 584 39. Khan H, Vasilescu LG, Khan A. Disaster management cycle-a theoretical approach.  
15 585 *Journal of Management and Marketing* 2008;6(1):43-50.
- 17 586 40. Liu A, Sullivan S, Khan M, et al. Community health workers in global health: scale and  
18 587 scalability. *Mount Sinai Journal of Medicine: A Journal of Translational and*  
19 588 *Personalized Medicine* 2011;78(3):419-35.
- 21 589 41. World Health Organization. As post-cyclone resettlement, 200 000 people lack access to  
22 590 health services in Mozambique. Reliefweb, 2019.
- 23 591 42. World Health Organization. Natural disasters: protecting the public's health. Natural  
24 592 disasters: protecting the public's health2000.
- 25 593 43. UNICEF. One year after Cyclone Idai, 2.5 million people in Mozambique remain in need  
26 594 of humanitarian assistance: UNICEF prepares for more frequent and ferocious  
27 595 disasters as a result of the climate crisis 2020 [Available from:  
28 596 [https://www.unicef.org/mozambique/en/press-releases/one-year-after-cyclone-](https://www.unicef.org/mozambique/en/press-releases/one-year-after-cyclone-idai-25-million-people-mozambique-remain-need-humanitarian)  
29 597 [idai-25-million-people-mozambique-remain-need-humanitarian](https://www.unicef.org/mozambique/en/press-releases/one-year-after-cyclone-idai-25-million-people-mozambique-remain-need-humanitarian) accessed 16 March  
30 598 2020.
- 32 599 44. Altay N, Labonte M. Challenges in humanitarian information management and  
33 600 exchange: evidence from Haiti. *Disasters* 2014;38(s1):S50-S72.
- 35 601 45. Nelson T, Wulder M, Niemann K. Spatial resolution implications of digitizing aerial  
36 602 photography for environmental applications. *The Imaging Science Journal*  
37 603 2001;49(4):223-32.
- 39 604 46. Yao J, Agadjanian V. Bypassing health facilities in rural Mozambique: spatial,  
40 605 institutional, and individual determinants. *BMC health services research*  
41 606 2018;18(1):1006.
- 42 607 47. Keyes EB, Parker C, Zissette S, et al. Geographic access to emergency obstetric services:  
43 608 a model incorporating patient bypassing using data from Mozambique. *BMJ Global*  
44 609 *Health* 2019;4(Suppl 5):e000772.
- 46 610



1  
2  
3  
4  
5  
6  
7  
8  
9  
10  
11  
12  
13  
14  
15  
16  
17  
18  
19  
20  
21  
22  
23  
24  
25  
26  
27  
28  
29  
30  
31  
32  
33  
34  
35  
36  
37  
38  
39  
40  
41  
42  
43  
44  
45  
46  
47  
48  
49  
50  
51  
52  
53  
54  
55  
56  
57  
58  
59  
60

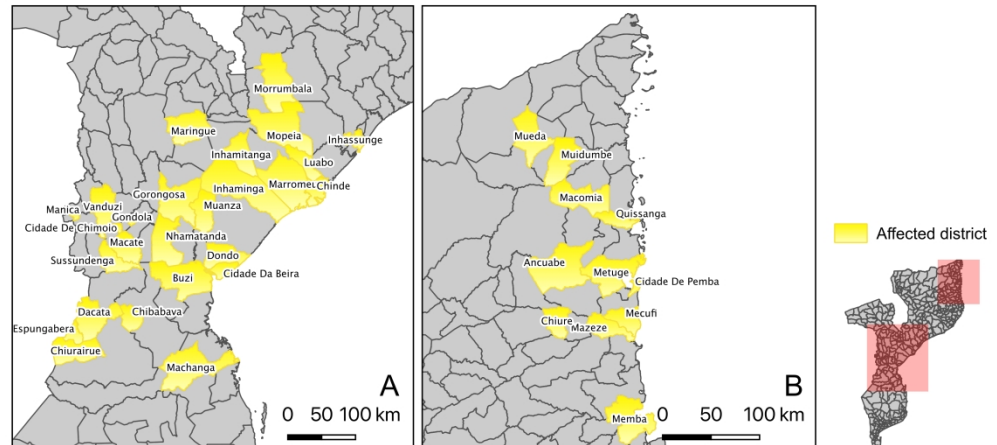

Figure 1 - Cyclone affected districts. (A) Idai affected districts. (B) Kenneth affected districts.

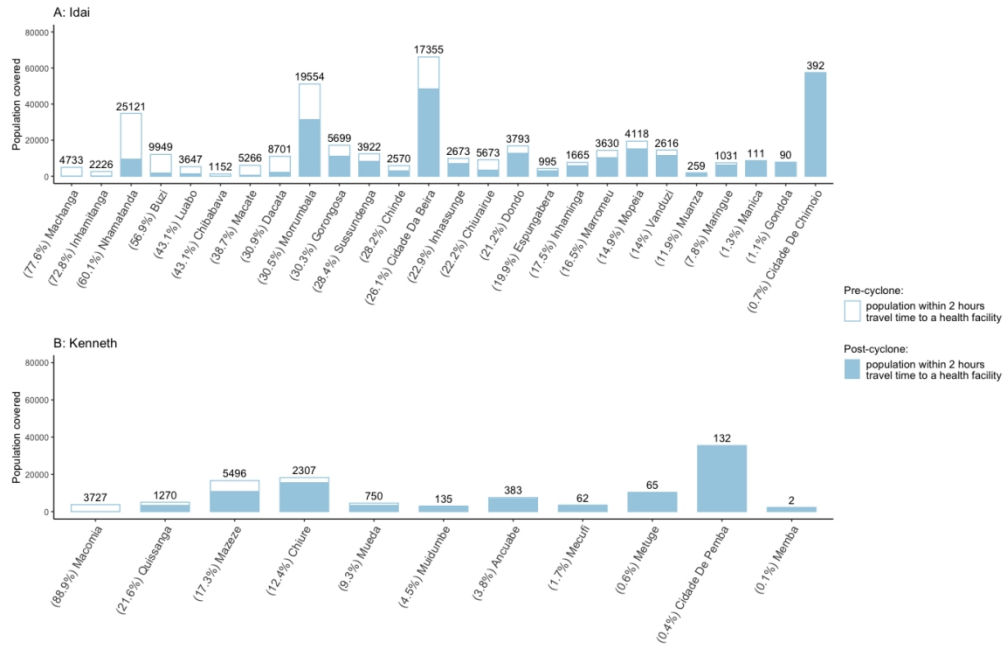

Figure 2- Absolute and relative reduction in population coverage pre- and post-cyclone Idai (A) and Kenneth (B). Labels on top of bars indicate absolute reduction in population coverage of children under 5. Labels under districts indicate relative reduction in population coverage. Maximum limits of the bars indicate the absolute pre-cyclone coverage within 2 hours travel time. Limits of the blue filled bar indicate the absolute post-cyclone coverage. The x-axis is ordered according to relative reduction in population coverage.

482x318mm (72 x 72 DPI)

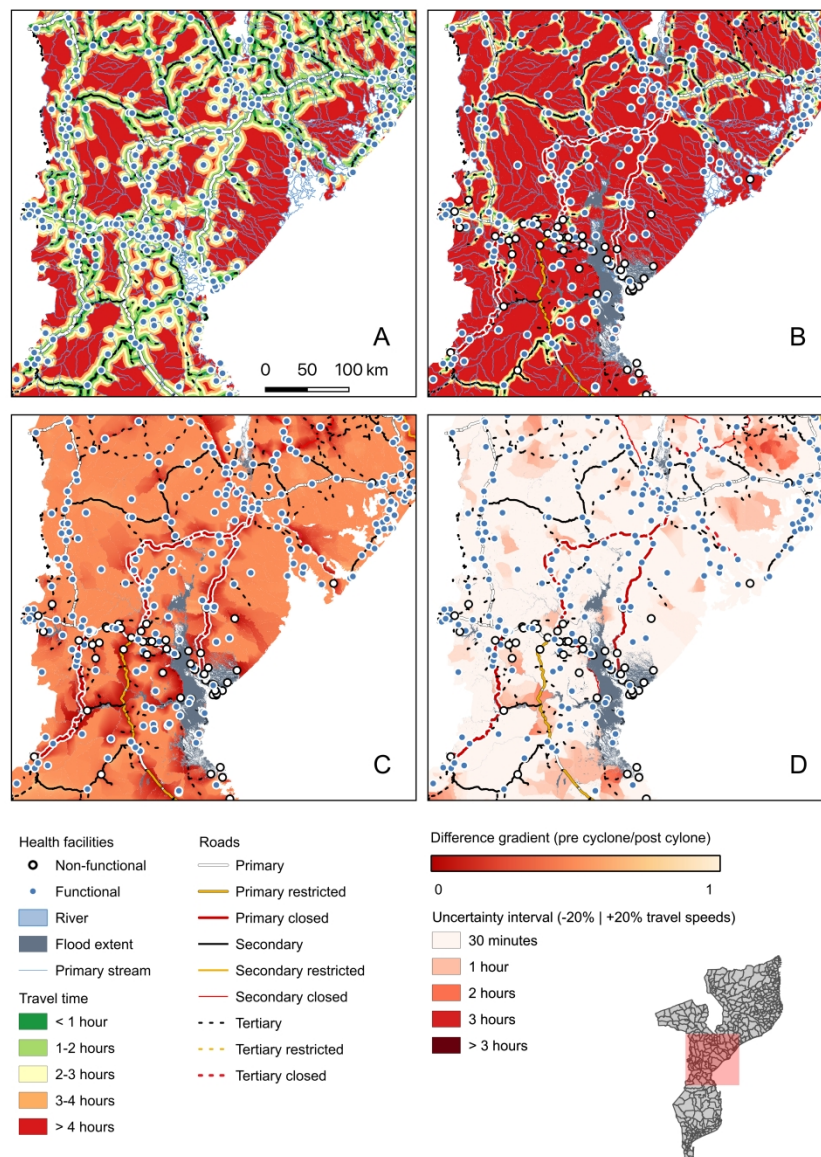

45 Figure 3 – Accessibility modelling results for Idai districts. Pre-cyclone travel time raster (A). Post-cyclone  
 46 travel time raster (B). Difference ratio raster between pre- and post-cyclone travel time (C). Uncertainty  
 47 raster, as a result of the difference between -20% and +20% travel speed accessibility (D).  
 48  
 49  
 50  
 51  
 52  
 53  
 54  
 55  
 56  
 57  
 58  
 59  
 60

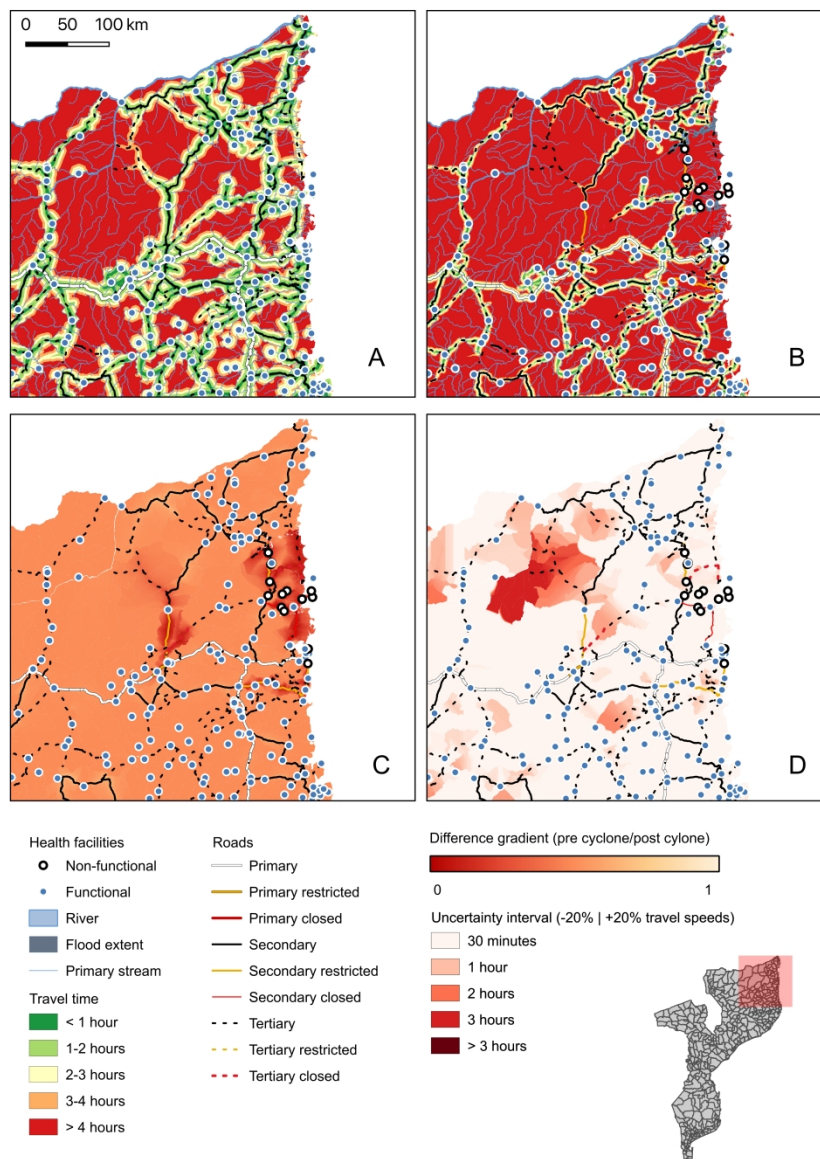

Figure 4 – Accessibility modelling results Kenneth districts. Pre-cyclone travel time raster (A). Post-cyclone travel time raster (B). Difference ratio raster between pre- and post-cyclone travel time (C). Uncertainty raster, as a result of the difference between -20% and +20% travel speed accessibility (D).

## SUPPLEMENTARY MATERIAL

### **S1-Data preparation for use in AccessMod**

All data preparation was carried out in Quantum Geographical Information System (QGIS) (version 3.4)<sup>24</sup> in limited combination with R (version 3.5.2)<sup>25</sup>. As indicated in Table 1, most data layers were retrieved from open data platforms. All raster- and shapefiles were saved in the projection system of Mozambique, i.e. UTM-37S [EPSG:32737]. All raster files were aligned using the digital elevation model (DEM) as reference. The data preparation process is fully described below for each data set.

#### *Elevation*

Anisotropic accessibility analyses, in other words analyses accounting for travel speeds on slopes, were carried out for this study. The digital elevation model (DEM) data were obtained in tiles at a resolution of 30 meters<sup>26</sup>. All separate tiles were first mosaiced in QGIS 3.4.

#### *Land cover*

The land cover data set of the African continent<sup>27</sup> was clipped to the extent of Mozambique, leaving a small buffer around the country to prevent loss of data cells at the border. The data set was resampled at a resolution of 30 meters using nearest neighbor interpolation.

#### *Road network*

The pre-cyclone road network dataset was retrieved from Open Street Map (OSM) through the Geonode Platform of the National Institute for Disaster Management Mozambique (INGC), as this dataset was perceived to represent the most recent information on the roads and could be linked to the damaged roads, as indicated by the Logistics Cluster of the World Food Program (LOG-WFP). Road classes that were not indicated as official classification by OSM, were removed from the data<sup>48</sup>.

LOG-WFP provided the most up to date data on road network damages. However, the road constraint shapefile was updated frequently by overwriting previous versions, without

1  
2  
3 storing data historically. Therefore, historical post-cyclone status of roads and road  
4 segments was manually digitized from pdf maps provided by LOG-WFP <sup>28 29</sup>. The pdf maps  
5 were manually cross-referenced with the OSM road network layer, to include post-cyclone  
6 status, i.e. 1) open 2) restricted 3) closed.  
7  
8  
9

10  
11  
12 Roads were then reclassified based on the unique combination of road type and post-  
13 cyclone status, resulting in 34 unique road classes (e.g. primary road, primary road  
14 restricted, secondary road closed). All roads were given a specific travel speed, accounting  
15 for the different scenarios. In the pre-cyclone scenario for instance, all primary road classes  
16 (i.e. primary road, primary road restricted, primary road closed) had the same travel speed.  
17  
18 Whereas in the post cyclone scenario, the restricted and closed road types had a travel  
19 speed and travel mode accounted for their damages, as can be seen from Supplementary 2.  
20  
21  
22  
23  
24  
25

### 26 *Barriers to movement*

27  
28 Rivers and lake shapefiles were obtained as lines and polygons from the National  
29 Directorate for Water Resource Management (DNGRH) and accuracy was checked using  
30 satellite imagery as a reference. Only primary rivers and lakes were taken for the analyses,  
31 under the assumption that smaller rivers and streams were passable by the population.  
32  
33 Water bodies were perceived as being impassable at all scales.  
34  
35  
36  
37  
38  
39

40 Flood extent caused by Cyclone Idai was taken from 19 March 2019 and flood extent for  
41 Cyclone Kenneth was taken from 2 May 2019, because extents were visually inspected and  
42 found to be largest on those dates and thus represent the biggest constraints for health care  
43 access. All flooded areas were treated as impassable at those dates, considering the depth  
44 and extent of the floods.  
45  
46  
47  
48  
49

### 50 *Population data*

51  
52 High resolution population density estimates for children under five were downloaded at 30  
53 meter resolution from the Facebook Connectivity Lab and Center for International Earth  
54 Science Information network <sup>30</sup>. The raster was projected in Mozambique's projection  
55 system, UTM-37S [EPSG:32737], by using nearest neighbor interpolation. Loss of population  
56  
57  
58  
59  
60

1  
2  
3 caused by reprojection and clipping to country borders, was corrected for by smoothing the  
4 lost population equally over the raster cells, using the raster calculator.  
5  
6  
7

### 8 *Health facilities*

9  
10 The geographic coordinates of all health facilities were obtained through the Humanitarian  
11 Data Exchange platform (HDX) and were originally sourced from the Ministry of Health in  
12 Mozambique (SIS-MA). The data was cleaned to exclude coordinates far outside of the  
13 country borders. Coordinates that fell just outside Mozambique were relocated within the  
14 country extents. Five health facilities were cross-referenced with other data sources (e.g.  
15 Neonatal Inventory Survey UNICEF, OpenStreetMap, Google Maps) because they were  
16 located on barriers, such as open sea, rivers or lakes.  
17  
18  
19  
20  
21  
22  
23  
24

25 Information on damaged health facilities was provided by the World Health Organization  
26 (WHO). This data did not include GPS coordinates, thus names of the damaged health  
27 facilities were cross referenced with the original health facility shapefile to include post-  
28 cyclone status of each facility, i.e. functional or non-functional. For damaged health facilities  
29 that were not included in the original health facility shapefile, coordinates were retrieved  
30 from a neonatal inventory performed by United Nations Children Fund (UNICEF) and also  
31 added as facility to the original health facility data, representing the pre-cyclone situation.  
32 Non-functional health facilities were filtered-out for geographical accessibility analyses  
33 reflecting the post-cyclone scenarios.  
34  
35  
36  
37  
38  
39  
40  
41  
42

### 43 *Travel scenario*

44  
45 Both our travel scenarios were developed in close collaboration with country  
46 representatives from UNICEF and were adapted to our target population, namely children  
47 under five accompanied by a parent (Supplementary 2). Flood waters were assumed to be a  
48 full barrier to movement to the target population, thus health facilities located in flooded  
49 zones were completely inaccessible and flood waters were impassable.  
50  
51  
52  
53  
54  
55  
56  
57  
58  
59  
60

## Supplementary 2- Travel scenarios pre-cyclone and post-cyclone

| Label                              | Pre-cyclone         |             | Post-cyclone        |             |
|------------------------------------|---------------------|-------------|---------------------|-------------|
|                                    | Travel speed (km/h) | Travel mode | Travel speed (km/h) | Travel mode |
| Shrubs                             | 3                   | Walking     | 1.5                 | Walking     |
| Herbaceous Vegetation              | 3                   | Walking     | 1.5                 | Walking     |
| Cultivated and Managed Vegetation  | 3                   | Walking     | 1.5                 | Walking     |
| Agriculture Cropland               |                     |             |                     |             |
| Urban Built Up                     | 3                   | Walking     | 1.5                 | Walking     |
| Bare Sparse Vegetation             | 3                   | Walking     | 1.5                 | Walking     |
| Permanent Water Bodies             | 3                   | Walking     | 1.5                 | Walking     |
| Temporary Water Bodies             | 3                   | Walking     | 1.5                 | Walking     |
| Herbaceous Wetland                 | 3                   | Walking     | 1.5                 | Walking     |
| Closed Forest Evergreen Broad Leaf | 3                   | Walking     | 1.5                 | Walking     |
| Closed Forest Deciduous Broad Leaf | 3                   | Walking     | 1.5                 | Walking     |
| Open Forest Evergreen Broad Leaf   | 3                   | Walking     | 1.5                 | Walking     |
| Open Forest Deciduous Broad Leaf   | 3                   | Walking     | 1.5                 | Walking     |
| Open Sea                           | 3                   | Walking     | 1.5                 | Walking     |
| Trunk                              | 80                  | Motorized   | 50                  | Motorized   |
| Trunk Restricted                   | 80                  | Motorized   | 1.5                 | Walking     |
| Trunk Closed                       | 80                  | Motorized   | 1.5                 | Walking     |
| Primary                            | 80                  | Motorized   | 50                  | Motorized   |
| Primary Restricted                 | 80                  | Motorized   | 1.5                 | Walking     |
| Primary Closed                     | 80                  | Motorized   | 1.5                 | Walking     |
| Secondary                          | 50                  | Motorized   | 40                  | Motorized   |
| Secondary Restricted               | 50                  | Motorized   | 1.5                 | Walking     |
| Secondary Closed                   | 50                  | Motorized   | 1.5                 | Walking     |
| Tertiary                           | 30                  | Motorized   | 15                  | Motorized   |
| Tertiary Closed                    | 30                  | Motorized   | 1.5                 | Walking     |
| Tertiary Restricted                | 30                  | Motorized   | 1.5                 | Walking     |
| Road                               | 20                  | Motorized   | 10                  | Motorized   |
| Raceway                            | 3                   | Walking     | 3                   | Walking     |
| Residential                        | 20                  | Motorized   | 10                  | Motorized   |
| Residential Closed                 | 20                  | Motorized   | 1.5                 | Walking     |
| Living Street                      | 20                  | Motorized   | 10                  | Motorized   |
| Service                            | 3                   | Walking     | 1.5                 | Walking     |
| Track                              | 15                  | Motorized   | 10                  | Motorized   |
| Pedestrian                         | 3                   | Walking     | 1.5                 | Walking     |
| Pier                               | 3                   | Walking     | 1.5                 | Walking     |
| Path Closed                        | 3                   | Walking     | 1.5                 | Walking     |
| Path                               | 3                   | Walking     | 1.5                 | Walking     |
| Footway                            | 3                   | Walking     | 1.5                 | Walking     |
| Bridleway                          | 3                   | Walking     | 1.5                 | Walking     |
| Cycleway                           | 3                   | Walking     | 1.5                 | Walking     |
| Steps                              | 3                   | Walking     | 1.5                 | Walking     |
| Unclassified                       | 3                   | Walking     | 1.5                 | Walking     |



**Supplementary 3- Relative population coverage pre- and post-cyclone Idai.** Ordered on relative difference. Difference indicated between parentheses. Error bars indicate the coverage uncertainty, considering -20% and +20% travel speeds.

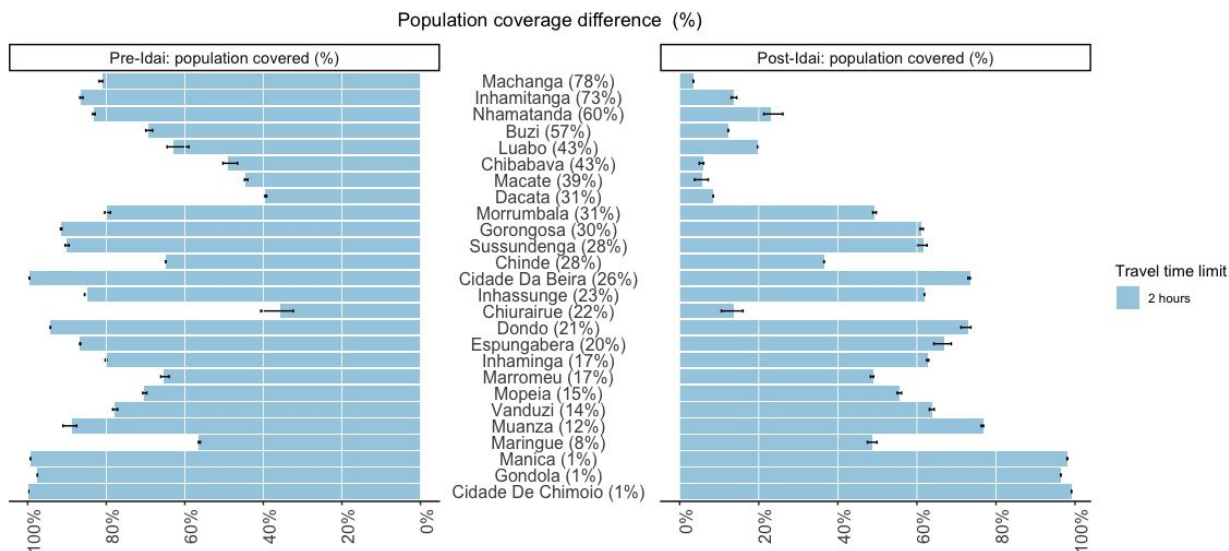

**Supplementary 4- Relative population coverage pre- and post-cyclone Kenneth.** Ordered on relative difference. Difference indicated between parentheses. Error bars indicate the coverage uncertainty, considering -20% and +20% travel speeds.

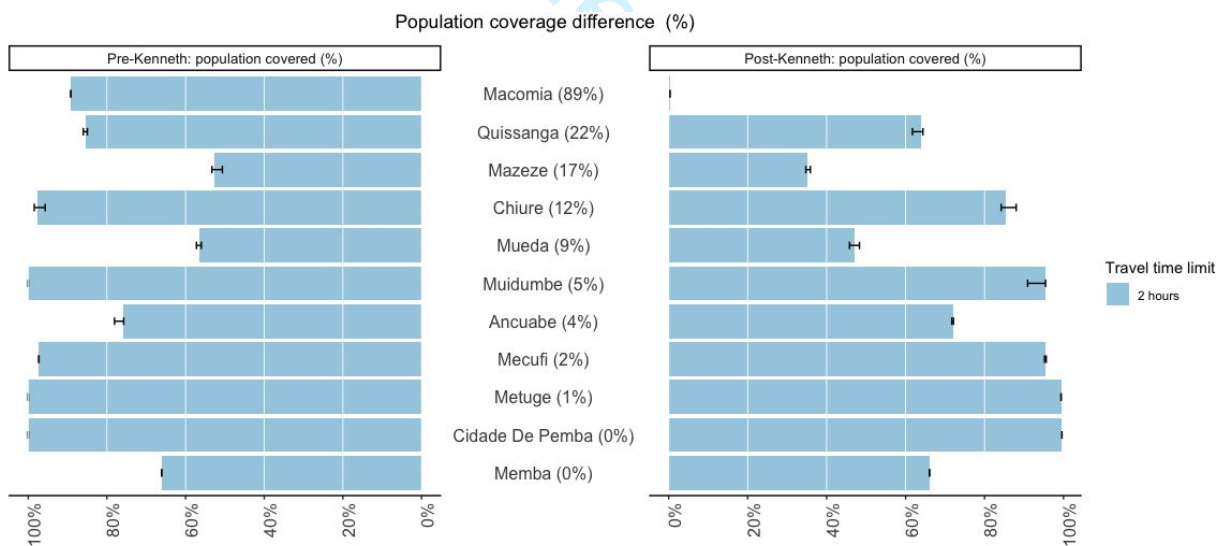

**Supplementary 5- Travel time per community in Idai affected districts. Fifty most affected communities by means of accessibility loss. Ordered on absolute travel time difference.**

| Community         | District  | Pre-cyclone travel time (h) | Post-cyclone travel time (h) | Difference pre- and post-cyclone (h) |
|-------------------|-----------|-----------------------------|------------------------------|--------------------------------------|
| Mucinemo          | Buzi      | 1.3                         | 63.6                         | 62.3                                 |
| Bupira            | Buzi      | 1.1                         | 62.3                         | 61.3                                 |
| Massuinda         | Buzi      | 1.2                         | 60.1                         | 58.9                                 |
| Njanga            | Buzi      | 4.3                         | 59.1                         | 54.7                                 |
| Guenje-Sede       | Buzi      | 2.9                         | 57.3                         | 54.4                                 |
| Mbereaizique      | Buzi      | 2.9                         | 57.3                         | 54.4                                 |
| Shinizia Chinhale | Muanza    | 24.0                        | 77.8                         | 53.8                                 |
| Chipota           | Muanza    | 24.4                        | 78.0                         | 53.6                                 |
| Wiriquizi         | Muanza    | 22.2                        | 74.1                         | 51.9                                 |
| Chingamuzi        | Muanza    | 22.7                        | 74.5                         | 51.8                                 |
| Mussacazwidje     | Buzi      | 3.5                         | 55.3                         | 51.8                                 |
| Mussacazwidje     | Buzi      | 3.5                         | 55.3                         | 51.8                                 |
| Magua             | Buzi      | 4.8                         | 56.6                         | 51.8                                 |
| Nkolone Praia     | Muanza    | 20.7                        | 72.3                         | 51.7                                 |
| Mukulumba 1       | Muanza    | 20.4                        | 71.8                         | 51.4                                 |
| Mukulumba cidade  | Muanza    | 20.2                        | 71.4                         | 51.2                                 |
| Nhanganga         | Muanza    | 19.9                        | 70.8                         | 50.9                                 |
| Mutanda           | Buzi      | 5.4                         | 55.3                         | 49.9                                 |
| Macova-Mutanda    | Buzi      | 6.3                         | 55.1                         | 48.9                                 |
| Puanda            | Buzi      | 2.9                         | 51.6                         | 48.7                                 |
| Luanda 1          | Muanza    | 18.8                        | 67.4                         | 48.6                                 |
| Nhamacalango      | Muanza    | 17.4                        | 65.8                         | 48.4                                 |
| Sengo             | Dondo     | 5.3                         | 53.5                         | 48.2                                 |
| Luanda 2          | Muanza    | 18.0                        | 65.8                         | 47.8                                 |
| Praia Nova        | Dondo     | 3.9                         | 51.5                         | 47.6                                 |
| Praia Farol       | Dondo     | 3.8                         | 51.4                         | 47.6                                 |
| Bingue Sede       | Muanza    | 16.4                        | 63.8                         | 47.4                                 |
| Nkonde 2          | Muanza    | 16.4                        | 63.8                         | 47.4                                 |
| Massitche         | Dondo     | 7.1                         | 54.5                         | 47.4                                 |
| Goonda Majaca     | Chibabava | 6.5                         | 53.3                         | 46.8                                 |
| Ngomole           | Muanza    | 10.1                        | 56.7                         | 46.6                                 |
| Ngalazi           | Dondo     | 6.0                         | 52.3                         | 46.3                                 |
| Nhacudjica        | Buzi      | 6.3                         | 52.4                         | 46.1                                 |
| Chitundo          | Dondo     | 2.0                         | 47.7                         | 45.7                                 |
| Macarate          | Chibabava | 5.3                         | 51.0                         | 45.7                                 |
| Nhamissassa       | Muanza    | 15.9                        | 61.5                         | 45.6                                 |
| Docue             | Buzi      | 5.7                         | 51.3                         | 45.6                                 |
| Khome 1           | Dondo     | 1.4                         | 46.8                         | 45.4                                 |
| Nherere 2         | Muanza    | 14.0                        | 59.0                         | 45.0                                 |
| Parange           | Buzi      | 3.6                         | 48.6                         | 45.0                                 |
| Njocho            | Buzi      | 5.9                         | 50.9                         | 45.0                                 |
| Binda             | Machanga  | 0.7                         | 45.2                         | 44.6                                 |
| Khome 2           | Dondo     | 0.6                         | 45.2                         | 44.6                                 |
| Veruca            | Chibabava | 4.1                         | 48.6                         | 44.5                                 |
| Mamunge           | Buzi      | 5.1                         | 49.2                         | 44.1                                 |
| Birirane          | Muanza    | 13.1                        | 57.2                         | 44.1                                 |
| Vala-vala         | Buzi      | 5.2                         | 49.2                         | 44.1                                 |
| Muche             | Gorongosa | 1.5                         | 45.5                         | 44.0                                 |
| Machiquire        | Buzi      | 2.6                         | 46.1                         | 43.5                                 |
| Nhazwicasse       | Gorongosa | 1.0                         | 44.5                         | 43.5                                 |

Supplementary 6- Travel time per community in Idai affected districts. Point locations of communities in Idai affected districts.

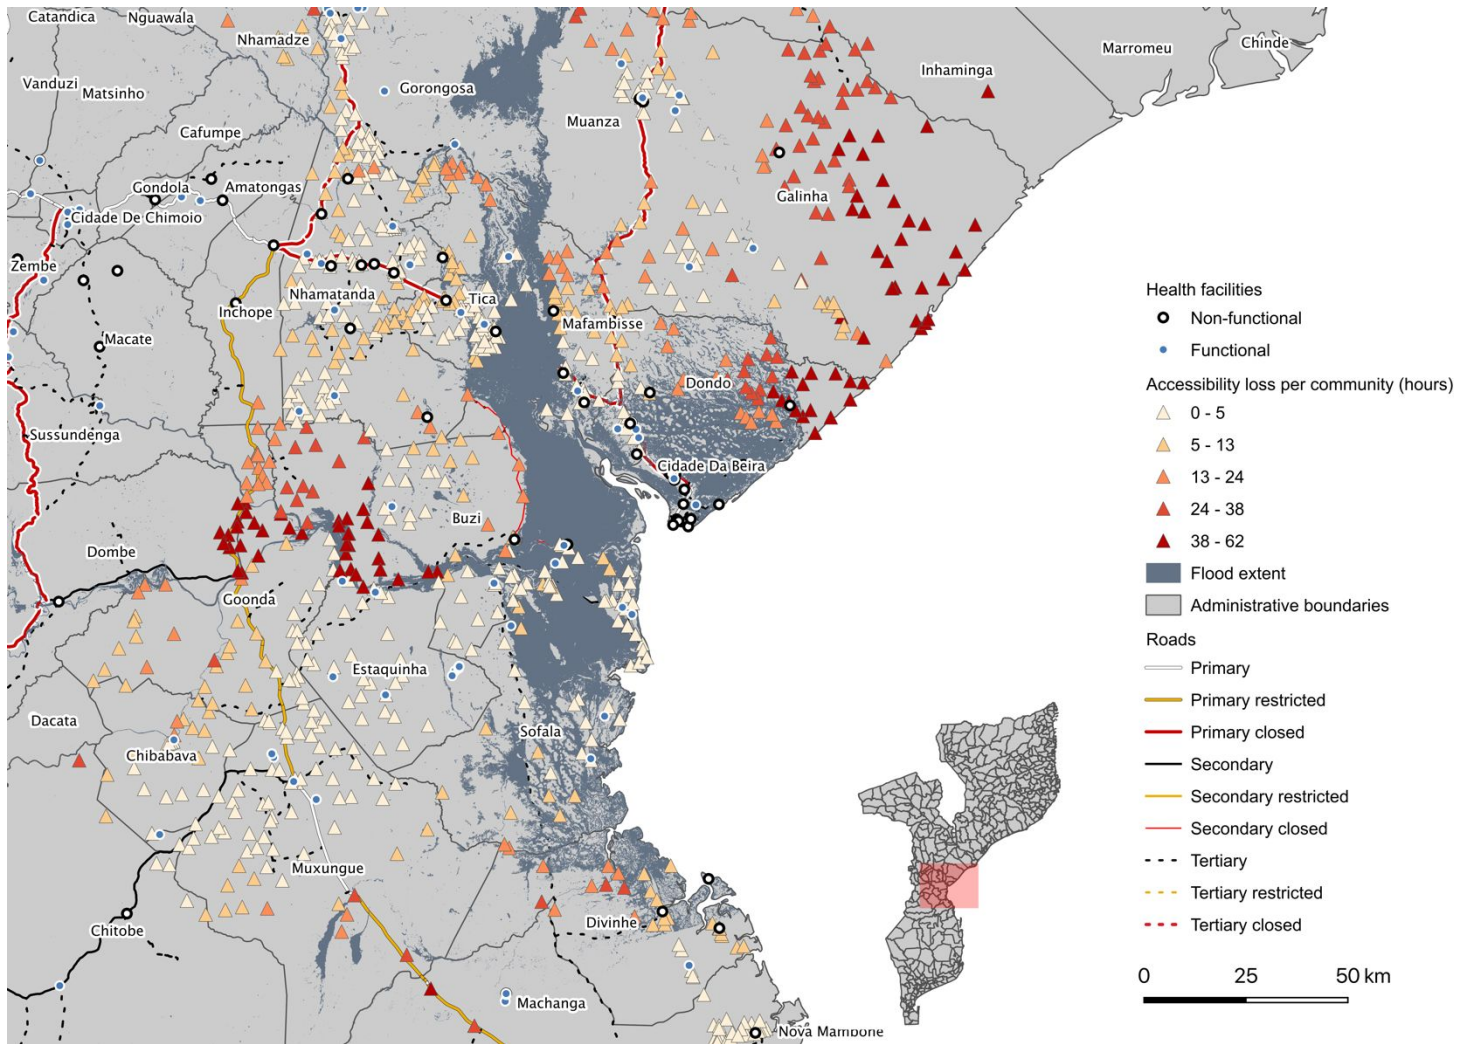

only

# BMJ Open

## Modelling geographical accessibility to support disaster response and rehabilitation of a health care system: An impact analysis of Cyclones Idai and Kenneth in Mozambique

|                                 |                                                                                                                                                                                                                                                                                                                                                                                                                                                                  |
|---------------------------------|------------------------------------------------------------------------------------------------------------------------------------------------------------------------------------------------------------------------------------------------------------------------------------------------------------------------------------------------------------------------------------------------------------------------------------------------------------------|
| Journal:                        | <i>BMJ Open</i>                                                                                                                                                                                                                                                                                                                                                                                                                                                  |
| Manuscript ID                   | bmjopen-2020-039138.R1                                                                                                                                                                                                                                                                                                                                                                                                                                           |
| Article Type:                   | Original research                                                                                                                                                                                                                                                                                                                                                                                                                                                |
| Date Submitted by the Author:   | 29-Jul-2020                                                                                                                                                                                                                                                                                                                                                                                                                                                      |
| Complete List of Authors:       | Hierink, Fleur; University of Geneva, Institute of Global Health; University of Geneva, Institute for Environmental Sciences<br>Rodrigues, Nelson; UNICEF Mozambique<br>Muñiz, Maria; United Nations Childrens Fund, Eastern and Southern Africa Regional Office<br>Panciera, Rocco; United Nations Childrens Fund, Health Section<br>Ray, Nicolas; University of Geneva, Institute of Global Health; University of Geneva, Institute for Environmental Sciences |
| <b>Primary Subject Heading</b>: | Health services research                                                                                                                                                                                                                                                                                                                                                                                                                                         |
| Secondary Subject Heading:      | Global health                                                                                                                                                                                                                                                                                                                                                                                                                                                    |
| Keywords:                       | International health services < HEALTH SERVICES ADMINISTRATION & MANAGEMENT, Organisation of health services < HEALTH SERVICES ADMINISTRATION & MANAGEMENT, Geographical mapping < TROPICAL MEDICINE, Risk management < HEALTH SERVICES ADMINISTRATION & MANAGEMENT                                                                                                                                                                                              |
|                                 |                                                                                                                                                                                                                                                                                                                                                                                                                                                                  |

SCHOLARONE™  
Manuscripts

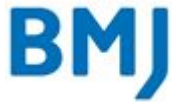

I, the Submitting Author has the right to grant and does grant on behalf of all authors of the Work (as defined in the below author licence), an exclusive licence and/or a non-exclusive licence for contributions from authors who are: i) UK Crown employees; ii) where BMJ has agreed a CC-BY licence shall apply, and/or iii) in accordance with the terms applicable for US Federal Government officers or employees acting as part of their official duties; on a worldwide, perpetual, irrevocable, royalty-free basis to BMJ Publishing Group Ltd ("BMJ") its licensees and where the relevant Journal is co-owned by BMJ to the co-owners of the Journal, to publish the Work in this journal and any other BMJ products and to exploit all rights, as set out in our [licence](#).

The Submitting Author accepts and understands that any supply made under these terms is made by BMJ to the Submitting Author unless you are acting as an employee on behalf of your employer or a postgraduate student of an affiliated institution which is paying any applicable article publishing charge ("APC") for Open Access articles. Where the Submitting Author wishes to make the Work available on an Open Access basis (and intends to pay the relevant APC), the terms of reuse of such Open Access shall be governed by a Creative Commons licence – details of these licences and which [Creative Commons](#) licence will apply to this Work are set out in our licence referred to above.

Other than as permitted in any relevant BMJ Author's Self Archiving Policies, I confirm this Work has not been accepted for publication elsewhere, is not being considered for publication elsewhere and does not duplicate material already published. I confirm all authors consent to publication of this Work and authorise the granting of this licence.

1  
2  
3  
4  
5  
6  
7  
8  
9  
10  
11  
12  
13  
14  
15  
16  
17  
18  
19  
20  
21  
22  
23  
24  
25  
26  
27  
28  
29  
30  
31  
32  
33  
34  
35  
36  
37  
38  
39  
40  
41  
42  
43  
44  
45  
46  
47  
48  
49  
50  
51  
52  
53  
54  
55  
56  
57  
58  
59  
60

## Modelling geographical accessibility to support disaster response and rehabilitation of a health care system:

### *An impact analysis of Cyclones Idai and Kenneth in Mozambique*

Fleur Hierink<sup>1,2</sup>, Nelson Rodrigues<sup>3</sup>, Maria Muñiz<sup>4</sup>, Rocco Panciera<sup>5</sup>, Nicolas Ray<sup>1,2</sup>

1. Institute of Global Health, Faculty of Medicine, University of Geneva, Geneva, Switzerland

2. Institute for Environmental Sciences, University of Geneva, Geneva, Switzerland

3. The United Nations Children's Fund, Mozambique, Maputo, Mozambique

4. The United Nations Children's Fund, Eastern and Southern Africa Regional Office, Nairobi, Kenya

5. The United Nations Children's Fund, Health Section, New York, United States of America

#### **CORRESPONDENCE:**

Fleur Hierink

[fleur.hierink@unige.ch](mailto:fleur.hierink@unige.ch)

GeoHealth group

Institute for Environmental Sciences

Office B401, UNI CARLVOGT

66 Bd Carl Vogt, 1205 Geneva

Switzerland

#### **KEYWORDS:**

International health services, organization of health services, geographical mapping, risk management

## 1 **ABSTRACT**

### 2 **Objectives**

3 Modelling and assessing the loss of geographical accessibility is key to support disaster  
4 response and rehabilitation of the health care system. The aim of this study was therefore  
5 to estimate post-disaster travel times to functional health facilities and analyze losses in  
6 accessibility coverage after Cyclones Idai and Kenneth in Mozambique in 2019.

### 7 **Setting**

8 We modeled travel time of vulnerable population to the nearest functional health facility in  
9 two cyclone-affected regions in Mozambique. Modelling was done using AccessMod 5,  
10 where roads, rivers, lakes, flood extent, topography, and land cover datasets were overlaid  
11 with health facility coordinates and high-resolution population data to obtain accessibility  
12 coverage estimates under different travel scenarios.

### 13 **Outcome measures**

14 Travel time to functional health facilities and accessibility coverage estimates were used to  
15 identify spatial differences between pre-disaster and post-disaster geographical  
16 accessibility.

### 17 **Results**

18 We found that accessibility coverage decreased in the flood affected districts, as a result of  
19 reduced travel speeds, road constraints and non-functional health facilities. In Idai-affected  
20 districts, accessibility coverage decreased from 78.8% to 52.5%, implying that 136,941  
21 children under 5 were no longer able to reach the nearest facility within 2 hours travel time.  
22 In Kenneth-affected districts, accessibility coverage decreased from 82.2% to 71.5%,  
23 corresponding to 14,330 children under 5 having to travel more than 2 hours to reach the  
24 nearest facility. Damage to transport networks and reduced travel speeds resulted in the  
25 most substantial accessibility coverage losses in both Idai and Kenneth-affected districts.

## 29 **Conclusions**

30 Post-disaster accessibility modelling can increase our understanding of spatial differences in  
31 geographic access to care in the direct aftermath of a disaster and can inform targeting and  
32 prioritization of limited resources. Our results reflect opportunities for integrating  
33 accessibility modelling in early disaster response, and to inform discussions on health  
34 system recovery, mitigation and preparedness.

## 36 **STRENGTHS AND LIMITATIONS OF THIS STUDY**

- 38 • This is the first study presenting the applicability of post-disaster geographical  
39 accessibility modelling.
- 40 • The approach enables quantification of disaster impacts on geographical health care  
41 accessibility to prioritize post-disaster interventions and to build resilience for future  
42 disasters.
- 43 • To account for uncertainty of the assumed travel speeds, we considered -20% and  
44 +20% intervals on motorized travel speeds.
- 45 • Data from various sources and administrative levels were combined to represent the  
46 post-cyclone situation as realistically as possible, but since data gathering was  
47 ongoing, it was expected that some data were incomplete or not fully processed at  
48 the time of usage.
- 49 • Our accessibility modelling assumes that patients always travel to the nearest health  
50 facility. However, literature has shown that patients sometimes bypass health  
51 facilities in search of higher quality care in Mozambique.



## 1. INTRODUCTION

Geographical proximity to health facilities is a crucial aspect of accessibility, utilization and the provision of health services to populations in need<sup>1</sup>. Road networks and natural barriers (such as rivers, water bodies, and flooded areas) are important factors that determine the geographical (i.e. physical) accessibility of a population to the network of functional health facilities. During natural disasters, roads and health facilities are often damaged, yet health care demand rises substantially at the same time due to injuries and increased communicable disease risks<sup>2,3</sup>. The interplay between the disruption of health infrastructure, transport network, and the rise in health care demand, is known to disable a large portion of the population's access to care they need in the aftermath of a disaster<sup>3,4</sup>. This is especially the case in already medically underserved regions, where the event can lead to new health disparities or exacerbate existing ones<sup>2</sup>.

In March and April 2019, two cyclones made landfall in Mozambique. This was the first time in history that two strong cyclones hit Mozambique consecutively in the same season<sup>5</sup>. On 14 March 2019 Tropical Cyclone Idai made landfall in Beira, followed by a week of heavy rains and winds, the storm ended on 21 March 2019<sup>6</sup>. In the middle of the humanitarian emergency response for Cyclone Idai, a second cyclone hit Northern Mozambique. Cyclone Kenneth, a category 4 cyclone and the strongest recorded cyclone on the African continent, made landfall in Pemba, Cabo Delgado on 25 April 2019<sup>7,8</sup>. The two cyclones combined had a death toll of 648, with 603 fatalities due to Idai and 45 deaths caused by Kenneth, and left over 2.2 million people in need of humanitarian assistance<sup>5</sup>. The cyclone's destruction isolated entire communities for weeks due to flood waters, destroyed telecommunication networks, and extensive road damage<sup>9,10</sup>. In addition, stagnant waters, inability in accessing safe water and sanitation, and overcrowding in temporary accommodation led to a cholera outbreak and a significant increase in malaria cases<sup>5,8,11,12</sup>. Major damage to 113 health facilities were reported after both cyclones, causing severe disruption in health service provision and restricting the population's access to adequate health care<sup>13,14</sup>. Although many humanitarian actors have estimated substantial losses in health care accessibility and availability<sup>5,9,10,13,15</sup>, the quantitative impact of Cyclone Idai and Kenneth on geographical accessibility to health care remains unknown.

1  
2  
3 83 Since 2005 the humanitarian sector applies a *cluster approach* to coordinate emergency  
4 operations between all humanitarian response organizations involved<sup>16</sup>. This means that  
5 84 all humanitarian organizations are cooperating in the main sectors of humanitarian action  
6  
7 85 (e.g. water, health, logistics) and have clear responsibilities for coordination<sup>16</sup>. A post  
8  
9 86 disaster needs assessment (PDNA) is the first step in the humanitarian response cycle to  
10  
11 87 formulate a disaster response and recovery plan<sup>17</sup>. Guidelines from the World Health  
12  
13 88 Organization (WHO) for a PDNA for the health cluster specifically, advise on a comparison  
14  
15 89 between baseline and post-disaster accessibility through the evaluation of key indicators in  
16  
17 90 their presented framework<sup>18</sup>. However, the suggested key indicators reflect rather static  
18  
19 91 measures of accessibility, such as hospital beds per 10,000 population or number of  
20  
21 92 damaged health facilities<sup>18</sup>. Yet, international efforts to support humanitarian responses on  
22  
23 93 the ground accelerate post-disaster data gathering, enabling a more realistic quantification  
24  
25 94 of accessibility to health care by means of health facility damages, loss of road access, and  
26  
27 95 barriers to movement such as flood waters<sup>19</sup>. Guidance on assessing loss in geographical  
28  
29 96 accessibility while considering spatial barriers remains abstract or even lacking in disaster  
30  
31 97 management frameworks. Meanwhile, geographical accessibility models hold actionable  
32  
33 98 information and have the potential to quantify gaps and overlaps in (temporary) service  
34  
35 100 provisioning, enabling coordinated, targeted and centralized decision making for  
36  
37 101 humanitarian action<sup>20</sup>, enhancing both financial and operational efficiency<sup>21,22</sup>.

38 102

39  
40 103 This study therefore presents a data processing and spatial accessibility modelling method  
41  
42 104 to assess post-disaster accessibility to health facilities and analyze accessibility coverage  
43  
44 105 losses as a result of cyclones Idai and Kenneth in Mozambique. The approach enables  
45  
46 106 quantification of disaster impacts on geographical health care accessibility to prioritize post-  
47  
48 107 disaster interventions and to build resilience for future disasters. This is the first study  
49  
50 108 presenting the applicability of post-disaster geographical accessibility modelling.

51 109

## 52 110 **2. METHODS**

### 53 111 **2.1 Overall methodology**

54  
55 112 In this study, *accessibility* is measured as the travel time to health facilities and *accessibility*  
56  
57 113 *coverage* (i.e. coverage) is defined as the estimated number or percentage of people  
58  
59 114 covered or located within a travel time catchment area<sup>23</sup>. To model accessibility to health

115 facilities, we consider topography, road networks, constraints to movement (e.g. rivers,  
 116 lakes and flood extent), target population distribution, and the locations of functional health  
 117 facilities. We accessed and prepared multiple data layers (Table 1) assembled in the  
 118 aftermath of Cyclone Idai and Kenneth, between April-September 2019. A total of three  
 119 scenarios were prepared, representing 1) pre-Idai and pre-Kenneth (before March 2019), 2)  
 120 post-Idai (up to one-week post-cyclone), and 3) post-Kenneth (up to one-week post-cyclone)  
 121 situations. We modeled population travel time to the nearest health facility and accessibility  
 122 coverage, for two cyclone-affected regions.

123

124 **Table 1** – Overview of data layers and data sources

| Layer name                        | Source <sup>a</sup>                                              | Source date <sup>b</sup>                                        | Download date | Type     | Original resolution |
|-----------------------------------|------------------------------------------------------------------|-----------------------------------------------------------------|---------------|----------|---------------------|
| Administrative boundaries         | <a href="#">INE &amp; UN-OCHA ROSEA (HDX)</a> <sup>24</sup>      | 02.04.19                                                        | 31.07.19      | Polygon  | -                   |
| Cyclone trajectory (Idai/Kenneth) | GDACS <sup>25,26</sup>                                           | <a href="#">15.03.19/25.04.19</a>                               | 08.03.2020    | Polygon  | -                   |
| Land cover                        | <a href="#">Copernicus</a> <sup>27</sup>                         | 15.11.18                                                        | 31.07.19      | Raster   | 100 meters          |
| Elevation                         | <a href="#">SRTM CGIAR</a> <sup>28</sup>                         | 25.11.18                                                        | 20.09.19      | Raster   | 30 meters           |
| Rivers and lakes                  | DNGRH                                                            | 12.8.19                                                         | 19.9.19       | Polygon  | -                   |
| Primary streams                   | DNGRH                                                            | 12.8.19                                                         | 19.9.19       | Lines    | -                   |
| Flood extent, Idai                | UNOSAT/ <a href="#">Sentinel-1 (HDX)</a> <sup>29</sup>           | 19.03.19                                                        | 31.07.19      | Polygon  | -                   |
| Flood extent, Kenneth             | <a href="#">Copernicus EMSR354 (INGC Geonode)</a> <sup>30</sup>  | 02.05.19                                                        | 31.07.19      | Polygon  | -                   |
| Roads                             | <a href="#">OpenStreetMap (INGC Geonode)</a> <sup>31</sup>       | 25.11.18                                                        | 07.08.19      | Lines    | -                   |
| Road damages (Idai/Kenneth)       | <a href="#">LOG-WFP</a> <sup>32,33</sup>                         | <a href="#">19.03.19/03.05.19</a>                               | 23.09.19      | PDF file | -                   |
| Health facilities                 | <a href="#">SIS-MA (HDX)</a> <sup>34</sup>                       | 31.12.17                                                        | 08.08.19      | Points   | -                   |
| Health facilities damages         | Provided by WHO-Mozambique                                       | Represents health facility status 48h until 1 week post cyclone | 17.09.19      | Points   | -                   |
| Population density                | <a href="#">Facebook/CIESIN population density</a> <sup>35</sup> | 01.10.18                                                        | 06.08.19      | Raster   | 30 meters           |

125 <sup>a</sup> Abbreviations: CIESN = Center for International Earth Science Information Network, DNGRH = National Directorate for  
 126 Water Resource Management, HDX = Humanitarian Data Exchange, GDACS = Global Disaster Alert and Coordination  
 127 System, INE = National Institute for Statistics Mozambique, INGC = National Institute for Disaster Management  
 128 Mozambique, SIS-MA = Ministry of Health Mozambique, SRTM = Shuttle Radar Topography Mission, UN-OCHA ROSEA =  
 129 United Nations Office for the Coordination of Humanitarian Affairs Southern and Eastern Africa, UNOSAT = United Nations  
 130 Operational Satellite Applications Program, LOG-WFP = Logistics Cluster World Food Program

1  
2  
3 131 <sup>b</sup> Source date represents the imagery acquisition date for the flood extents and the release date for all other data<sup>2.2</sup>  
4

## 5 132 **Data sources and preparation**

6  
7 133 The projection, resolution and alignment of geospatial data was processed using Quantum  
8  
9 134 Geographical Information System (QGIS) (version 3.4)<sup>36</sup> and, to a limited extent, R (version  
10  
11 135 3.5.2)<sup>37</sup>. As indicated in Table 1, most data layers were retrieved from open data platforms.  
12  
13 136 All rasters and shapefiles were saved in the projection system of Mozambique, i.e. UTM-37S  
14  
15 137 [EPSG:32737]. The data preparation process is briefly described below, and fully detailed in  
16  
17 138 Supplement 1.  
18

19  
20 140 Elevation data were obtained from the Shuttle Radar Topography Mission (SRTM) in tiles at  
21  
22 141 a resolution of 30 meters and mosaiced to cover the whole country<sup>38</sup>. Slopes were derived  
23  
24 142 from it and accounted for when modelling walking movements.  
25

26  
27 144 Land cover data was downloaded for the whole African continent at 100 meter resolution  
28  
29 145 from Copernicus Global Land Service<sup>27</sup> and was clipped to the extent of Mozambique. As  
30  
31 146 analyses were carried out at 30-meter resolution the land cover raster was resampled at a  
32  
33 147 resolution of 30 meters, using nearest neighbor interpolation.  
34

35  
36 149 The pre-cyclone road network dataset was retrieved from Open Street Map (OSM) through  
37  
38 150 the Geonode Platform of the National Institute for Disaster Management Mozambique  
39  
40 151 (INGC), and linked to the road damage information as indicated by the Logistics Cluster of  
41  
42 152 the World Food Program (LOG-WFP)<sup>39,40</sup>. Historical post-cyclone status of roads and road  
43  
44 153 segments were manually digitized from PDF maps provided by LOG-WFP. The maps were  
45  
46 154 cross-referenced with the OSM road network layer, to include post-cyclone road damage  
47  
48 155 status, (i.e. 1) open, 2) restricted, and 3) closed). Road damages as a consequence of  
49  
50 156 cyclones Idai and Kenneth were taken from maps dated March 19 and May 3, 2019,  
51  
52 157 respectively (Table 1)<sup>39,40</sup>. Information on road type and damage were combined in order to  
53  
54 158 obtain unique road type-damage combinations (Supplement 2).  
55

56  
57 160 Information on rivers and lake layout were obtained as shapefiles from the National  
58  
59 161 Directorate for Water Resource Management (DNGRH). Only primary rivers and lakes were  
60  
162 considered as barriers to movement, under the informed assumption that smaller rivers and

1  
2  
3 163 streams were passable by the population. This assumption was checked for several  
4  
5 164 instances against background satellite imagery. Flood extents for Idai (on 19 March 2019)<sup>29</sup>  
6  
7 165 and Kenneth (on 2 May 2019)<sup>30</sup> were sourced as shapefiles from Sentinel-1 and Copernicus  
8  
9 166 EMSR354, respectively. The flood extents were visually inspected and found to be largest on  
10  
11 167 those two dates, and thus represent the biggest constraints for health care access. All  
12  
13 168 flooded areas were treated under two scenarios: 1) as being impassable, under the  
14  
15 169 assumption that people avoid traversing flood water to prevent further injury, 2) as being  
16  
17 170 passable by foot at an average walking speed of 1.5 km/h. In the first scenario, health  
18  
19 171 facilities located on flood extents were always treated as inaccessible since they are located  
20  
21 172 on barriers.

22 173

23 174 While cyclones impact entire populations, the burden disproportionately affects children  
24  
25 175 and women <sup>41</sup>. It is estimated that for cyclones Idai and Kenneth more than 50% of the  
26  
27 176 affected population were children, and with flood waters rising above 6 meters, their  
28  
29 177 movements to safety and health care were particularly limited <sup>5</sup>. Moreover, children under  
30  
31 178 5 represent the age group used as benchmark for child survival targets in both the  
32  
33 179 Millennium Development Goals (MDGs) and the Sustainable Development Goals (SDGs), as  
34  
35 180 such this cohort is frequently used as baseline<sup>42</sup>. In this context and through the  
36  
37 181 collaborative work with UNICEF, this analysis aimed at informing the impact of the disasters  
38  
39 182 on the burden for specific child health services that target children under 5, (e.g.  
40  
41 183 immunization). We therefore focused our analyses on children under 5.

42 184

43 185 High-resolution population density estimates for children under five were obtained from the  
44  
45 186 Facebook Connectivity Lab and Center for International Earth Science Information Network  
46  
47 187 (CIESN)<sup>35</sup> with a 30-meter resolution. Although several gridded populations datasets are  
48  
49 188 available, the Facebook CIESN dataset was assumed to have the most realistic reallocation  
50  
51 189 of population to settlements<sup>43</sup>. In addition, other frequently used high resolution gridded  
52  
53 190 population datasets, such as WorldPop<sup>44</sup>, use distances from roads and villages as  
54  
55 191 covariates, and this can produce collinearity when used in conjunction with accessibility  
56  
57 192 models. Population density was used to run zonal statistics on the cyclone-affected districts.  
58  
59 193 In this step the total population per district is summed and the estimated absolute number  
60

1  
2  
3 194 of children under 5 that are able to reach a facility in a pre-defined travel time catchment  
4  
5 195 are calculated.  
6

7 196

8  
9 197 Additionally, geographic coordinates of all villages (i.e. communities) in Idai-affected  
10  
11 198 districts were obtained from UNICEF Mozambique, which had gathered this information  
12  
13 199 through a community mapping initiative conducted by health officials, 6 to 8 months before  
14  
15 200 Cyclone Idai made landfall. These community locations were used to extract pre- and post-  
16  
17 201 cyclone travel time for each community to the nearest functional health center.

18 202 Unfortunately, geographic coordinates of villages in Kenneth-affected districts were not  
19  
20 203 available at the time of study.  
21

22 204

23 205 The geographic coordinates of all health facilities were sourced from the health  
24  
25 206 management information system, Ministry of Health in Mozambique (SIS-MA). Data  
26  
27 207 cleaning was undertaken in cases where the geographic coordinates for health facilities  
28  
29 208 were located outside the international border of Mozambique or for coordinates falling on  
30  
31 209 barriers to movement (Supplement 1). Information on damaged health facilities was  
32  
33 210 provided in tabular format by the World Health Organization (WHO). The health system in  
34  
35 211 Mozambique comprises 4 levels; the primary level consists of urban and rural health  
36  
37 212 centers, the secondary level consists of general, rural and district hospitals, the tertiary level  
38  
39 213 comprises provincial capital hospitals, and quaternary facilities comprise the central and  
40  
41 214 specialized hospitals<sup>45</sup>. Health facilities of all levels were included in the model.  
42

43 215

44 216 Districts that were most affected by Cyclones Idai and Kenneth ("cyclone-affected districts",  
45  
46 217 thereafter) were identified in close collaboration with UNICEF and humanitarian responders.  
47  
48 218 All statistics presented below were calculated for these identified districts, with 26 such  
49  
50 219 districts in the Idai-affected region and 11 districts in the Kenneth-affected region (Figure 1a  
51  
52 220 & 1b). Storm trajectories of both cyclones and road damages in both districts are also  
53  
54 221 presented (Figure 1c-1f).  
55

56 222

### 57 223 **2.3 Geographical accessibility modelling**

58 224 To model travel times and accessibility coverages, we used AccessMod 5 (version 5.6.30), in  
59  
60 225 particular the "accessibility" and "zonal statistics" modules<sup>23,46</sup>. AccessMod models

1  
2  
3 226 geographic accessibility using terrain-based least-cost path distance calculation. This open-  
4  
5 227 source software has been successfully applied in many different settings, among which  
6  
7 228 accessibility and referral assessments of health facility networks, optimization modelling of  
8  
9 229 health programs in obstetric and neonatal care (EmONC)<sup>47</sup>, primary health care<sup>48</sup>,  
10  
11 230 emergency care<sup>49</sup>, referral times<sup>50</sup>, and treatment of fever cases<sup>51</sup>.

12 231

14 232 Using the “merge land cover” module in AccessMod, we overlaid the roads, rivers, lakes,  
15  
16 233 flood extent, and landcover datasets to obtain a single 30-m resolution raster dataset, to  
17  
18 234 which different travel scenarios were applied.

19 235

21 236 The travel scenarios (presented in Supplement 2) were derived using local information as  
22  
23 237 model inputs on pre-cyclone and post-cyclone travel speeds and travel modes. Both  
24  
25 238 scenarios were developed in close collaboration with UNICEF Mozambique, with focus on  
26  
27 239 geographical accessibility to functional health facilities for the target population of children  
28  
29 240 under 5. Post-cyclone travel speeds were adjusted for wet weather conditions as heavy  
30  
31 241 rains persisted in the direct aftermath of both cyclones. During the post-cyclone situation,  
32  
33 242 restricted and closed roads that were not inundated were assumed to be unpassable by any  
34  
35 243 vehicle; but they were perceived to be accessible by foot. All landcover classes outside of  
36  
37 244 the road network and the barriers were considered as passable. We assumed a functional  
38  
39 245 bridge where a road segment crossed a river.

40 246

41 247 To account for uncertainty of the assumed travel speeds, we also considered both pre- and  
42  
43 248 post-cyclone motorized travel speeds with a 20% slower and 20% faster speed, as adapted  
44  
45 249 from Ouma et al.<sup>49</sup>. Accessibility coverage of the network of health centers was calculated at  
46  
47 250 the 2-hour maximum travel time limit. This limit was deemed appropriate to capture the  
48  
49 251 extent of effective access, and is often used in health accessibility studies, notably in  
50  
51 252 maternal health<sup>47</sup>.

52 253

---

54 254 **FIGURE 1**

56 255

58 256

## 257 **2.4 Patients and the public involvement**

258 There was no patient or public involvement in this study. Health facility functionality status  
259 was shared in tabular format by WHO. All other geospatial data were publicly available.

260

## 261 **3. RESULTS**

262 All statistics mentioned in the results are estimates of children covered by functional health  
263 facilities based on our accessibility model.

264

### 265 **3.1 Pre-cyclone accessibility**

266 Pre-cyclone coverage in Idai-affected districts (Figure 2a) was highest in Cidade De Chimoio  
267 and Cidade Da Beira, with 99.8% and 99.5% of all children under 5 covered within the 2 hour  
268 catchment limit, respectively (Supplement 3). However, this coverage ranged from 35.8-  
269 99.8% in all Idai-affected districts (Supplement 3). Absolute pre-cyclone coverage was also  
270 highest in Cidade De Chimoio and Cidade Da Beira, where 57,476, and 66,135 children were  
271 within 2 hours travel time from a health facility (Figure 2). In Kenneth-affected districts  
272 (Figure 2b), pre-cyclone coverage was highest in Cidade De Pemba, where 100% of the  
273 children under 5 were expected to be able to reach a health facility within 2 hours travel  
274 time (Supplement 4). The lowest pre-cyclone coverage was seen in Mazeze, where only  
275 52.6% of children under 5 were within 2 hours travel time from a health facility (Supplement  
276 4). Absolute pre-cyclone coverage in Kenneth-affected districts was highest in Cidade De  
277 Pemba (n = 35,467 children) and Chiure (n= 18,257 children) (Figure 2). Pre-cyclone travel  
278 time rasters for the cyclone-affected areas were mapped (Figure 3A & Figure 4A).

279

---

280 **FIGURE 2**

---

281

282

### 283 **3.2 Losses in accessibility coverage**

284 Geographical accessibility to health care decreased in the cyclone-affected districts, as a  
285 result of reduced travel speeds, road constraints and non-functional health facilities (Figure  
286 3B and Figure 4B). Ratios of pre-cyclone and post-cyclone travel time rasters are mapped for  
287 Idai-affected districts, with ratios close to 1 indicating similar travel times pre- and post-  
288 cyclone, and ratios closer to 0 indicating large pre- and post-cyclone accessibility differences



(Figure 3C). The same results for Kenneth-affected districts are presented (Figure 4C). Regions shown in red indicate localities with relatively large differences between pre- and post-cyclone travel times (Figure 3C). In the Idai-affected region, especially in the districts surrounding the flood water and closed roads, accessibility is severely impacted. In Idai-affected districts, the percentage of children under 5 covered within 2 hours travel time, generally decreased from 78.8% to 52.5%, implying that 136,941 previously covered children under 5, lost timely access to health care (Table 2).

**Table 2-** Overview of pre- and post-cyclone accessibility coverage in Idai and Kenneth-affected districts.

| Cyclone | Travel time | Pre-cyclone               |                         | Post-cyclone              |                         |                                 |                               |
|---------|-------------|---------------------------|-------------------------|---------------------------|-------------------------|---------------------------------|-------------------------------|
|         |             | Children <5 covered (nr.) | Children <5 covered (%) | Children <5 covered (nr.) | Children <5 covered (%) | Children <5 coverage loss (nr.) | Children <5 coverage loss (%) |
| Idai    | 30 minutes  | 298,432                   | 57.3                    | 153,842                   | 29.5                    | 144,591                         | 27.7                          |
|         | 1 hour      | 346,409                   | 66.5                    | 206,610                   | 39.6                    | 139,799                         | 26.8                          |
|         | 2 hours     | 410,696                   | 78.8                    | 273,755                   | 52.5                    | 136,941                         | 26.3                          |
| Kenneth | 30 minutes  | 131,120                   | 72.0                    | 63,953                    | 48.8                    | 304,15                          | 23.2                          |
|         | 1 hour      | 99,056                    | 73.8                    | 86,997                    | 64.8                    | 12,060                          | 9.0                           |
|         | 2 hours     | 110,348                   | 82.2                    | 96,019                    | 71.5                    | 14,330                          | 10.7                          |

The largest relative accessibility coverage decline, within 2 hours travel time, was observed in Machanga, where 77.6% of the previously covered population was no longer able to access a facility under 2 hours in the aftermath of Idai (Figure 2). In terms of absolute coverage, Nhamatanda was the most affected district, with a coverage loss of 25,121 children under 5, followed by Morrumbala (n = 19,554 children), Cidade Da Beira (n = 17,355 children), and Buzi (n= 9,949 children) (Figure 2). Uncertainty modelling, by accounting for 20% slower and 20% faster motorized travel speeds<sup>49</sup>, indicated localities with travel time differences up to 3-hours comparing slower and faster travel speeds (Figure 3D & Figure 4D). This information indicates where our travel time assumptions have the largest effect on accessibility and coverage losses and where this may be either under- or overestimated based which can help guide resource allocation for decreasing this uncertainty.

1  
2  
3 313 Relative accessibility coverage in all Kenneth-affected districts decreased from 82.2% to  
4  
5 314 71.5%, corresponding to 14,330 children having lost access to the nearest facility within 2  
6  
7 315 hours travel time (Table 2). The most affected district in terms of relative coverage loss was  
8  
9 316 Macomia, where 88.9% of the children that were covered pre-cyclone lost access  
10  
11 317 (Supplement 3 & 4). Mazeze was the most affected district in terms of absolute coverage  
12  
13 318 loss, as 5,496 children lost access in the aftermath of cyclone Kenneth, followed by  
14  
15 319 Macomia (n= 3,727 children), Chiure (n= 2,307 children), Quissanga (n= 1,270 children) and  
16  
17 320 Mueda (n= 750 children) (Figure 2).

18 321  
19  
20 322 Since flood waters slowly receded in the days/weeks after the cyclones, we ran an  
21  
22 323 additional scenario where flood waters were passable at a 1.5km/h walking speed.  
23  
24 324 Considering this scenario, absolute coverage losses for Idai-affected districts within 2 hours  
25  
26 325 travel time were highest in Morrumbala (n= 29,566 children), Nhamatanda (n= 25,758  
27  
28 326 children), Dacata (n= 8,914 children), and Bùzi (n= 8,757 children). In Kenneth-affected  
29  
30 327 districts, Mazeze (n= 6,167 children), Chiure (n= 4,684 children) and Macomia (n= 3,727  
31  
32 328 children) had the highest coverage losses in 2 hour catchments under the passable scenario.

### 330 3.3 Travel time in affected communities

331 The most affected villages in Idai-affected districts, in terms of reduced accessibility to the  
332 nearest health facility were communities located in Bùzi and Muanza districts in Sofala  
333 province. Mucinemo in Bùzi district was found to have a pre-cyclone travel time of 1.3 hours  
334 to the nearest health facility. However, this travel time upsurged to 63.6 hours in the direct  
335 aftermath of cyclone Idai (Supplements 5 & 6). Generally, the 6 most affected communities  
336 in terms of accessibility in Idai-affected districts all had a pre-cyclone travel time between 1  
337 hour and 3 hours, while all post-cyclone travel times increased to over 55 hours  
338 (Supplement 6). Overall, post-cyclone accessibility ranged from some minutes up to 78  
339 hours, with the highest travel time found in Chipota, in Muanza district.

340  
341  
342  
343

---

FIGURE 3 & 4

---

### 3.4 Health facility closures

1  
2  
3 344 The effect of non-functioning health facilities were isolated by comparing two separate  
4  
5 345 scenarios; 1) a post-cyclone scenario where all health facilities were considered functional,  
6  
7 346 and 2) a post-cyclone scenario where modified functionality status was considered. By  
8  
9 347 comparing these pre-cyclone and post-cyclone scenarios, the coverage losses caused by the  
10  
11 348 transportation-specific disruptions (i.e. adjusted travel speeds and road constraints) could  
12  
13 349 be isolated from the reduction in coverage due to the damage to health facilities (i.e. non-  
14  
15 350 functional health facilities), providing a way to assess the likely impact of future programs  
16  
17 351 aimed at reinforcing health facilities for disasters. In order to make these comparisons in  
18  
19 352 this specific example, both scenarios were run under the assumption that flood waters were  
20  
21 353 fully passable. In all other instances throughout the paper, flood waters were considered  
22  
23 354 impassable. In case all health facilities remained functional in Idai-affected districts (i.e.  
24  
25 355 disruption was due to transportation only), the overall coverage within 2 hours travel time  
26  
27 356 would decrease from 79.3% to 57.7%, a difference of 21.6% (n = 112,538 children). Damage  
28  
29 357 to health facilities caused an additional coverage decline of 5.3% (n = 27,840 children) in  
30  
31 358 Idai-affected districts. However, hospital closures did not evenly affect all districts. In 17 out  
32  
33 359 of 26 Idai-affected districts, hospital closures had no additional effect on accessibility.  
34  
35 360 However, in the remaining 9 Idai-affected districts, hospital closures were responsible for an  
36  
37 361 additional 1.9-59.7% coverage loss within 2 hours catchment. Health facility closures in  
38  
39 362 Machanga affected the relative coverage the most, with 59.7% coverage loss (n= 3,642  
40  
41 363 children) caused by non-functionality of 3 out of 6 health facilities. Absolute coverage losses  
42  
43 364 as an effect of non-functional health facilities, were highest in Nhamatanda, where 12,946  
44  
45 365 (31.0%) children under 5 years old lost access due to health facility closures. In  
46  
47 366 Nhamatanda, 9 out of 16 health facilities became unfunctional as a consequence of Cyclone  
48  
49 367 Idai. Health facility closures did not have an additional effect on post-cyclone accessibility in  
50  
51 368 Kenneth-affected districts.

369

#### 370 **4. DISCUSSION**

371 Accessibility coverage decreased and travel times substantially increased, in the direct  
372  
373 aftermath of the cyclones. Damage to transport networks and reduced travel speeds  
374  
375 resulted in the most substantial accessibility coverage losses in both Idai- and Kenneth-  
affected districts. In Kenneth-affected districts, it was found that hospital closures did not  
have an additional effect on post-cyclone accessibility this is likely caused by the fact that

1  
2  
3 376 flood extents and hospital closures were of much smaller magnitudes in the Kenneth-  
4  
5 377 affected region than in the Idai-affected region.

6  
7 378 In a post-disaster setting, access to health care is essential for effective response and  
8  
9 379 recovery<sup>52</sup>. The results of our study can be implemented beyond the response phase of the  
10  
11 380 cyclones. Although the emphasis of the results is on identification of decreased accessibility  
12  
13 381 coverage directly after the cyclones, the information presented here also provides a  
14  
15 382 platform for discussing health system recovery, mitigation and preparedness<sup>53</sup>.

16 383  
17  
18 384 Early identification of underserved districts in the response phase can help reduce the  
19  
20 385 impacts caused by health service interruption, through targeted deployment of medical  
21  
22 386 services in districts with largest accessibility coverage losses and lowest baseline  
23  
24 387 accessibility<sup>54</sup>. Information on accessibility coverage losses per cyclone-affected district can  
25  
26 388 support decision-making in the prioritization and planning of these medical services, by  
27  
28 389 targeting where the deployment of medical services reaches the highest number of people.  
29  
30 390 Growing access to open data and post-disaster information enables prompt accessibility  
31  
32 391 modelling in the aftermath of a natural disaster and the growing ability to quickly assemble  
33  
34 392 this data provides an opportunity to integrate accessibility modelling in the early response  
35  
36 393 phase of a natural disaster, so resources can be allocated in an informed way and health  
37  
38 394 impacts can be reduced. In this specific study, all data for an initial post-cyclone accessibility  
39  
40 395 study became available between 1 week and 1 month post-disaster (Table 1). This allows for  
41  
42 396 an accessibility analysis in the early stages of a disaster response. Generally, data on flood  
43  
44 397 extents and road damages, acquired from satellite imagery, were downloadable within 1  
45  
46 398 week post-disaster. Whereas information that had to be ground validated, such as health  
47  
48 399 facility functionality, became available approximately 1 month post-disaster.

49 400  
50  
51 401 Furthermore, the extensive damages to the road network will continue to limit movements  
52  
53 402 of the population, further complicating physical accessibility<sup>5</sup>. Our results indicate that road  
54  
55 403 damages are responsible for a relatively large loss of accessibility. This calls for a concerted  
56  
57 404 effort between road and health authorities when prioritizing reconstruction efforts. It was  
58  
59 405 estimated by WHO that damages to (health) infrastructure translated into 200,000 people  
60  
406 living more than 5 kilometers from a functioning health facility<sup>55</sup>. However, our results,  
407  
which provide a more realistic representation of accessibility, by accounting for topography,

1  
2  
3 408 barriers to movement, and population distribution, suggest this figure is an underestimate.  
4  
5 409 We estimated that as a result of the damage to infrastructure and barriers to movement,  
6  
7 410 314,591 children under 5 live further than 1 hour travelling from a functioning health  
8  
9 411 facility.  
10  
11 412  
12 413 Fourteen percent of all health facilities in Cyclone Idai- and Kenneth-affected cyclone-  
13  
14 414 districts have been damaged or fully destroyed, although more health facilities were  
15  
16 415 temporarily impacted in service provisioning due to flooding, electricity constraints or  
17  
18 416 damage to equipment<sup>14,56</sup>. While it is critical to restore access to essential health services as  
19  
20 417 soon as possible, the WHO reported that the reconstruction of all destructed and damaged  
21  
22 418 facilities may take up to 5 years<sup>14</sup>. To restore baseline accessibility, the establishment of  
23  
24 419 mobile outreach units, deployment of community health workers (CHWs), together with the  
25  
26 420 reconstruction of damaged facilities should be implemented. However, under the umbrella  
27  
28 421 of *Building Back Better* (BBB), rebuilding more resilient facilities and infrastructure, that are  
29  
30 422 able to withstand future hazards under the “Hospitals Safe from Disasters” approach, are  
31  
32 423 needed to prevent similar impacts in future disasters<sup>55,56</sup>. The results presented here show  
33  
34 424 the importance of joint efforts to reduce both impacts on health facilities and the existing  
35  
36 425 road network. However, resources are limited, and efficient financial planning is needed to  
37  
38 426 outline health system investment plans<sup>5,11</sup>. The results of our accessibility modelling can be  
39  
40 427 used to prioritize health facility reconstruction for facilities with highest accessibility  
41  
42 428 coverages. Cyclone Idai for instance, caused the destruction of the only tertiary hospital in 4  
43  
44 429 affected provinces that serves an estimated 12 million people<sup>52</sup>. Targeting hospitals with  
45  
46 430 coverage numbers like these, to be strengthened for future disaster impacts and to support  
47  
48 431 them in providing continuity of care in the aftermath of future disasters can help reduce  
49  
50 432 health losses<sup>57</sup>.  
51  
52 433  
53 434 Due to the persisting health system disruption, humanitarian responders have identified the  
54  
55 435 need to deploy community health workers (CHWs) and mobile outreach services to cover  
56  
57 436 accessibility losses caused by the cyclones and to extend the reach of existing functional  
58  
59 437 services<sup>52,58</sup>. These study findings can assist policymakers in identifying and prioritizing  
60  
438 severely impacted districts and communities and regions where deployment of CHWs can  
439 make a difference. Supplementary material 3 to 6 present the most affected communities in

1  
2  
3 440 terms of increased travel time and coverage losses, directly post-cyclone. These analyses  
4  
5 441 can be routinely updated to assess the effect of health system recovery on accessibility.  
6  
7 442 The districts that were most affected by Cyclone Idai and Kenneth were historically, and are  
8  
9 443 in the future, also prone to disasters due to their topography (i.e. coastal cities, cyclone belt  
10  
11 444 Indian Ocean, and low elevation)<sup>52,55</sup>. Ideally, accessibility modelling could be applied to  
12  
13 445 simulate the effects of historical disasters on accessibility, as indicated in Supplement 5 and  
14  
15 446 Supplement 6, so targeted preventive measures can be taken for future disasters. Post-  
16  
17 447 disaster accessibility modelling can help identify weak spots in geographical accessibility to  
18  
19 448 the health system and helps to distinguish pre-existing accessibility gaps (Figure 3A and 4A)  
20  
21 449 from accessibility coverage losses as a result of disasters (Figure 3B and 4B). This  
22  
23 450 information is essential in health system recovery, strengthening and preparing for future  
24  
25 451 disasters.

25  
26 452  
27 453 Limitations and uncertainties of this study were primarily linked to the data. While the  
28  
29 454 occurrence of natural disasters generally accelerates data availability in affected countries,  
30  
31 455 there also are challenges of data quality, consistency, and format<sup>59</sup>. In this study, data from  
32  
33 456 various sources were combined to represent the post-cyclone situation as realistically as  
34  
35 457 possible, but since data gathering was ongoing, it was expected that some data were  
36  
37 458 incomplete or not fully processed at the time of usage. Health facility coordinates for  
38  
39 459 instance had duplicate occurrences in the database and health facility damages were solely  
40  
41 460 indicated by name, which resulted in manual spatial merging. Co-occurrences of rivers that  
42  
43 461 were indicated as floods were seen in the flood extent layer, minimally overestimating  
44  
45 462 actual flood extents in some parts of the affected regions. Besides post-disaster data  
46  
47 463 uncertainty, pre-disaster spatial data were also checked against background satellite  
48  
49 464 imagery. The hydrography of primary rivers stored in the data was found not to be fully  
50  
51 465 representative for actual hydrography in some regions. This could be a consequence of  
52  
53 466 digitizing against a less granular spatial resolution<sup>60</sup>. In some cases, passages and bridges  
54  
55 467 were detected on satellite background imagery where the OpenStreetMap road layer did  
56  
57 468 not present presence of roads. In places where hydrography is potentially overestimated  
58  
59 469 and not all roads are mapped, isolated land pockets are created in the merged land cover.  
60  
470 When modelling accessibility in these land pockets the population is assumed to be fully  
471 isolated from health care.

1  
2  
3 472

473 Next to data uncertainties, travel scenarios present a source of uncertainty as assumptions  
474 on travel speeds and modes are uniformly generalized across regions. In addition, we  
475 assumed that roads indicated as being restricted or closed, were considered only passable  
476 by foot if they were not inundated. However, some of the restricted roads were in fact  
477 passable by 4x4 vehicles. Other means of transport (e.g., bicycle, motorcycle) may also have  
478 been used in some places, which would increase accessibility to health centres. Since car  
479 ownership and access to motorized transport by the target population was expected to be  
480 very low, especially post-cyclone, it was decided to run the accessibility model for restricted  
481 and closed roads only by means of walking.

21 482

483 Our accessibility modelling assumes that patients always travel to the nearest health facility.  
484 However, literature has shown that patients sometimes bypass health facilities in search of  
485 higher quality care in Mozambique<sup>61,62</sup>. Previous research, has shown that 30.8% of  
486 pregnant women bypassed the nearest health facility in search of better prenatal care<sup>61</sup>.  
487 Our results can therefore present slight underestimations of actual travel times.

32 488

489 Despite some of the limitations, the results presented here provide important initial  
490 information for post-cyclone health system recovery which can be expanded through future  
491 research. Since post-disaster needs continuously change based on the nature of the event  
492 (e.g. receding flood waters, reconstruction efforts, and deployment of temporary medical  
493 services), following studies should also be focused on the ability to dynamically model  
494 accessibility based on these changes, so accessibility can be continuously monitored and  
495 humanitarian service delivery can be updated accordingly in disaster-affected districts.  
496 Additionally, it would be interesting to assess the effect of CHW deployment and mobile  
497 outreach communities on improved accessibility and accessibility coverage estimates, to  
498 quantify the effect of these interventions.

52 499

500 Post-disaster accessibility modelling can increase our understanding of spatial differences in  
501 health care needs in the direct aftermath of a disaster and can help target limited resources  
502 efficiently. Currently, there is no standardized approach in the humanitarian program cycle  
503 to assess post-disaster accessibility losses against baseline accessibility<sup>18</sup>. The lack of a

1  
2  
3 504 standardized methodology to spatially assess disaster impacts on accessibility can result in  
4  
5 505 uncoordinated decision making for temporary health facility locations, introducing  
6  
7 506 duplication probability, and complicates prioritization in recovery efforts. The results in this  
8  
9 507 paper not only reflect the importance of incorporating accessibility modelling in early  
10  
11 508 disaster response, but also provide a platform for discussing health system recovery,  
12  
13 509 mitigation and preparedness.  
14  
15  
16  
17  
18  
19  
20  
21  
22  
23  
24  
25  
26  
27  
28  
29  
30  
31  
32  
33  
34  
35  
36  
37  
38  
39  
40  
41  
42  
43  
44  
45  
46  
47  
48  
49  
50  
51  
52  
53  
54  
55  
56  
57  
58  
59  
60

For peer review only



1  
2  
3 510 **ACKNOWLEDGEMENTS**  
4

5  
6 511 We thank Michelle Schmitz and Peter Macharia for useful comments on an earlier version of  
7  
8 512 the manuscript.  
9

10 513  
11

12  
13 514 **DECLARATION OF COMPETING INTEREST**  
14

15 515 The authors declare that they have no known competing financial interests or personal  
16  
17 516 relationships that could have appeared to influence the work reported in this paper.  
18  
19

20 517  
21

22  
23 518 **FUNDING STATEMENT**  
24

25 519 This study was partly funded by UNICEF.  
26  
27

28 520  
29

30 521 **AUTHOR CONTRIBUTION**  
31

32 522 **Fleur Hierink**: conceptualization, methodology, formal analysis, writing, editing,  
33  
34 523 visualization, supervision. **Nelson Rodrigues**: data sharing, methodology, writing, editing,  
35  
36 524 validation. **Maria Muñiz**: writing, editing. **Rocco Panciera**: methodology, writing, editing.  
37  
38 525 **Nicolas Ray**: conceptualization, methodology, writing, editing, validation, supervision.  
39

40 526  
41

42  
43  
44 527 **DATA SHARING STATEMENT**  
45

46  
47 528 Data available upon request.  
48  
49  
50  
51  
52  
53  
54  
55  
56  
57  
58  
59  
60

## 529 REFERENCES

- 530 1. Delamater PL, Messina JP, Shortridge AM, et al. Measuring geographic access to health  
531 care: raster and network-based methods. *International journal of health geographics*  
532 2012;11(1):15.
- 533 2. Davis JR, Wilson S, Brock-Martin A, et al. The impact of disasters on populations with  
534 health and health care disparities. *Disaster medicine and public health preparedness*  
535 2010;4(1):30-38.
- 536 3. Abbas HB, Routray JK. A semi-quantitative risk assessment model of primary health care  
537 service interruption during flood: Case study of Aroma locality, Kassala State of  
538 Sudan. *International Journal of Disaster Risk Reduction* 2013;6:118-28.
- 539 4. Makanga PT, Schuurman N, Sacoor C, et al. Seasonal variation in geographical access to  
540 maternal health services in regions of southern Mozambique. *International journal*  
541 *of health geographics* 2017;16(1):1.
- 542 5. United Nations Office of Coordinated Humanitarian Affairs. Humanitarian Reponse Plan  
543 (2018-2019): revised following Cyclones Idai and Kenneth. May 2019.
- 544 6. Chen WH, Azman AS. Mitigating Cholera in the Aftermath of Cyclone Idai. *The American*  
545 *journal of tropical medicine and hygiene* 2019:tpmd190285.
- 546 7. World Health Organization. Relatório da Situação Nacional 11: 04 de Outubro de 2019,  
547 Período abrangido 9 a 22 de Setembro de 2019. 2019. [Available from]:  
548 [https://www.afro.who.int/sites/default/files/2019-](https://www.afro.who.int/sites/default/files/2019-10/National_SitRep%2011_MOZ_9%20a%2022%20de%20Setembro%202019_PORT.pdf)  
549 [10/National\\_SitRep%2011\\_MOZ\\_9%20a%2022%20de%20Setembro%202019\\_PORT.](https://www.afro.who.int/sites/default/files/2019-10/National_SitRep%2011_MOZ_9%20a%2022%20de%20Setembro%202019_PORT.pdf)  
550 [pdf](https://www.afro.who.int/sites/default/files/2019-10/National_SitRep%2011_MOZ_9%20a%2022%20de%20Setembro%202019_PORT.pdf)
- 551 8. Cambaza E, Mongo E, Anapakala E, et al. Outbreak of Cholera Due to Cyclone Kenneth in  
552 Northern Mozambique, 2019. *International journal of environmental research and*  
553 *public health* 2019;16(16):2925.
- 554 9. Willcock G. After Cyclones Idai and Kenneth, Recovery in Mozambique Continues:  
555 Reliefweb; 2019 [updated 17 May 2019. [Available from]:  
556 [https://reliefweb.int/report/mozambique/after-cyclones-idai-and-kenneth-recovery-](https://reliefweb.int/report/mozambique/after-cyclones-idai-and-kenneth-recovery-mozambique-continues)  
557 [mozambique-continues](https://reliefweb.int/report/mozambique/after-cyclones-idai-and-kenneth-recovery-mozambique-continues) accessed 16 Oct 2019.
- 558 10. UNICEF. Cyclone response mid-year sitrep #12: March-July 2019. 2019.
- 559 11. Devi S. Cyclone Idai: 1 month later, devastation persists. *The Lancet*  
560 2019;393(10181):1585.
- 561 12. Kahn R, Mahmud AS, Schroeder A, et al. Rapid Forecasting of Cholera Risk in  
562 Mozambique: Translational Challenges and Opportunities. *Prehospital and disaster*  
563 *medicine* 2019;34(5):557-62.
- 564 13. Santos E. Mozambique: The recovery from Cyclone Idai continues, but health needs  
565 remain [Report]. 3 May 2019 [[Available from]:  
566 [https://reliefweb.int/report/mozambique/mozambique-recovery-cyclone-idai-](https://reliefweb.int/report/mozambique/mozambique-recovery-cyclone-idai-continues-health-needs-remain)  
567 [continues-health-needs-remain](https://reliefweb.int/report/mozambique/mozambique-recovery-cyclone-idai-continues-health-needs-remain).
- 568 14. World Health Organization. Cyclone Idai - events as they happen 2019 [updated 18 June  
569 2019. [Available from]: [https://www.who.int/emergencies/cyclone-idai/events-as-](https://www.who.int/emergencies/cyclone-idai/events-as-they-happen)  
570 [they-happen](https://www.who.int/emergencies/cyclone-idai/events-as-they-happen) accessed 16 October 2019.
- 571 15. International Federation of the Red Cross. Mozambique: Tropical Cyclones Idai and  
572 Kenneth 2019.
- 573 16. Humanitarian Response. What is the Cluster Approach? [[Available from]:  
574 [https://www.humanitarianresponse.info/en/about-clusters/what-is-the-cluster-](https://www.humanitarianresponse.info/en/about-clusters/what-is-the-cluster-approach)  
575 [approach](https://www.humanitarianresponse.info/en/about-clusters/what-is-the-cluster-approach) accessed 10 Jul 2020.

- 1  
2  
3 576 17. Humanitarian Response. Humanitarian Programme Cycle [[Available from]:  
4 577 <https://www.humanitarianresponse.info/en/programme-cycle/space> accessed 10  
5 578 Jul 2020.
- 6  
7 579 18. World Health Organization. Post-Disaster Needs Assessments Guidelines. 2014.
- 8 580 19. Humanitarian Data Exchange. Mozambique 2019 [[Available from]:  
9 581 <https://data.humdata.org/event/idai> accessed 25 April 2019.
- 10 582 20. Muggy L, Stamm JLH. Dynamic, robust models to quantify the impact of decentralization  
11 583 in post-disaster health care facility location decisions. *Operations Research for*  
12 584 *Health Care* 2017;12:43-59.
- 13 585 21. Tapia AH, Maldonado E, Tchouakeu LMN, et al. Coordinating humanitarian information.  
14 586 *Information Technology & People* 2012
- 15 587 22. Thévenaz C, Resodihardjo SL. All the best laid plans... conditions impeding proper  
16 588 emergency response. *International Journal of Production Economics* 2010;126(1):7-  
17 589 21.
- 18 590 23. Ray N, Ebener S. AccessMod 3.0: computing geographic coverage and accessibility to  
19 591 health care services using anisotropic movement of patients. *International journal of*  
20 592 *health geographics* 2008;7(1):63.
- 21 593 24. Instituto Nacional de Estatística; United Nations Office for Coordination of Humanitarian  
22 594 Affairs Regional Office for Southern and Eastern Africa. Mozambique administrative  
23 595 level shapefiles. 2019. [Dataset]. [Available from]:  
24 596 <https://data.humdata.org/dataset/mozambique-administrative-levels-0-3>. Accessed:  
25 597 Jul 07, 2019
- 26 598 25. Global Disaster Alert and Coordination System. Overall Red alert Tropical Cyclone for  
27 599 IDAI-19. 2019. [Dataset]. [Available from]:  
28 600 [https://www.gdacs.org/resources.aspx?eventid=1000552&episodeid=24&eventtype](https://www.gdacs.org/resources.aspx?eventid=1000552&episodeid=24&eventtype=TC)  
29 601 [=TC](https://www.gdacs.org/resources.aspx?eventid=1000552&episodeid=24&eventtype=TC). Accessed: March 2020
- 30 602 26. Global Disaster Alert and Coordination System. Overall Red alert Tropical Cyclone for  
31 603 KENNETH-19. 2019. [Dataset]. [Available from]:  
32 604 <https://www.gdacs.org/report.aspx?eventtype=TC&eventid=1000559&episodeid=12>  
33 605 . Accessed: March 2020
- 34 606 27. Buchhorn M, Smets B, Bertels L, et al. Copernicus Global Land Service: Land Cover 100m,  
35 607 epoch "2015", Globe. 2019. Version V2.0.2. [Dataset]. [Available from]:  
36 608 <https://lcviewer.vito.be/download> doi: 10.5281/zenodo.3243509. Accessed: 31 Jul,  
37 609 2019
- 38 610 28. U.S. Geological Survey (USGS). Shuttle Radar Topography Mission 1 Arc-Second Global:  
39 611 SRTM1N22W016V3. 2000. [Dataset]. [Available from]:  
40 612 <https://search.earthdata.nasa.gov/search> doi:  
41 613 10.5067/MEASURES/NASADEM/NASADEM\_SIM.001. Accessed: 20 Sept, 2019
- 42 614 29. UN Operational Satellite Applications Programme (UNOSAT). UNOSAT Geospatial Data  
43 615 on Floods in Mozambique - March 2019. 2019. [Dataset]. [Available from]:  
44 616 [https://data.humdata.org/dataset/unosat-analysis-on-floods-in-mozambique-](https://data.humdata.org/dataset/unosat-analysis-on-floods-in-mozambique-march-2019)  
45 617 [march-2019](https://data.humdata.org/dataset/unosat-analysis-on-floods-in-mozambique-march-2019). Accessed: 31 Jul, 2019
- 46 618 30. Copernicus EMSR354. TC Kenneth Copernicus EMSR354 Flood Extent 20190502. 2019.  
47 619 [Dataset]. [Available from]:  
48 620 [https://geonode.ingc.gov.mz/layers/geonode:emsr354\\_observedeventmerged\\_2019](https://geonode.ingc.gov.mz/layers/geonode:emsr354_observedeventmerged_20190502)  
49 621 [0502](https://geonode.ingc.gov.mz/layers/geonode:emsr354_observedeventmerged_20190502). Accessed: 31Jul, 2019
- 50  
51  
52  
53  
54  
55  
56  
57  
58  
59  
60

- 1  
2  
3 622 31. OpenStreetMap. Osm Roads (Daily extract). 2018. [Dataset]. [Available from]:  
4 623 [https://geonode.ingc.gov.mz/layers/geonode:osm\\_roads](https://geonode.ingc.gov.mz/layers/geonode:osm_roads). Accessed: 07 Aug, 2019
- 5 624 32. World Food Program. Mozambique: Access Constraints as of 19 March 2019.  
6 625 [www.logcluster.org](http://www.logcluster.org), 2019. [Map]. [Available from]:  
7 626 [https://logcluster.org/sites/default/files/maps/moz\\_op\\_accessconstraints\\_a3p\\_201](https://logcluster.org/sites/default/files/maps/moz_op_accessconstraints_a3p_20190319.pdf)  
8 627 [90319.pdf](https://logcluster.org/sites/default/files/maps/moz_op_accessconstraints_a3p_20190319.pdf). Accessed: 23 Sept, 2019
- 9 628 33. World Food Program. Mozambique - Cabo Delgado - Access Constraints Map, 3 May  
10 629 2019. [www.logcluster.org](http://www.logcluster.org), 2019. [Map]. [Available from]:  
11 630 [https://logcluster.org/map/mozambique-cabo-delgado-access-constraints-map-3-](https://logcluster.org/map/mozambique-cabo-delgado-access-constraints-map-3-may-2019)  
12 631 [may-2019](https://logcluster.org/map/mozambique-cabo-delgado-access-constraints-map-3-may-2019). Accessed: 23 Sept, 2019
- 13 632 34. SIS-MA MMoH. Mozambique - Health facilities. 2019. [Dataset]. [Available from]:  
14 633 <https://data.humdata.org/dataset/mozambique-health-facilities>. Accessed: 17 Sept,  
15 634 2019
- 16 635 35. Facebook Connectivity Lab and Center for International Earth Science Information  
17 636 Network - CIESIN - Columbia University. High Resolution Settlement Layer (HRSL).  
18 637 <https://data.humdata.org/dataset/highresolutionpopulationdensitymaps-moz> 2019  
19 638 [accessed 6 August 2019].
- 20 639 36. QGIS geographic information system [program], 2019.
- 21 640 37. R: A Language and Environment for Statistical Computing [program]. 5 version. Vienna,  
22 641 Austria: R Foundation for Statistical Computing, 2018.
- 23 642 38. Jarvis A, Reuter H, Nelson A, et al. Hole-field seamless SRTM data, International Centre  
24 643 for Tropical Agriculture (CIAT). <http://srtmcsicg.iar.org> 2008
- 25 644 39. LOG-WFP. Mozambique: Access Constraints as of 19 March 2019, 2019. [Map].  
26 645 [Available from]: [https://logcluster.org/map/mozambique-access-constraints-map-](https://logcluster.org/map/mozambique-access-constraints-map-19-march-2019)  
27 646 [19-march-2019](https://logcluster.org/map/mozambique-access-constraints-map-19-march-2019)
- 28 647 40. LOG-WFP. Mozambique - Cabo Delgado: Access constraints map 3 May 2019, 2019.  
29 648 [Map]. [Available from]: [https://logcluster.org/map/mozambique-cabo-delgado-](https://logcluster.org/map/mozambique-cabo-delgado-access-constraints-map-3-may-2019)  
30 649 [access-constraints-map-3-may-2019](https://logcluster.org/map/mozambique-cabo-delgado-access-constraints-map-3-may-2019)
- 31 650 41. UNICEF. Strategy for health (2016–2030). *New York: United Nations Children's Fund* 2015
- 32 651 42. Golding N, Burstein R, Longbottom J, et al. Mapping under-5 and neonatal mortality in  
33 652 Africa, 2000–15: a baseline analysis for the Sustainable Development Goals. *The*  
34 653 *Lancet* 2017;390(10108):2171-82.
- 35 654 43. Thematic Research Network on Data and Statistics (TReNDS). Leaving no one of the map:  
36 655 A guide for gridded population data for sustainable development. 2020. [Available  
37 656 from]:  
38 657 [https://static1.squarespace.com/static/5b4f63e14eddec374f416232/t/5eb2b65ec57](https://static1.squarespace.com/static/5b4f63e14eddec374f416232/t/5eb2b65ec575060f0adb1feb/1588770424043/Leaving+no+one+off+the+map-4.pdf)  
39 658 [5060f0adb1feb/1588770424043/Leaving+no+one+off+the+map-4.pdf](https://static1.squarespace.com/static/5b4f63e14eddec374f416232/t/5eb2b65ec575060f0adb1feb/1588770424043/Leaving+no+one+off+the+map-4.pdf)
- 40 659 44. Tatem AJ. WorldPop, open data for spatial demography. *Scientific data* 2017;4(1):1-4.
- 41 660 45. dos Anjos Luis A, Cabral P. Geographic accessibility to primary healthcare centers in  
42 661 Mozambique. *International journal for equity in health* 2016;15(1):173.
- 43 662 46. World Health Organization. Health economics: GeoAccess 2019 [[Available from]:  
44 663 <https://www.who.int/choice/geoaccess/en/> accessed 15 March 2019.
- 45 664 47. Ebener S, Stenberg K, Brun M, et al. Proposing standardised geographical indicators of  
46 665 physical access to emergency obstetric and newborn care in low-income and middle-  
47 666 income countries. *BMJ global health* 2019;4(Suppl 5)

- 1  
2  
3 667 48. Munoz UH, Källestål C. Geographical accessibility and spatial coverage modeling of the  
4 668 primary health care network in the Western Province of Rwanda. *International*  
5 669 *journal of health geographics* 2012;11(1):40.  
6 670 49. Ouma PO, Maina J, Thurairara PN, et al. Access to emergency hospital care provided by  
7 671 the public sector in sub-Saharan Africa in 2015: a geocoded inventory and spatial  
8 672 analysis. *The Lancet Global Health* 2018;6(3):e342-e50.  
9 673 50. Schmitz MM, Serbanescu F, Arnott GE, et al. Referral transit time between sending and  
10 674 first-line receiving health facilities: a geographical analysis in Tanzania. *BMJ global*  
11 675 *health* 2019;4(Suppl 5):e001568.  
12 676 51. Alegana VA, Wright JA, Pentrina U, et al. Spatial modelling of healthcare utilisation for  
13 677 treatment of fever in Namibia. *International journal of health geographics*  
14 678 2012;11(1):6.  
15 679 52. Moitinho de Almeida M, Guha-Sapir D. Why Mozambique's cyclones tell us disaster  
16 680 preparedness needs health at its core: The BMJ opinion 2019 [[Available from]:  
17 681 [https://blogs.bmj.com/bmj/2019/05/10/mozambiques-cyclones-disaster-](https://blogs.bmj.com/bmj/2019/05/10/mozambiques-cyclones-disaster-preparedness-needs-health-core/?utm_source=twitter&utm_medium=hootsuite&utm_term=&utm_content=&utm_campaign=editors)  
18 682 [preparedness-needs-health-](https://blogs.bmj.com/bmj/2019/05/10/mozambiques-cyclones-disaster-preparedness-needs-health-core/?utm_source=twitter&utm_medium=hootsuite&utm_term=&utm_content=&utm_campaign=editors)  
19 683 [core/?utm\\_source=twitter&utm\\_medium=hootsuite&utm\\_term=&utm\\_content=&](https://blogs.bmj.com/bmj/2019/05/10/mozambiques-cyclones-disaster-preparedness-needs-health-core/?utm_source=twitter&utm_medium=hootsuite&utm_term=&utm_content=&utm_campaign=editors)  
20 684 [utm\\_campaign=editors](https://blogs.bmj.com/bmj/2019/05/10/mozambiques-cyclones-disaster-preparedness-needs-health-core/?utm_source=twitter&utm_medium=hootsuite&utm_term=&utm_content=&utm_campaign=editors) accessed 17 December 2019.  
21 685 53. Khan H, Vasilescu LG, Khan A. Disaster management cycle-a theoretical approach.  
22 686 *Journal of Management and Marketing* 2008;6(1):43-50.  
23 687 54. Liu A, Sullivan S, Khan M, et al. Community health workers in global health: scale and  
24 688 scalability. *Mount Sinai Journal of Medicine: A Journal of Translational and*  
25 689 *Personalized Medicine* 2011;78(3):419-35.  
26 690 55. World Health Organization. As post-cyclone resettlement, 200 000 people lack access to  
27 691 health services in Mozambique. Reliefweb, 2019.  
28 692 56. World Health Organization. Hospitals safe from disasters: Reduce risk, protect health  
29 693 facilities, save lives. 2007.  
30 694 57. World Health Organization. Natural disasters: protecting the public's health. Natural  
31 695 disasters: protecting the public's health2000.  
32 696 58. UNICEF. One year after Cyclone Idai, 2.5 million people in Mozambique remain in need  
33 697 of humanitarian assistance: UNICEF prepares for more frequent and ferocious  
34 698 disasters as a result of the climate crisis 2020 [[Available from]:  
35 699 [https://www.unicef.org/mozambique/en/press-releases/one-year-after-cyclone-](https://www.unicef.org/mozambique/en/press-releases/one-year-after-cyclone-idai-25-million-people-mozambique-remain-need-humanitarian)  
36 700 [idai-25-million-people-mozambique-remain-need-humanitarian](https://www.unicef.org/mozambique/en/press-releases/one-year-after-cyclone-idai-25-million-people-mozambique-remain-need-humanitarian) accessed 16 March  
37 701 2020.  
38 702 59. Altay N, Labonte M. Challenges in humanitarian information management and  
39 703 exchange: evidence from Haiti. *Disasters* 2014;38(s1):S50-S72.  
40 704 60. Nelson T, Wulder M, Niemann K. Spatial resolution implications of digitizing aerial  
41 705 photography for environmental applications. *The Imaging Science Journal*  
42 706 2001;49(4):223-32.  
43 707 61. Yao J, Agadjanian V. Bypassing health facilities in rural Mozambique: spatial,  
44 708 institutional, and individual determinants. *BMC health services research*  
45 709 2018;18(1):1006.  
46 710 62. Keyes EB, Parker C, Zissette S, et al. Geographic access to emergency obstetric services:  
47 711 a model incorporating patient bypassing using data from Mozambique. *BMJ Global*  
48 712 *Health* 2019;4(Suppl 5):e000772.  
49 713

1  
2  
3 714 **Figure legends:**  
4  
5 715

6 716 **Figure 1 - Cyclone affected districts, cyclone trajectory, and road damages.** (A) Idai affected  
7 717 districts. (B) Kenneth affected districts. (C) Idai cyclone trajectory\*. (D) Kenneth cyclone  
8 718 trajectory\*. (E) Road damages in Idai-affected districts. (F) Road damages in Kenneth-  
9 719 affected districts.

10  
11 720 \*Cyclone paths as reported on Global Disaster Alert and Coordination System (GDACS)<sup>25,26</sup>.  
12  
13 721

14 722 **Figure 2- Absolute and relative reduction in population coverage pre- and post-cyclone**

15 723 **Idai (A) and Kenneth (B).** Labels on top of bars indicate absolute reduction in population  
16 724 coverage of children under 5. Labels under districts indicate relative reduction in population  
17 725 coverage. Maximum limits of the bars indicate the absolute pre-cyclone coverage within 2  
18 726 hours travel time. Limits of the blue filled bar indicate the absolute post-cyclone coverage.  
19  
20 727 The x-axis is ordered according to relative reduction in population coverage.  
21  
22 728

23  
24 729 **Figure 3 – Accessibility modelling results for Idai districts.** Pre-cyclone travel time raster

25 730 (A). Post-cyclone travel time raster (B). Difference ratio raster between pre- and post-  
26 731 cyclone travel time (C). Uncertainty raster, as a result of the difference between -20% and  
27 732 +20% travel speed accessibility (D).  
28  
29 733

30 734 **Figure 4 – Accessibility modelling results Kenneth districts.** Pre-cyclone travel time raster

31 735 (A). Post-cyclone travel time raster (B). Difference ratio raster between pre- and post-  
32 736 cyclone travel time (C). Uncertainty raster, as a result of the difference between -20% and  
33 737 +20% travel speed accessibility (D).  
34  
35 738  
36  
37 739  
38  
39  
40  
41  
42  
43  
44  
45  
46  
47  
48  
49  
50  
51  
52  
53  
54  
55  
56  
57  
58  
59  
60

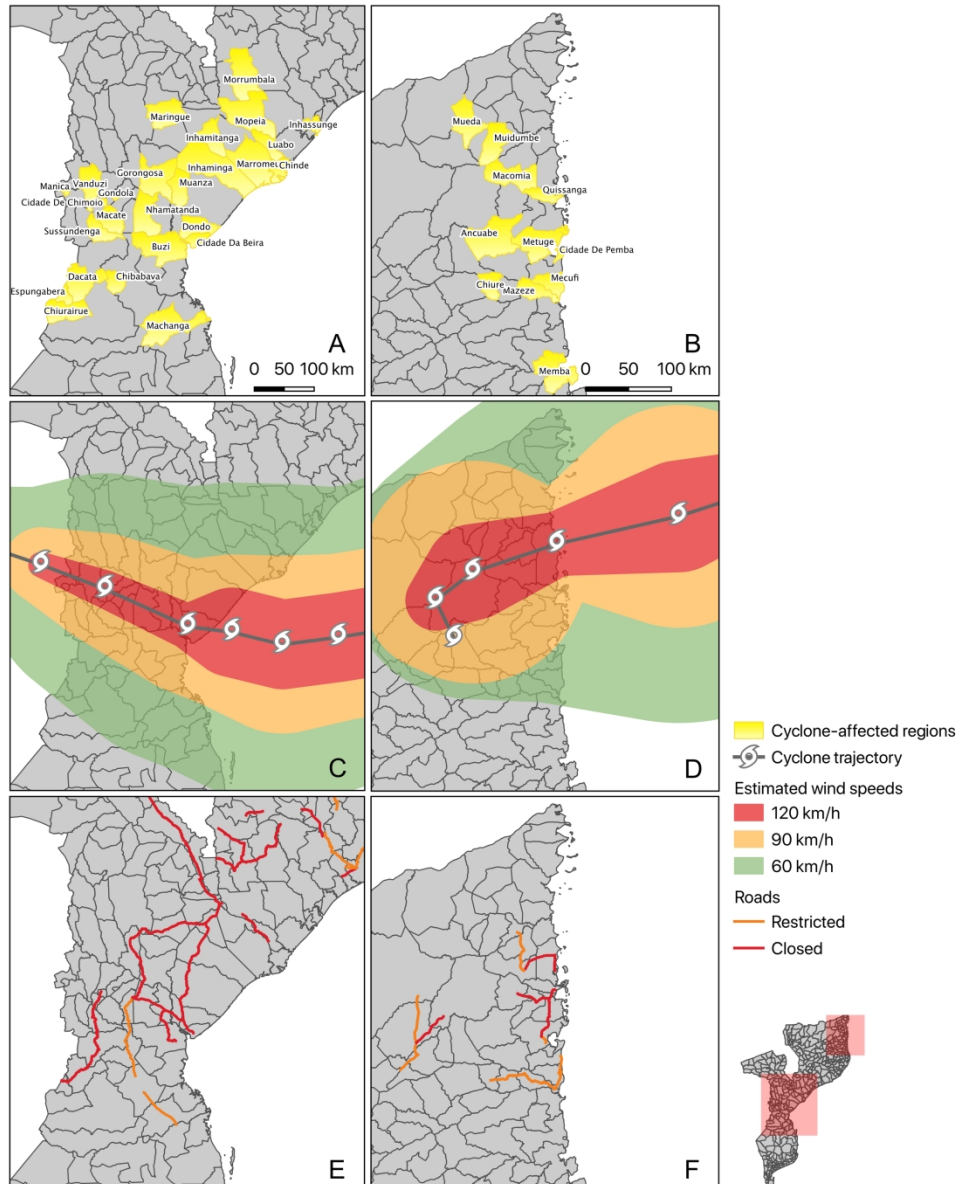

Figure 1 - Cyclone affected districts, cyclone trajectory, and road damages. (A) Idai affected districts. (B) Kenneth affected districts. (C) Idai cyclone trajectory\*. (D) Kenneth cyclone trajectory\*. (E) Road damages in Idai-affected districts. (F) Road damages in Kenneth-affected districts.

\*Cyclone paths as reported on Global Disaster Alert and Coordination System (GDACS) 25,26.

236x292mm (300 x 300 DPI)

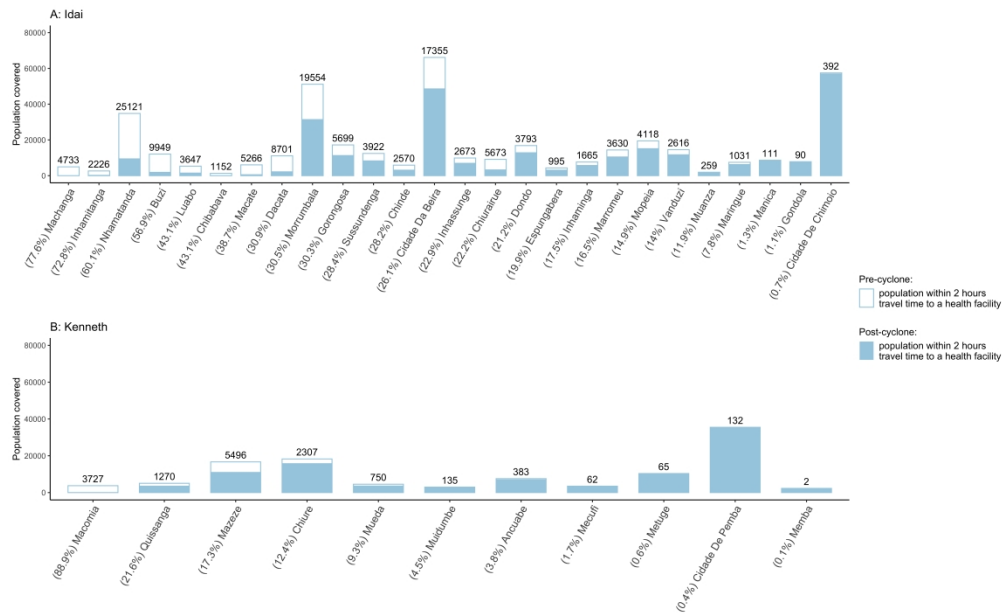

Figure 2- Absolute and relative reduction in population coverage pre- and post-cyclone Idai (A) and Kenneth (B). Labels on top of bars indicate absolute reduction in population coverage of children under 5. Labels under districts indicate relative reduction in population coverage. Maximum limits of the bars indicate the absolute pre-cyclone coverage within 2 hours travel time. Limits of the blue filled bar indicate the absolute post-cyclone coverage. The x-axis is ordered according to relative reduction in population coverage.

2777x1736mm (72 x 72 DPI)



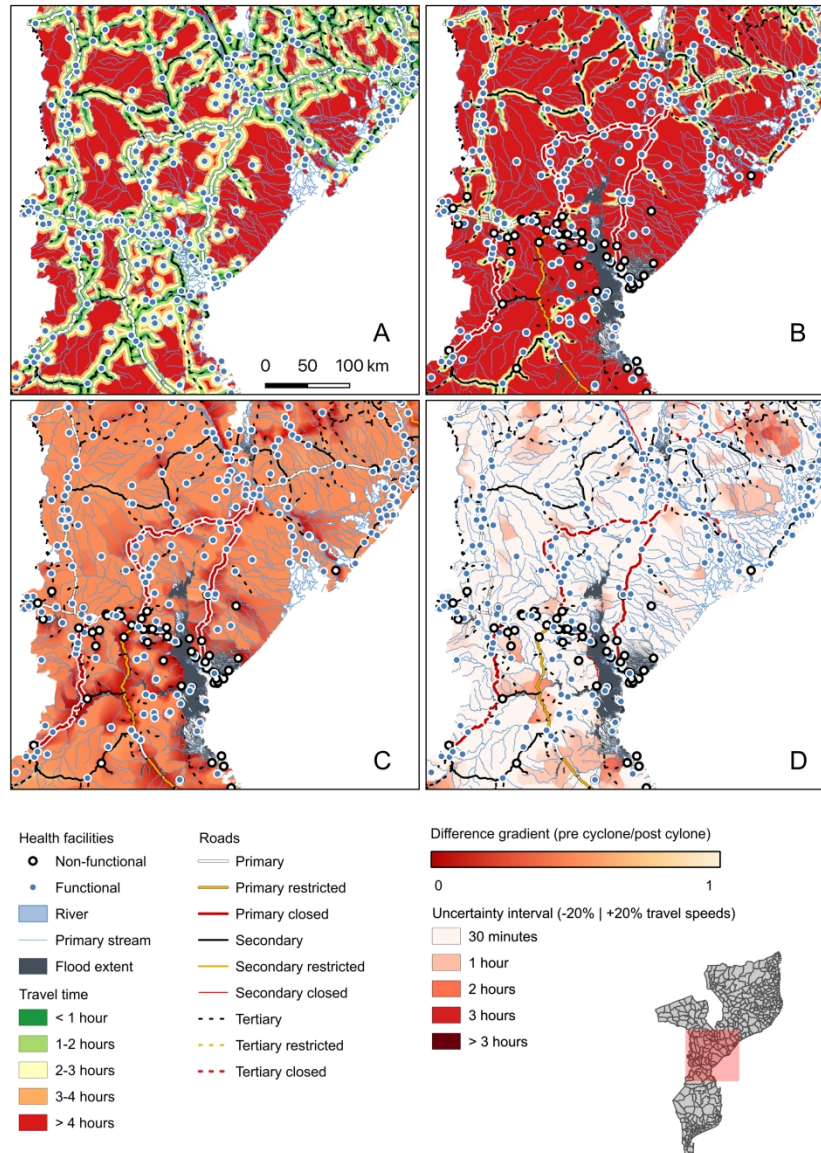

45 Figure 3 – Accessibility modelling results for Idai districts. Pre-cyclone travel time raster (A). Post-cyclone  
 46 travel time raster (B). Difference ratio raster between pre- and post-cyclone travel time (C). Uncertainty  
 47 raster, as a result of the difference between -20% and +20% travel speed accessibility (D).

48 209x296mm (300 x 300 DPI)

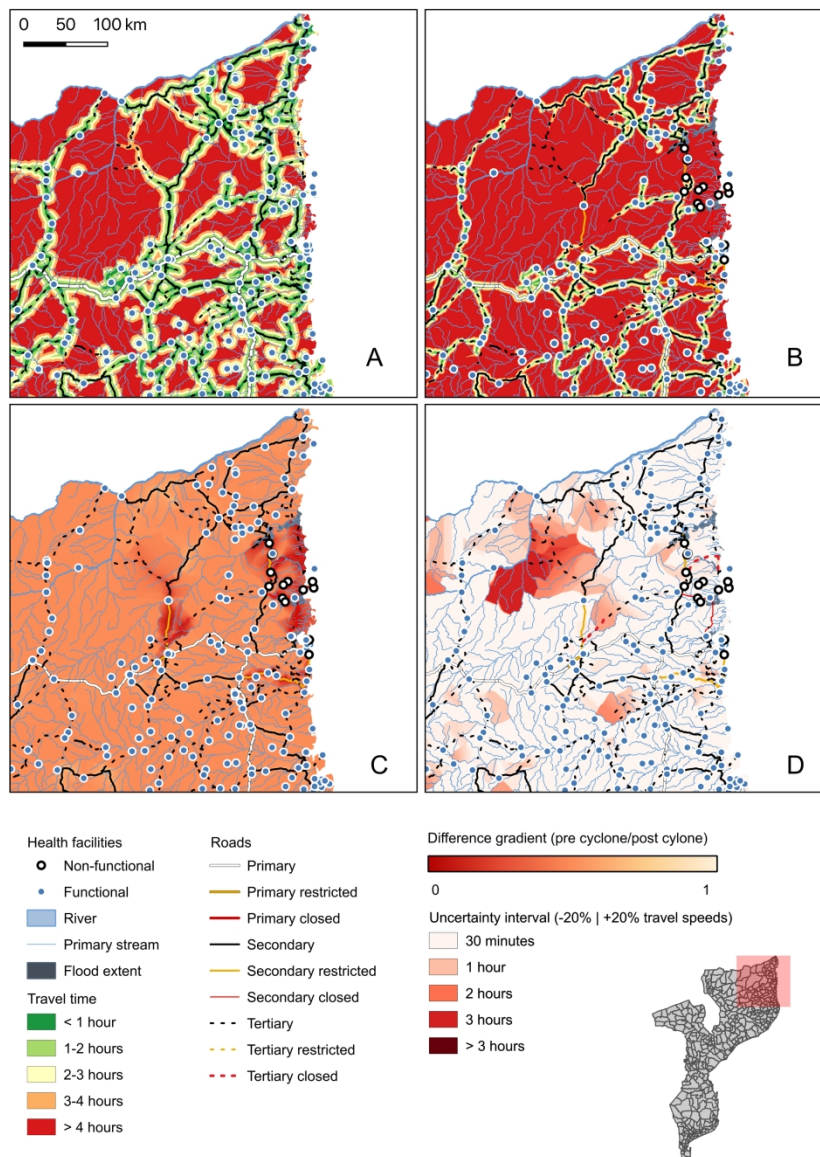

Figure 4 – Accessibility modelling results Kenneth districts. Pre-cyclone travel time raster (A). Post-cyclone travel time raster (B). Difference ratio raster between pre- and post-cyclone travel time (C). Uncertainty raster, as a result of the difference between -20% and +20% travel speed accessibility (D).

209x296mm (300 x 300 DPI)

## SUPPLEMENTARY MATERIAL

**Supplement 1-Data preparation for use in AccessMod**

All data preparation was carried out in Quantum Geographical Information System (QGIS) (version 3.4)<sup>24</sup> in limited combination with R (version 3.5.2)<sup>25</sup>. As indicated in Table 1, most data layers were retrieved from open data platforms. All raster- and shapefiles were saved in the projection system of Mozambique, i.e. UTM-37S [EPSG:32737]. All raster files were aligned using the digital elevation model (DEM) as reference. The data preparation process is fully described below for each data set.

*Elevation*

Anisotropic accessibility analyses, in other words analyses accounting for travel speeds on slopes, were carried out for this study. Elevation data were obtained from the Shuttle Radar Topography Mission (SRTM) in tiles at a resolution of 30 meters and mosaiced to cover the whole country<sup>38</sup>. Slopes were derived from it and accounted for when modelling walking movements.

*Land cover*

The land cover data set of the African continent<sup>27</sup> was clipped to the extent of Mozambique, leaving a small buffer around the country to prevent loss of data cells at the border. The data set was resampled at a resolution of 30 meters using nearest neighbor interpolation.

*Road network*

The pre-cyclone road network dataset was retrieved from Open Street Map (OSM) through the Geonode Platform of the National Institute for Disaster Management Mozambique (INGC), as this dataset was perceived to represent the most recent information on the roads and could be linked to the damaged roads, as indicated by the Logistics Cluster of the World Food Program (LOG-WFP). Road classes that were not indicated as official classification by OSM, were removed from the data<sup>48</sup>.

LOG-WFP provided the most up to date data on road network damages. However, the road constraint shapefile was updated frequently by overwriting previous versions, without

1  
2  
3 storing data historically. Therefore, historical post-cyclone status of roads and road  
4 segments was manually digitized from PDF maps provided by LOG-WFP<sup>28,29</sup>. The PDF maps  
5 were manually cross-referenced with the OSM road network layer, to include post-cyclone  
6 status, i.e. 1) open 2) restricted 3) closed.  
7  
8  
9

10  
11  
12 Roads were then reclassified based on the unique combination of road type and post-  
13 cyclone status, resulting in 34 unique road classes (e.g. primary road, primary road  
14 restricted, secondary road closed). All roads were given a specific travel speed, accounting  
15 for the different scenarios. In the pre-cyclone scenario for instance, all primary road classes  
16 (i.e. primary road, primary road restricted, primary road closed) had the same travel speed.  
17  
18 Whereas in the post cyclone scenario, the restricted and closed road types had a travel  
19 speed and travel mode accounted for their damages, as can be seen from Supplement 2.  
20  
21  
22  
23  
24  
25

### 26 27 *Barriers to movement*

28  
29 Rivers and lake shapefiles were obtained as lines and polygons from the National  
30 Directorate for Water Resource Management (DNGRH) and accuracy was checked using  
31 satellite imagery as a reference, using Microsoft Bing Imagery as a background through the  
32 QGIS QuickMapServices Plugin. Only primary rivers and lakes were taken for the analyses,  
33 under the assumption that smaller rivers and streams were passable by the population.  
34  
35 Water bodies were perceived as being impassable at all scales.  
36  
37  
38  
39  
40

41  
42 Flood extent caused by Cyclone Idai was taken from 19 March 2019 and flood extent for  
43 Cyclone Kenneth was taken from 2 May 2019, because extents were visually inspected and  
44 found to be largest on those dates and thus represent the biggest constraints for health care  
45 access. All flooded areas were treated as impassable at those dates, considering the depth  
46 and extent of the floods.  
47  
48  
49  
50

### 51 52 *Population data*

53  
54 High resolution population density estimates for children under five were downloaded at 30  
55 meter resolution from the Facebook Connectivity Lab and Center for International Earth  
56 Science Information network<sup>30</sup>. The raster was projected in Mozambique's projection  
57 system, UTM-37S [EPSG:32737], by using nearest neighbor interpolation. Loss of population  
58  
59  
60

1  
2  
3 caused by reprojection and clipping to country borders, was corrected for by smoothing the  
4 lost population equally over the raster cells. This was done by using a multiplication factor  
5 of the difference between the total sum of population before and after data processing  
6 using the raster calculator.  
7  
8  
9

### 10 11 12 *Health facilities*

13  
14 The geographic coordinates of all health facilities were obtained through the Humanitarian  
15 Data Exchange platform (HDX) and were originally sourced from the Ministry of Health in  
16 Mozambique (SIS-MA)<sup>34</sup>. The data was cleaned to exclude coordinates far outside of the  
17 country borders. Coordinates that fell just outside Mozambique were relocated within the  
18 country extents. Five health facilities were cross-referenced with other data sources (e.g.  
19 Neonatal Inventory Survey UNICEF, OpenStreetMap, Google Maps) because they were  
20 located on barriers, such as open sea, rivers or lakes.  
21  
22  
23  
24  
25  
26  
27  
28

29 Information on damaged health facilities was provided by the World Health Organization  
30 (WHO). This data did not include GPS coordinates, thus names of the damaged health  
31 facilities were cross referenced with the original health facility shapefile to include post-  
32 cyclone status of each facility, i.e. functional or non-functional. For damaged health facilities  
33 that were not included in the original health facility shapefile, coordinates were retrieved  
34 from a neonatal inventory performed by United Nations Children Fund (UNICEF) and also  
35 added as facility to the original health facility data, representing the pre-cyclone situation.  
36 Non-functional health facilities were filtered-out for geographical accessibility analyses  
37 reflecting the post-cyclone scenarios.  
38  
39  
40  
41  
42  
43  
44  
45  
46  
47

### 48 *Travel scenario*

49 Both our travel scenarios were developed in close collaboration with country  
50 representatives from UNICEF and were adapted to our target population, namely children  
51 under five accompanied by a parent (Supplement 2). Flood waters were assumed to be a full  
52 barrier to movement to the target population, thus health facilities located in flooded zones  
53 were completely inaccessible and flood waters were impassable.  
54  
55  
56  
57  
58  
59  
60

1  
2  
3  
4  
5  
6  
7  
8  
9  
10  
11  
12  
13  
14  
15  
16  
17  
18  
19  
20  
21  
22  
23  
24  
25  
26  
27  
28  
29  
30  
31  
32  
33  
34  
35  
36  
37  
38  
39  
40  
41  
42  
43  
44  
45  
46  
47  
48  
49  
50  
51  
52  
53  
54  
55  
56  
57  
58  
59  
60

## Supplement 2- Travel scenarios pre-cyclone and post-cyclone

| Label                              | Pre-cyclone         |             | Post-cyclone        |             |
|------------------------------------|---------------------|-------------|---------------------|-------------|
|                                    | Travel speed (km/h) | Travel mode | Travel speed (km/h) | Travel mode |
| Shrubs                             | 3                   | Walking     | 1.5                 | Walking     |
| Herbaceous Vegetation              | 3                   | Walking     | 1.5                 | Walking     |
| Cultivated and Managed Vegetation  | 3                   | Walking     | 1.5                 | Walking     |
| Agriculture Cropland               |                     |             |                     |             |
| Urban Built Up                     | 3                   | Walking     | 1.5                 | Walking     |
| Bare Sparse Vegetation             | 3                   | Walking     | 1.5                 | Walking     |
| Permanent Water Bodies             | 3                   | Walking     | 1.5                 | Walking     |
| Temporary Water Bodies             | 3                   | Walking     | 1.5                 | Walking     |
| Herbaceous Wetland                 | 3                   | Walking     | 1.5                 | Walking     |
| Closed Forest Evergreen Broad Leaf | 3                   | Walking     | 1.5                 | Walking     |
| Closed Forest Deciduous Broad Leaf | 3                   | Walking     | 1.5                 | Walking     |
| Open Forest Evergreen Broad Leaf   | 3                   | Walking     | 1.5                 | Walking     |
| Open Forest Deciduous Broad Leaf   | 3                   | Walking     | 1.5                 | Walking     |
| Open Sea                           | 3                   | Walking     | 1.5                 | Walking     |
| Trunk                              | 80                  | Motorized   | 50                  | Motorized   |
| Trunk Restricted                   | 80                  | Motorized   | 1.5                 | Walking     |
| Trunk Closed                       | 80                  | Motorized   | 1.5                 | Walking     |
| Primary                            | 80                  | Motorized   | 50                  | Motorized   |
| Primary Restricted                 | 80                  | Motorized   | 1.5                 | Walking     |
| Primary Closed                     | 80                  | Motorized   | 1.5                 | Walking     |
| Secondary                          | 50                  | Motorized   | 40                  | Motorized   |
| Secondary Restricted               | 50                  | Motorized   | 1.5                 | Walking     |
| Secondary Closed                   | 50                  | Motorized   | 1.5                 | Walking     |
| Tertiary                           | 30                  | Motorized   | 15                  | Motorized   |
| Tertiary Closed                    | 30                  | Motorized   | 1.5                 | Walking     |
| Tertiary Restricted                | 30                  | Motorized   | 1.5                 | Walking     |
| Road                               | 20                  | Motorized   | 10                  | Motorized   |
| Raceway                            | 3                   | Walking     | 3                   | Walking     |
| Residential                        | 20                  | Motorized   | 10                  | Motorized   |
| Residential Closed                 | 20                  | Motorized   | 1.5                 | Walking     |
| Living Street                      | 20                  | Motorized   | 10                  | Motorized   |
| Service                            | 3                   | Walking     | 1.5                 | Walking     |
| Track                              | 15                  | Motorized   | 10                  | Motorized   |
| Pedestrian                         | 3                   | Walking     | 1.5                 | Walking     |
| Pier                               | 3                   | Walking     | 1.5                 | Walking     |
| Path Closed                        | 3                   | Walking     | 1.5                 | Walking     |
| Path                               | 3                   | Walking     | 1.5                 | Walking     |
| Footway                            | 3                   | Walking     | 1.5                 | Walking     |
| Bridleway                          | 3                   | Walking     | 1.5                 | Walking     |
| Cycleway                           | 3                   | Walking     | 1.5                 | Walking     |
| Steps                              | 3                   | Walking     | 1.5                 | Walking     |
| Unclassified                       | 3                   | Walking     | 1.5                 | Walking     |

**Supplement 3- Relative population coverage pre- and post-cyclone Idai.** Ordered on relative difference. Difference indicated between parentheses. Error bars indicate the coverage uncertainty, considering -20% and +20% travel speeds.

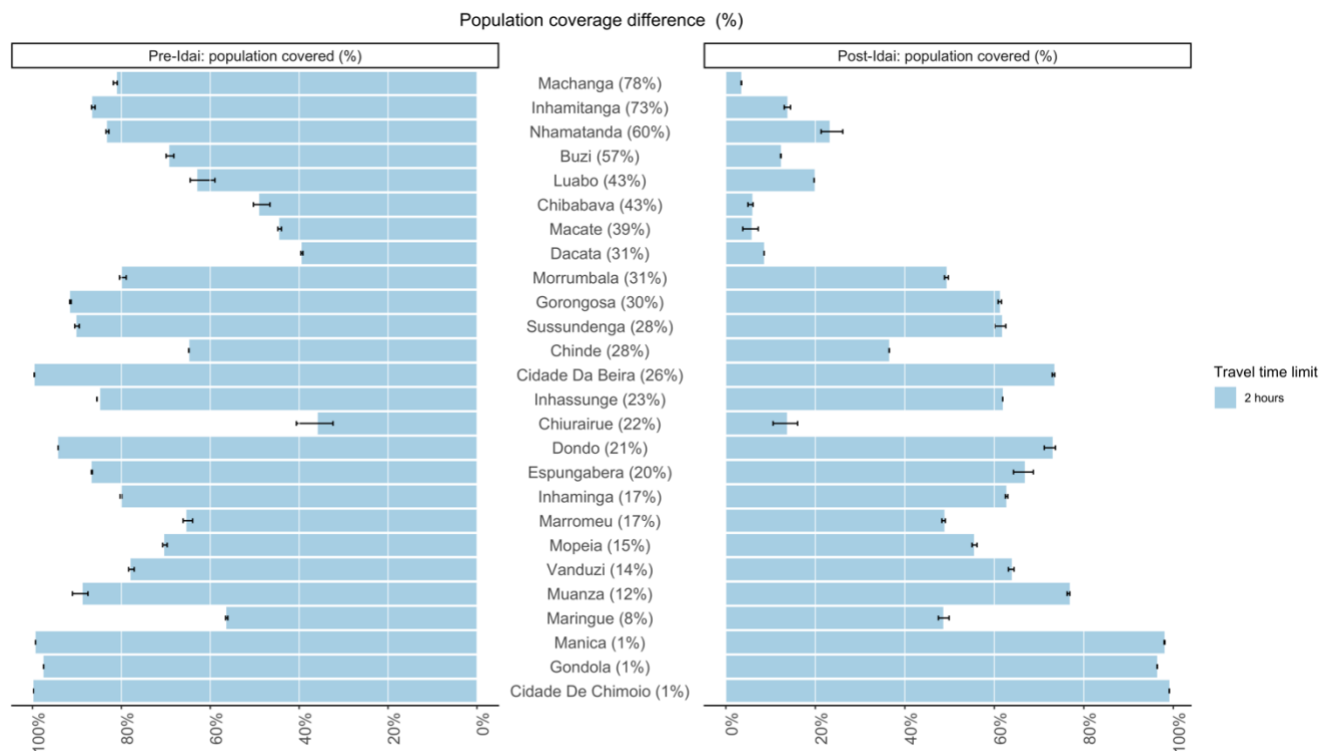

view only

**Supplement 4- Relative population coverage pre- and post-cyclone Kenneth.** Ordered on relative difference. Difference indicated between parentheses. Error bars indicate the coverage uncertainty, considering -20% and +20% travel speeds.

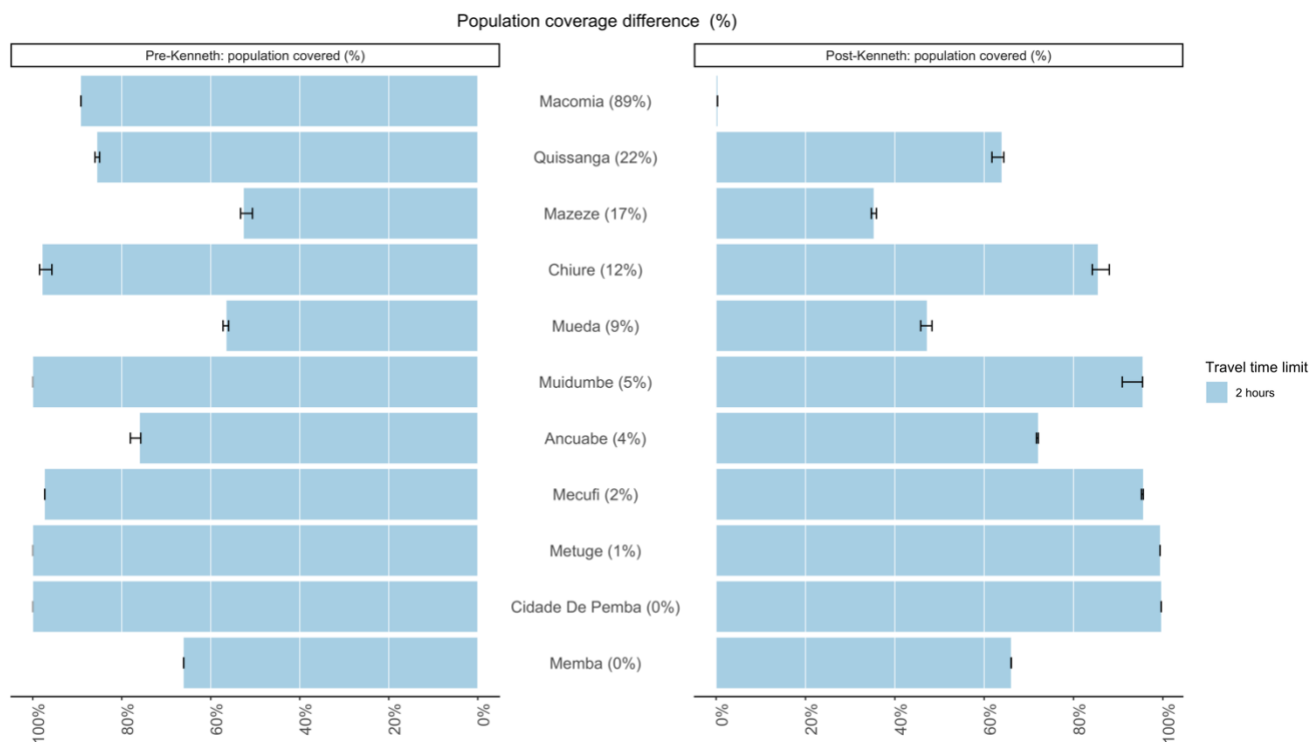

view only



**Supplement 5- Travel time per community in Idai affected districts. Fifty most affected communities by means of accessibility loss. Ordered on absolute travel time difference.**

| Community         | District  | Pre-cyclone travel time (h) | Post-cyclone travel time (h) | Difference pre- and post-cyclone (h) |
|-------------------|-----------|-----------------------------|------------------------------|--------------------------------------|
| Mucinemo          | Buzi      | 1.3                         | 63.6                         | 62.3                                 |
| Bupira            | Buzi      | 1.1                         | 62.3                         | 61.3                                 |
| Massuinda         | Buzi      | 1.2                         | 60.1                         | 58.9                                 |
| Njanga            | Buzi      | 4.3                         | 59.1                         | 54.7                                 |
| Guenje-Sede       | Buzi      | 2.9                         | 57.3                         | 54.4                                 |
| Mbereaizique      | Buzi      | 2.9                         | 57.3                         | 54.4                                 |
| Shinizia Chinhale | Muanza    | 24.0                        | 77.8                         | 53.8                                 |
| Chipota           | Muanza    | 24.4                        | 78.0                         | 53.6                                 |
| Wiriquizi         | Muanza    | 22.2                        | 74.1                         | 51.9                                 |
| Chingamuzi        | Muanza    | 22.7                        | 74.5                         | 51.8                                 |
| Mussacazwidje     | Buzi      | 3.5                         | 55.3                         | 51.8                                 |
| Mussacazwidje     | Buzi      | 3.5                         | 55.3                         | 51.8                                 |
| Magua             | Buzi      | 4.8                         | 56.6                         | 51.8                                 |
| Nkolone Praia     | Muanza    | 20.7                        | 72.3                         | 51.7                                 |
| Mukulumba 1       | Muanza    | 20.4                        | 71.8                         | 51.4                                 |
| Mukulumba cidade  | Muanza    | 20.2                        | 71.4                         | 51.2                                 |
| Nhanganga         | Muanza    | 19.9                        | 70.8                         | 50.9                                 |
| Mutanda           | Buzi      | 5.4                         | 55.3                         | 49.9                                 |
| Macova-Mutanda    | Buzi      | 6.3                         | 55.1                         | 48.9                                 |
| Puanda            | Buzi      | 2.9                         | 51.6                         | 48.7                                 |
| Luanda 1          | Muanza    | 18.8                        | 67.4                         | 48.6                                 |
| Nhamacalango      | Muanza    | 17.4                        | 65.8                         | 48.4                                 |
| Sengo             | Dondo     | 5.3                         | 53.5                         | 48.2                                 |
| Luanda 2          | Muanza    | 18.0                        | 65.8                         | 47.8                                 |
| Praia Nova        | Dondo     | 3.9                         | 51.5                         | 47.6                                 |
| Praia Farol       | Dondo     | 3.8                         | 51.4                         | 47.6                                 |
| Bingue Sede       | Muanza    | 16.4                        | 63.8                         | 47.4                                 |
| Nkonde 2          | Muanza    | 16.4                        | 63.8                         | 47.4                                 |
| Massitche         | Dondo     | 7.1                         | 54.5                         | 47.4                                 |
| Goonda Majaca     | Chibabava | 6.5                         | 53.3                         | 46.8                                 |
| Ngomole           | Muanza    | 10.1                        | 56.7                         | 46.6                                 |
| Ngalazi           | Dondo     | 6.0                         | 52.3                         | 46.3                                 |
| Nhacudjica        | Buzi      | 6.3                         | 52.4                         | 46.1                                 |
| Chitundo          | Dondo     | 2.0                         | 47.7                         | 45.7                                 |
| Macarate          | Chibabava | 5.3                         | 51.0                         | 45.7                                 |
| Nhamissassa       | Muanza    | 15.9                        | 61.5                         | 45.6                                 |
| Docue             | Buzi      | 5.7                         | 51.3                         | 45.6                                 |
| Khome 1           | Dondo     | 1.4                         | 46.8                         | 45.4                                 |
| Nherere 2         | Muanza    | 14.0                        | 59.0                         | 45.0                                 |
| Parange           | Buzi      | 3.6                         | 48.6                         | 45.0                                 |
| Njocho            | Buzi      | 5.9                         | 50.9                         | 45.0                                 |
| Binda             | Machanga  | 0.7                         | 45.2                         | 44.6                                 |
| Khome 2           | Dondo     | 0.6                         | 45.2                         | 44.6                                 |
| Veruca            | Chibabava | 4.1                         | 48.6                         | 44.5                                 |
| Mamunge           | Buzi      | 5.1                         | 49.2                         | 44.1                                 |
| Birirane          | Muanza    | 13.1                        | 57.2                         | 44.1                                 |
| Vala-vala         | Buzi      | 5.2                         | 49.2                         | 44.1                                 |
| Muche             | Gorongosa | 1.5                         | 45.5                         | 44.0                                 |
| Machiquire        | Buzi      | 2.6                         | 46.1                         | 43.5                                 |
| Nhazwicasse       | Gorongosa | 1.0                         | 44.5                         | 43.5                                 |

**Supplement 6- Travel time per community in Idai affected districts. Point locations of communities in Idai affected districts.**

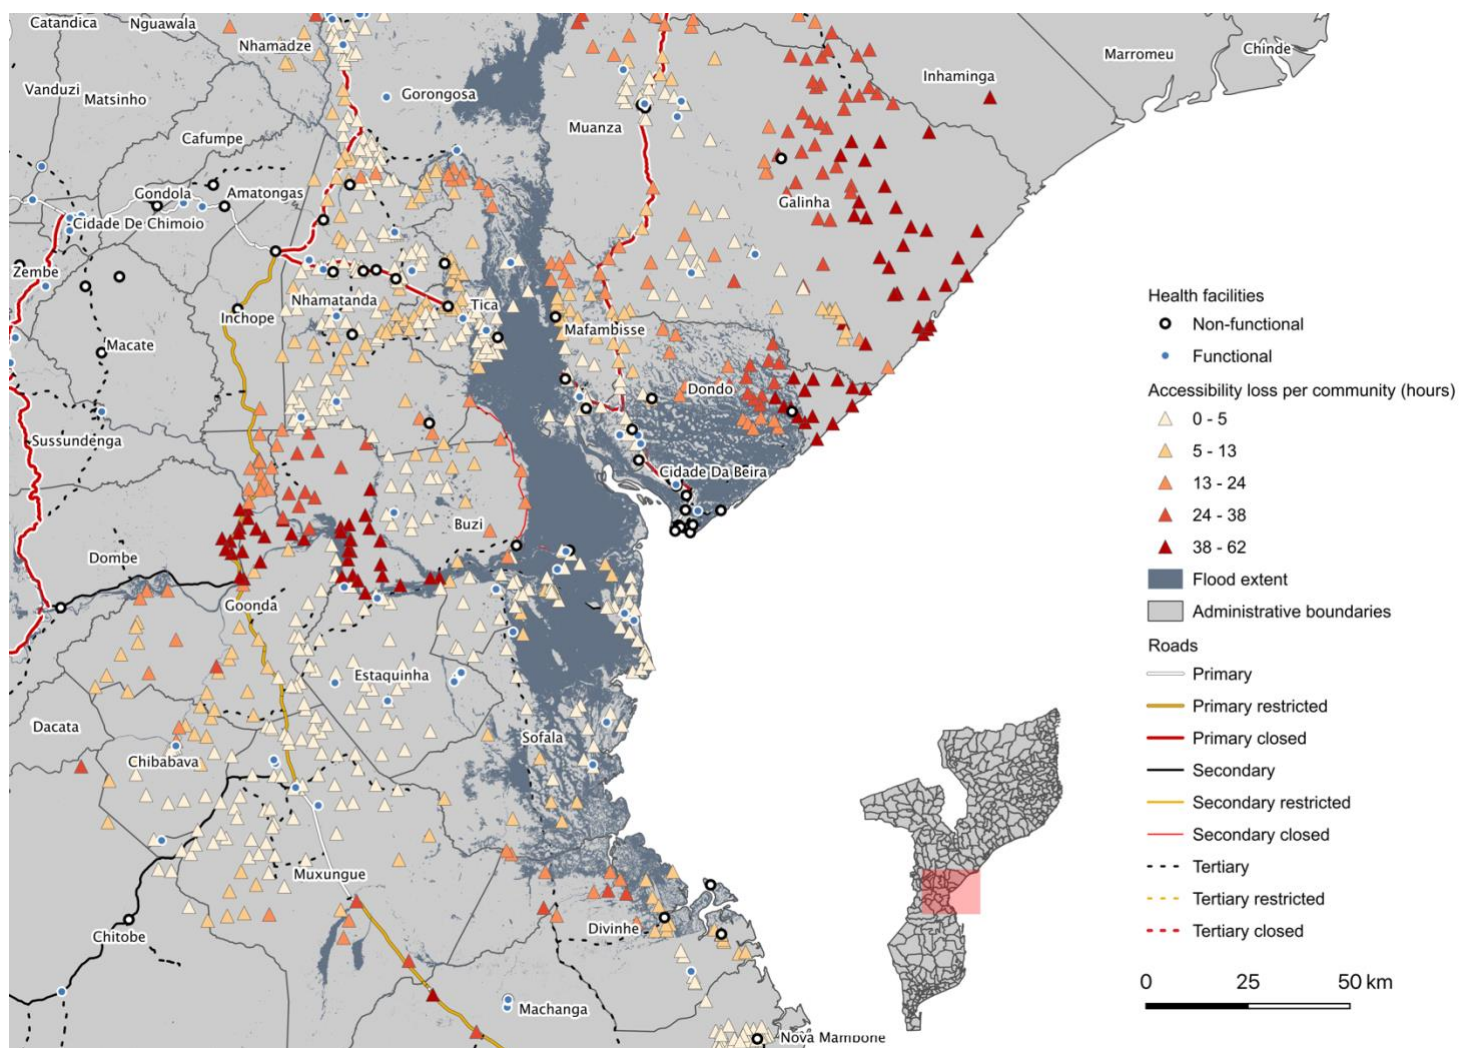

# BMJ Open

## Modelling geographical accessibility to support disaster response and rehabilitation of a health care system: An impact analysis of Cyclones Idai and Kenneth in Mozambique

|                                 |                                                                                                                                                                                                                                                                                                                                                                                                                                                                  |
|---------------------------------|------------------------------------------------------------------------------------------------------------------------------------------------------------------------------------------------------------------------------------------------------------------------------------------------------------------------------------------------------------------------------------------------------------------------------------------------------------------|
| Journal:                        | <i>BMJ Open</i>                                                                                                                                                                                                                                                                                                                                                                                                                                                  |
| Manuscript ID                   | bmjopen-2020-039138.R2                                                                                                                                                                                                                                                                                                                                                                                                                                           |
| Article Type:                   | Original research                                                                                                                                                                                                                                                                                                                                                                                                                                                |
| Date Submitted by the Author:   | 08-Sep-2020                                                                                                                                                                                                                                                                                                                                                                                                                                                      |
| Complete List of Authors:       | Hierink, Fleur; University of Geneva, Institute of Global Health; University of Geneva, Institute for Environmental Sciences<br>Rodrigues, Nelson; UNICEF Mozambique<br>Muñiz, Maria; United Nations Childrens Fund, Eastern and Southern Africa Regional Office<br>Panciera, Rocco; United Nations Childrens Fund, Health Section<br>Ray, Nicolas; University of Geneva, Institute of Global Health; University of Geneva, Institute for Environmental Sciences |
| <b>Primary Subject Heading</b>: | Health services research                                                                                                                                                                                                                                                                                                                                                                                                                                         |
| Secondary Subject Heading:      | Global health                                                                                                                                                                                                                                                                                                                                                                                                                                                    |
| Keywords:                       | International health services < HEALTH SERVICES ADMINISTRATION & MANAGEMENT, Organisation of health services < HEALTH SERVICES ADMINISTRATION & MANAGEMENT, Geographical mapping < TROPICAL MEDICINE, Risk management < HEALTH SERVICES ADMINISTRATION & MANAGEMENT                                                                                                                                                                                              |
|                                 |                                                                                                                                                                                                                                                                                                                                                                                                                                                                  |

SCHOLARONE™  
Manuscripts



I, the Submitting Author has the right to grant and does grant on behalf of all authors of the Work (as defined in the below author licence), an exclusive licence and/or a non-exclusive licence for contributions from authors who are: i) UK Crown employees; ii) where BMJ has agreed a CC-BY licence shall apply, and/or iii) in accordance with the terms applicable for US Federal Government officers or employees acting as part of their official duties; on a worldwide, perpetual, irrevocable, royalty-free basis to BMJ Publishing Group Ltd ("BMJ") its licensees and where the relevant Journal is co-owned by BMJ to the co-owners of the Journal, to publish the Work in this journal and any other BMJ products and to exploit all rights, as set out in our [licence](#).

The Submitting Author accepts and understands that any supply made under these terms is made by BMJ to the Submitting Author unless you are acting as an employee on behalf of your employer or a postgraduate student of an affiliated institution which is paying any applicable article publishing charge ("APC") for Open Access articles. Where the Submitting Author wishes to make the Work available on an Open Access basis (and intends to pay the relevant APC), the terms of reuse of such Open Access shall be governed by a Creative Commons licence – details of these licences and which [Creative Commons](#) licence will apply to this Work are set out in our licence referred to above.

Other than as permitted in any relevant BMJ Author's Self Archiving Policies, I confirm this Work has not been accepted for publication elsewhere, is not being considered for publication elsewhere and does not duplicate material already published. I confirm all authors consent to publication of this Work and authorise the granting of this licence.

1  
2  
3  
4  
5  
6  
7  
8  
9  
10  
11  
12  
13  
14  
15  
16  
17  
18  
19  
20  
21  
22  
23  
24  
25  
26  
27  
28  
29  
30  
31  
32  
33  
34  
35  
36  
37  
38  
39  
40  
41  
42  
43  
44  
45  
46  
47  
48  
49  
50  
51  
52  
53  
54  
55  
56  
57  
58  
59  
60

## Modelling geographical accessibility to support disaster response and rehabilitation of a health care system:

### *An impact analysis of Cyclones Idai and Kenneth in Mozambique*

Fleur Hierink<sup>1,2</sup>, Nelson Rodrigues<sup>3</sup>, Maria Muñiz<sup>4</sup>, Rocco Panciera<sup>5</sup>, Nicolas Ray<sup>1,2</sup>

1. Institute of Global Health, Faculty of Medicine, University of Geneva, Geneva, Switzerland

2. Institute for Environmental Sciences, University of Geneva, Geneva, Switzerland

3. The United Nations Children's Fund, Mozambique, Maputo, Mozambique

4. The United Nations Children's Fund, Eastern and Southern Africa Regional Office, Nairobi, Kenya

5. The United Nations Children's Fund, Health Section, New York, United States of America

#### **CORRESPONDENCE:**

Fleur Hierink

[fleur.hierink@unige.ch](mailto:fleur.hierink@unige.ch)

GeoHealth group

Institute for Environmental Sciences

Office B401, UNI CARLVOGT

66 Bd Carl Vogt, 1205 Geneva

Switzerland

#### **KEYWORDS:**

International health services, organization of health services, geographical mapping, risk management

## 1 **ABSTRACT**

### 2 **Objectives**

3 Modelling and assessing the loss of geographical accessibility is key to support disaster  
4 response and rehabilitation of the health care system. The aim of this study was therefore  
5 to estimate post-disaster travel times to functional health facilities and analyze losses in  
6 accessibility coverage after Cyclones Idai and Kenneth in Mozambique in 2019.

### 7 **Setting**

8 We modeled travel time of vulnerable population to the nearest functional health facility in  
9 two cyclone-affected regions in Mozambique. Modelling was done using AccessMod version  
10 5.6.30, where roads, rivers, lakes, flood extent, topography, and land cover datasets were  
11 overlaid with health facility coordinates and high-resolution population data to obtain  
12 accessibility coverage estimates under different travel scenarios.

### 13 **Outcome measures**

14 Travel time to functional health facilities and accessibility coverage estimates were used to  
15 identify spatial differences between pre-disaster and post-disaster geographical  
16 accessibility.

### 17 **Results**

18 We found that accessibility coverage decreased in the flood affected districts, as a result of  
19 reduced travel speeds, road constraints and non-functional health facilities. In Idai-affected  
20 districts, accessibility coverage decreased from 78.8% to 52.5%, implying that 136,941  
21 children under 5 were no longer able to reach the nearest facility within 2 hours travel time.  
22 In Kenneth-affected districts, accessibility coverage decreased from 82.2% to 71.5%,  
23 corresponding to 14,330 children under 5 having to travel more than 2 hours to reach the  
24 nearest facility. Damage to transport networks and reduced travel speeds resulted in the  
25 most substantial accessibility coverage losses in both Idai and Kenneth-affected districts.

## 29 **Conclusions**

30 Post-disaster accessibility modelling can increase our understanding of spatial differences in  
31 geographic access to care in the direct aftermath of a disaster and can inform targeting and  
32 prioritization of limited resources. Our results reflect opportunities for integrating  
33 accessibility modelling in early disaster response, and to inform discussions on health  
34 system recovery, mitigation and preparedness.

## 36 **STRENGTHS AND LIMITATIONS OF THIS STUDY**

- 38 • This is the first study presenting the applicability of post-disaster geographical  
39 accessibility modelling.
- 40 • The approach enables quantification of disaster impacts on geographical health care  
41 accessibility to prioritize post-disaster interventions and to build resilience for future  
42 disasters.
- 43 • To account for uncertainty of the assumed travel speeds, we considered -20% and  
44 +20% intervals on motorized travel speeds.
- 45 • Data from various sources and administrative levels were combined to represent the  
46 post-cyclone situation as realistically as possible, but since data gathering was  
47 ongoing, it was expected that some data were incomplete or not fully processed at  
48 the time of usage.
- 49 • Our accessibility modelling assumes that patients always travel to the nearest health  
50 facility. However, literature has shown that patients sometimes bypass health  
51 facilities in search of higher-quality care in Mozambique.

## 1. INTRODUCTION

Geographical proximity to health facilities is a crucial aspect of accessibility, utilization and the provision of health services to populations in need<sup>1</sup>. Road networks and natural barriers (such as rivers, water bodies, and flooded areas) are important factors that determine the geographical (i.e. physical) accessibility of a population to the network of functional health facilities. During natural disasters, roads and health facilities are often damaged, yet health care demand rises substantially at the same time due to injuries and increased communicable disease risks<sup>2,3</sup>. The interplay between the disruption of health infrastructure, transport network, and the rise in health care demand, is known to disable a large portion of the population's access to care they need in the aftermath of a disaster<sup>3,4</sup>. This is especially the case in already medically underserved regions, where the event can lead to new health disparities or exacerbate existing ones<sup>2</sup>.

In March and April 2019, two cyclones made landfall in Mozambique. This was the first time in history that two strong cyclones hit Mozambique consecutively in the same season<sup>5</sup>. On 14 March 2019, Tropical Cyclone Idai made landfall in Beira. Followed by a week of heavy rains and winds the storm ended on 21 March 2019<sup>6</sup>. In the middle of the humanitarian emergency response for Cyclone Idai, a second cyclone hit Northern Mozambique. Cyclone Kenneth, a category 4 cyclone and the strongest recorded cyclone on the African continent, made landfall in Pemba, Cabo Delgado on 25 April 2019<sup>7,8</sup>. The two cyclones combined had a death toll of 648, with 603 fatalities due to Idai and 45 deaths caused by Kenneth, and left over 2.2 million people in need of humanitarian assistance<sup>5</sup>. The cyclone's destruction isolated entire communities for weeks due to flood waters, destroyed telecommunication networks, and extensive road damage<sup>9,10</sup>. In addition, stagnant waters, inability in accessing safe water and sanitation, and overcrowding in temporary accommodation led to a cholera outbreak and a significant increase in malaria cases<sup>5,8,11,12</sup>. Major damage to 113 health facilities were reported after both cyclones, causing severe disruption in health service provision and restricting the population's access to adequate health care<sup>13,14</sup>. Although many humanitarian actors have estimated substantial losses in health care accessibility and availability<sup>5,9,10,13,15</sup>, the quantitative impact of Cyclone Idai and Kenneth on geographical accessibility to health care remains unknown. Modelling geographical accessibility and population coverage by means of travel time to health facilities, can give important insights



1  
2  
3 84 for targeting humanitarian action and preparing for future disasters in a coordinated  
4  
5 85 manner<sup>16</sup>.  
6  
7 86

8  
9 87 Currently, quantitative post-disaster accessibility assessments are not a part of standardized  
10  
11 88 response guidelines, preventing coordinated and centralized decision making on temporary  
12  
13 89 facility location to serve beneficiaries in the most optimal way<sup>16</sup>. Guidelines for a post-  
14  
15 90 disaster needs assessment from the World Health Organization (WHO)<sup>17</sup>, advise on a  
16  
17 91 comparison between baseline and post-disaster accessibility through the evaluation of key  
18  
19 92 indicators. However, the suggested key indicators reflect rather static measures of  
20  
21 93 accessibility, such as hospital beds per 10,000 population or number of damaged health  
22  
23 94 facilities<sup>17</sup>.  
24  
25 95

26  
27 96 Yet, international efforts to support humanitarian responses on the ground accelerate post-  
28  
29 97 disaster data gathering, enabling a more realistic quantification of accessibility to health  
30  
31 98 care by means of health facility damages, loss of road access, and barriers to movement  
32  
33 99 such as flood waters<sup>18</sup>. Guidance on assessing loss in geographical accessibility while  
34  
35 100 considering spatial barriers remains abstract or even lacking in disaster management  
36  
37 101 frameworks. Meanwhile, geographical accessibility models hold actionable information and  
38  
39 102 have the potential to quantify gaps and overlaps in (temporary) service provisioning,  
40  
41 103 enabling coordinated, targeted and centralized decision making for humanitarian action<sup>16</sup>,  
42  
43 104 enhancing both financial and operational efficiency<sup>19,20</sup>.  
44  
45 105

46  
47 106 This study therefore presents a data processing and spatial accessibility modelling method  
48  
49 107 to assess post-disaster accessibility to health facilities and analyze accessibility coverage  
50  
51 108 losses as a result of cyclones Idai and Kenneth in Mozambique. The approach enables  
52  
53 109 quantification of disaster impacts on geographical health care accessibility to prioritize post-  
54  
55 110 disaster interventions and to build resilience for future disasters. This is the first study  
56  
57 111 presenting the applicability of post-disaster geographical accessibility modelling.  
58  
59  
60

## 112 2. METHODS

### 113 2.1 Overall methodology

114 In this study, *accessibility* is measured as the travel time to health facilities and *accessibility*  
 115 *coverage* (i.e. coverage) is defined as the estimated number or percentage of people  
 116 covered or located within a travel time catchment area<sup>21</sup>. To model accessibility to health  
 117 facilities, we consider topography, road networks, constraints to movement (e.g. rivers,  
 118 lakes and flood extent), target population distribution, and the locations of functional health  
 119 facilities. We accessed and prepared multiple data layers (Table 1) assembled in the  
 120 aftermath of Cyclones Idai and Kenneth, between April-September 2019. A total of three  
 121 scenarios were prepared, representing 1) pre-Idai and pre-Kenneth (before March 2019), 2)  
 122 post-Idai (up to one-week post-cyclone), and 3) post-Kenneth (up to one-week post-cyclone)  
 123 situations. We modeled population travel time to the nearest health facility and accessibility  
 124 coverage, for two cyclone-affected regions.

125

126 **Table 1** – Overview of data layers and data sources

| Layer name                        | Source <sup>a</sup>                                              | Source date <sup>b</sup>                                        | Download date | Type     | Original resolution |
|-----------------------------------|------------------------------------------------------------------|-----------------------------------------------------------------|---------------|----------|---------------------|
| Administrative boundaries         | <a href="#">INE &amp; UN-OCHA ROSEA (HDX)</a> <sup>22</sup>      | 02.04.19                                                        | 31.07.19      | Polygon  | -                   |
| Cyclone trajectory (Idai/Kenneth) | GDACS <sup>23,24</sup>                                           | <a href="#">15.03.19/25.04.19</a>                               | 08.03.2020    | Polygon  | -                   |
| Land cover                        | <a href="#">Copernicus</a> <sup>25</sup>                         | 15.11.18                                                        | 31.07.19      | Raster   | 100 meters          |
| Elevation                         | <a href="#">SRTM CGIAR</a> <sup>26</sup>                         | 25.11.18                                                        | 20.09.19      | Raster   | 30 meters           |
| Rivers and lakes                  | DNGRH                                                            | 12.8.19                                                         | 19.9.19       | Polygon  | -                   |
| Primary streams                   | DNGRH                                                            | 12.8.19                                                         | 19.9.19       | Lines    | -                   |
| Flood extent, Idai                | UNOSAT/ <a href="#">Sentinel-1 (HDX)</a> <sup>27</sup>           | 19.03.19                                                        | 31.07.19      | Polygon  | -                   |
| Flood extent, Kenneth             | <a href="#">Copernicus EMSR354 (INGC Geonode)</a> <sup>28</sup>  | 02.05.19                                                        | 31.07.19      | Polygon  | -                   |
| Roads                             | <a href="#">OpenStreetMap (INGC Geonode)</a> <sup>29</sup>       | 25.11.18                                                        | 07.08.19      | Lines    | -                   |
| Road damages (Idai/Kenneth)       | <a href="#">LOG-WFP</a> <sup>30,31</sup>                         | <a href="#">19.03.19/03.05.19</a>                               | 23.09.19      | PDF file | -                   |
| Health facilities                 | <a href="#">SIS-MA (HDX)</a> <sup>32</sup>                       | 31.12.17                                                        | 08.08.19      | Points   | -                   |
| Health facilities damages         | Provided by WHO-Mozambique                                       | Represents health facility status 48h until 1 week post-cyclone | 17.09.19      | Points   | -                   |
| Population density                | <a href="#">Facebook/CIESIN population density</a> <sup>33</sup> | 01.10.18                                                        | 06.08.19      | Raster   | 30 meters           |

1  
2  
3 127 <sup>a</sup> Abbreviations: CIESN = Center for International Earth Science Information Network, DNGRH = National Directorate for  
4 128 Water Resource Management, HDX = Humanitarian Data Exchange, GDACS = Global Disaster Alert and Coordination  
5 129 System, INE = National Institute for Statistics Mozambique, INGC = National Institute for Disaster Management  
6 130 Mozambique, SIS-MA = Ministry of Health Mozambique, SRTM = Shuttle Radar Topography Mission, UN-OCHA ROSEA =  
7 131 United Nations Office for the Coordination of Humanitarian Affairs Southern and Eastern Africa, UNOSAT = United Nations  
8 132 Operational Satellite Applications Program, LOG-WFP = Logistics Cluster World Food Program

9 133 <sup>b</sup> Source date represents the imagery acquisition date for the flood extents and the release date for all other data  
10  
11  
12  
13  
14

## 15 135 **2.2 Data sources and preparation**

16  
17 136 The projection, resolution and alignment of geospatial data was processed using Quantum  
18 137 Geographical Information System (QGIS) (version 3.4)<sup>34</sup> and, to a limited extent, R (version  
19 138 3.5.2)<sup>35</sup>. As indicated in Table 1, most data layers were retrieved from open data platforms.  
20  
21 139 All rasters and shapefiles were saved in the projection system of Mozambique, i.e. UTM-37S  
22 140 [EPSG:32737]. The data preparation process is briefly described below and is fully detailed  
23 141 in Supplement 1.  
24  
25  
26  
27

28 142  
29  
30 143 Elevation data were obtained from the Shuttle Radar Topography Mission (SRTM) in tiles at  
31 144 a resolution of 30 meters and mosaiced to cover the whole country<sup>36</sup>. Slopes were derived  
32 145 from it and were accounted for when modelling walking movements.  
33  
34  
35

36 146  
37 147 Land cover data was downloaded for the whole African continent at 100 meter resolution  
38 148 from Copernicus Global Land Service<sup>25</sup> and was clipped to the extent of Mozambique. As  
39 149 analyses were carried out at 30-meter resolution, the land cover raster was resampled at a  
40 150 resolution of 30 meters, using nearest neighbor interpolation.  
41  
42  
43  
44

45 151  
46 152 The pre-cyclone road network dataset was retrieved from Open Street Map (OSM) through  
47 153 the Geonode Platform of the National Institute for Disaster Management Mozambique  
48 154 (INGC), and linked to the road damage information as indicated by the Logistics Cluster of  
49 155 the World Food Program (LOG-WFP)<sup>37,38</sup>. Historical post-cyclone status of roads and road  
50 156 segments were manually digitized from PDF maps provided by LOG-WFP. The maps were  
51 157 cross-referenced with the OSM road network layer, to include post-cyclone road damage  
52 158 status, (i.e. 1) open, 2) restricted, and 3) closed). Road damages as a consequence of  
53 159 cyclones Idai and Kenneth were taken from maps dated March 19 and May 3, 2019,  
54  
55  
56  
57  
58  
59  
60

1  
2  
3 160 respectively (Table 1)<sup>37,38</sup>. Information on road type and damage were combined in order to  
4  
5 161 obtain unique road type-damage combinations (Supplement 2).  
6

7 162

8  
9 163 Information on rivers and lake layout were obtained as shapefiles from the National  
10  
11 164 Directorate for Water Resource Management (DNGRH). Only primary rivers and lakes were  
12  
13 165 considered as barriers to movement, under the informed assumption that smaller rivers and  
14  
15 166 streams were passable by the population. This assumption was checked for several  
16  
17 167 instances against background satellite imagery. Flood extents for Idai (on 19 March 2019)  
18  
19 168 and Kenneth (on 2 May 2019) were sourced as shapefiles from Sentinel-1 and Copernicus  
20  
21 169 EMSR354, respectively<sup>27,28</sup>. The flood extents were visually inspected and found to be  
22  
23 170 largest on those two dates, and thus represent the biggest constraints for health care  
24  
25 171 access. All flooded areas were treated under two scenarios: 1) as being impassable, under  
26  
27 172 the assumption that people avoid traversing flood water to prevent further injury, 2) as  
28  
29 173 being passable by foot at an average walking speed of 1.5 km/h. In the first scenario, health  
30  
31 174 facilities located on flood extents were always treated as inaccessible since they are located  
32  
33 175 on barriers.

32 176

34 177 While cyclones impact entire populations, the burden disproportionately affects children  
35  
36 178 and women<sup>39</sup>. It is estimated that for cyclones Idai and Kenneth more than 50% of the  
37  
38 179 affected population were children, and with flood waters rising above 6 meters, their  
39  
40 180 movements to safety and health care were particularly limited<sup>5</sup>. Moreover, children under 5  
41  
42 181 represent the age group used as benchmark for child survival targets in both the Millennium  
43  
44 182 Development Goals (MDGs) and the Sustainable Development Goals (SDGs)<sup>40</sup>. In this  
45  
46 183 context and through the collaborative work with UNICEF, this analysis aimed at informing  
47  
48 184 the impact of the disasters on the burden for specific child health services that target  
49  
50 185 children under 5 (e.g. immunization).

51 186

52  
53 187 High-resolution population density estimates for children under five were obtained from the  
54  
55 188 Facebook Connectivity Lab and Center for International Earth Science Information Network  
56  
57 189 (CIESN)<sup>33</sup> with a 30-meter resolution. Although several gridded populations datasets are  
58  
59 190 available, the Facebook CIESN dataset was assumed to have the most realistic reallocation  
60  
191 of population to settlements<sup>41</sup>. In addition, other frequently used high-resolution gridded

1  
2  
3 192 population datasets, such as WorldPop<sup>42</sup>, use distances from roads and villages as  
4  
5 193 covariates, and this can produce collinearity when used in conjunction with accessibility  
6  
7 194 models. Population density was used to run zonal statistics on the cyclone-affected districts.  
8  
9 195 In this step the total population per district is summed and the estimated absolute number  
10  
11 196 of children under 5 that are able to reach a facility in a pre-defined travel time catchment  
12  
13 197 are calculated.

14 198

15  
16 199 Additionally, geographic coordinates of all villages (i.e. communities) in Idai-affected  
17  
18 200 districts were obtained from UNICEF Mozambique, which had gathered this information  
19  
20 201 through a community mapping initiative conducted by health officials, 6 to 8 months before  
21  
22 202 Cyclone Idai made landfall. These community locations were used to extract pre- and post-  
23  
24 203 cyclone travel time for each community to the nearest functional health center.  
25  
26 204 Unfortunately, geographic coordinates of villages in Kenneth-affected districts were not  
27  
28 205 available at the time of study.

29 206

30  
31 207 The geographic coordinates of all health facilities were sourced from the health  
32  
33 208 management information system, Ministry of Health in Mozambique (SIS-MA)<sup>32</sup>. Data  
34  
35 209 cleaning was undertaken in cases where the geographic coordinates for health facilities  
36  
37 210 were located outside the international border of Mozambique or for coordinates falling on  
38  
39 211 barriers to movement (Supplement 1). Information on damaged health facilities was  
40  
41 212 provided in tabular format by the World Health Organization (WHO). The health system in  
42  
43 213 Mozambique comprises 4 levels; the primary level consists of urban and rural health  
44  
45 214 centers, the secondary level consists of general, rural and district hospitals, the tertiary level  
46  
47 215 comprises provincial capital hospitals, and quaternary facilities comprise the central and  
48  
49 216 specialized hospitals<sup>43</sup>. Health facilities of all levels were included in the model.

50 217

51 218 Districts that were most affected by Cyclones Idai and Kenneth ("cyclone-affected districts",  
52  
53 219 thereafter) were identified in close collaboration with UNICEF and humanitarian responders.  
54  
55 220 All statistics presented below were calculated for these identified districts, with 26 such  
56  
57 221 districts in the Idai-affected region and 11 districts in the Kenneth-affected region (Figures  
58  
59 222 1a & 1b). Storm trajectories of both cyclones and road damages in both districts are also  
60  
223 presented (Figure 1c-1f).

224

### 225 **2.3 Geographical accessibility modelling**

226 To model travel times and accessibility coverages, we used AccessMod 5 (version 5.6.30), in  
227 particular the “accessibility” and “zonal statistics” modules<sup>21,44</sup>. AccessMod models  
228 geographical accessibility using terrain-based least-cost path distance calculation. This open-  
229 source software has been successfully applied in many different settings, among which  
230 accessibility and referral assessments of health facility networks, optimization modelling of  
231 health programs in obstetric and neonatal care (EmONC)<sup>45</sup>, primary health care<sup>46</sup>,  
232 emergency care<sup>47</sup>, referral times<sup>48</sup>, and treatment of fever cases<sup>49</sup>.

233

234 Using the “merge land cover” module in AccessMod, we overlaid the roads, rivers, lakes,  
235 flood extent, and landcover datasets to obtain a single 30-m resolution raster dataset, to  
236 which different travel scenarios were applied.

237

238 The travel scenarios (presented in Supplement 2) were derived using local information as  
239 model inputs on pre-cyclone and post-cyclone travel speeds and travel modes. Both  
240 scenarios were developed in close collaboration with UNICEF Mozambique, with focus on  
241 geographical accessibility to functional health facilities for the target population of children  
242 under 5. Post-cyclone travel speeds were adjusted for wet weather conditions as heavy  
243 rains persisted in the direct aftermath of both cyclones. During the post-cyclone situation,  
244 restricted and closed roads that were not inundated were assumed to be unpassable by any  
245 vehicle; but they were perceived to be accessible by foot. All landcover classes outside of  
246 the road network and the barriers were considered as passable. We assumed a functional  
247 bridge where a road segment crossed a river.

248

249 To account for uncertainty of the assumed travel speeds, we also considered both pre- and  
250 post-cyclone motorized travel speeds with a 20% slower and 20% faster speed, as adapted  
251 from Ouma et al.<sup>47</sup>. Accessibility coverage of the network of health centers was calculated at  
252 the 2-hour maximum travel time limit. This limit was deemed appropriate to capture the  
253 extent of effective access, and is often used in health accessibility studies, notably in  
254 maternal health<sup>45</sup>.

1  
2  
3 2554  
5 256

FIGURE 1

6  
7 257

---

**2.4 Patients and the public involvement**

258  
259 There was no patient or public involvement in this study. Health facility functionality status  
260 was shared in tabular format by WHO. All other geospatial data were publicly available.

261

**3. RESULTS**

262  
263 All statistics mentioned in the results are estimates of children covered by functional health  
264 facilities based on our accessibility model.

265

**3.1 Pre-cyclone accessibility**

266  
267 Pre-cyclone coverage in Idai-affected districts (Figure 2a) was highest in Cidade De Chimoio  
268 and Cidade Da Beira, with 99.8% and 99.5% of all children under 5 covered within the 2 hour  
269 catchment limit, respectively (Supplement 3). However, this coverage ranged from 35.8-  
270 99.8% in all Idai-affected districts (Supplement 3). Absolute pre-cyclone coverage was also  
271 highest in Cidade De Chimoio and Cidade Da Beira, where 57,476, and 66,135 children were  
272 within 2 hours travel time from a health facility (Figure 2). In Kenneth-affected districts  
273 (Figure 2b), pre-cyclone coverage was highest in Cidade De Pemba, where 100% of the  
274 children under 5 were expected to be able to reach a health facility within 2 hours travel  
275 time (Supplement 4). The lowest pre-cyclone coverage was seen in Mazeze, where only  
276 52.6% of children under 5 were within 2 hours travel time from a health facility (Supplement  
277 4). Absolute pre-cyclone coverage in Kenneth-affected districts was highest in Cidade De  
278 Pemba (n = 35,467 children) and Chiure (n= 18,257 children) (Figure 2). Pre-cyclone travel  
279 time rasters for the cyclone-affected areas were mapped (Figure 3A & Figure 4A).

280

281

FIGURE 2

282

283

**3.2 Losses in accessibility coverage**

284  
285 Geographical accessibility to health care decreased in the cyclone-affected districts, as a  
286 result of reduced travel speeds, road constraints and non-functional health facilities (Figure

287 3B and Figure 4B). Ratios of pre-cyclone and post-cyclone travel time rasters are mapped for  
 288 Idai-affected districts, with ratios close to 1 indicating similar travel times pre- and post-  
 289 cyclone, and ratios closer to 0 indicating large pre- and post-cyclone accessibility differences  
 290 (Figure 3C). The same results for Kenneth-affected districts are presented (Figure 4C).  
 291 Regions shown in red indicate localities with relatively large differences between pre- and  
 292 post-cyclone travel times (Figure 3C). In the Idai-affected region, especially in the districts  
 293 surrounding the flood water and closed roads, accessibility is severely impacted. In Idai-  
 294 affected districts, the percentage of children under 5 covered within 2 hours travel time,  
 295 generally decreased from 78.8% to 52.5%, implying that 136,941 previously-covered  
 296 children under 5, lost timely access to health care (Table 2).

297  
 298 **Table 2-** Overview of pre- and post-cyclone accessibility coverage in Idai and Kenneth-  
 299 affected districts.

| Cyclone | Travel time | Pre-cyclone               |                         | Post-cyclone              |                         |                                 |                               |
|---------|-------------|---------------------------|-------------------------|---------------------------|-------------------------|---------------------------------|-------------------------------|
|         |             | Children <5 covered (nr.) | Children <5 covered (%) | Children <5 covered (nr.) | Children <5 covered (%) | Children <5 coverage loss (nr.) | Children <5 coverage loss (%) |
| Idai    | 30 minutes  | 298,432                   | 57.3                    | 153,842                   | 29.5                    | 144,591                         | 27.7                          |
|         | 1 hour      | 346,409                   | 66.5                    | 206,610                   | 39.6                    | 139,799                         | 26.8                          |
|         | 2 hours     | 410,696                   | 78.8                    | 273,755                   | 52.5                    | 136,941                         | 26.3                          |
| Kenneth | 30 minutes  | 131,120                   | 72.0                    | 63,953                    | 48.8                    | 304,15                          | 23.2                          |
|         | 1 hour      | 99,056                    | 73.8                    | 86,997                    | 64.8                    | 12,060                          | 9.0                           |
|         | 2 hours     | 110,348                   | 82.2                    | 96,019                    | 71.5                    | 14,330                          | 10.7                          |

300  
 301 The largest relative accessibility coverage decline, within 2 hours travel time, was observed  
 302 in Machanga, where 77.6% of the previously covered population was no longer able to  
 303 access a facility under 2 hours in the aftermath of Idai (Figure 2). In terms of absolute  
 304 coverage, Nhamatanda was the most affected district, with a coverage loss of 25,121  
 305 children under 5, followed by Morrumbala (n = 19,554 children), Cidade Da Beira (n =  
 306 17,355 children), and Buzi (n= 9,949 children) (Figure 2). Uncertainty modelling, by  
 307 accounting for 20% slower and 20% faster motorized travel speeds<sup>47</sup>, indicated localities  
 308 with travel time differences up to 3-hours comparing slower and faster travel speeds (Figure  
 309 3D & Figure 4D). This information indicates where our travel time assumptions have the  
 310 largest effect on accessibility and coverage losses and where this may be either under- or  
 311 overestimated which can help guide resource allocation for decreasing this uncertainty.



1  
2  
3 312  
4  
5 313 Relative accessibility coverage in all Kenneth-affected districts decreased from 82.2% to  
6  
7 314 71.5%, corresponding to 14,330 children having lost access to the nearest facility within 2  
8  
9 315 hours travel time (Table 2). The most affected district in terms of relative coverage loss was  
10  
11 316 Macomia, where 88.9% of the children that were covered pre-cyclone lost access  
12  
13 317 (Supplement 3 & 4). Mazeze was the most affected district in terms of absolute coverage  
14  
15 318 loss, as 5,496 children lost access in the aftermath of cyclone Kenneth, followed by  
16  
17 319 Macomia (n= 3,727 children), Chiure (n= 2,307 children), Quissanga (n= 1,270 children) and  
18  
19 320 Mueda (n= 750 children) (Figure 2).

20 321  
21 322 Since flood waters slowly receded in the days/weeks after the cyclones, we ran an  
22  
23 323 additional scenario where flood waters were passable at a 1.5km/h walking speed.  
24  
25 324 Considering this scenario, absolute coverage losses for Idai-affected districts within 2 hours  
26  
27 325 travel time were highest in Morrumbala (n= 29,566 children), Nhamatanda (n= 25,758  
28  
29 326 children), Dacata (n= 8,914 children), and Bùzi (n= 8,757 children). In Kenneth-affected  
30  
31 327 districts, Mazeze (n= 6,167 children), Chiure (n= 4,684 children) and Macomia (n= 3,727  
32  
33 328 children) had the highest coverage losses in 2 hour catchments under the passable scenario.

34 329

### 35 330 **3.3 Travel time in affected communities**

36 331 The most affected villages in Idai-affected districts, in terms of reduced accessibility to the  
37  
38 332 nearest health facility were communities located in Bùzi and Muanza districts in Sofala  
39  
40 333 province. Mucinemo in Bùzi district was found to have a pre-cyclone travel time of 1.3 hours  
41  
42 334 to the nearest health facility. However, this travel time upsurged to 63.6 hours in the direct  
43  
44 335 aftermath of cyclone Idai (Supplements 5 & 6). Generally, the 6 most affected communities  
45  
46 336 in terms of accessibility in Idai-affected districts all had a pre-cyclone travel time between 1  
47  
48 337 hour and 3 hours, while all post-cyclone travel times increased to over 55 hours  
49  
50 338 (Supplement 6). Overall, post-cyclone accessibility ranged from some minutes up to 78  
51  
52 339 hours, with the highest travel time found in Chipota, in Muanza district.

53 340

54 341  
55  
56 342  
57  
58 343  
59  
60

---

FIGURE 3 & 4

---

### 344 **3.4 Health facility closures**

345 The effects of non-functioning health facilities were isolated by comparing two separate  
346 scenarios; 1) a post-cyclone scenario where all health facilities were considered functional,  
347 and 2) a post-cyclone scenario where modified functionality status was considered. By  
348 comparing these pre-cyclone and post-cyclone scenarios, the coverage losses caused by the  
349 transportation-specific disruptions (i.e. adjusted travel speeds and road constraints) could  
350 be isolated from the reduction in coverage due to the damage to health facilities (i.e. non-  
351 functional health facilities), providing a way to assess the likely impact of future programs  
352 aimed at reinforcing health facilities for disasters. In order to make these comparisons in  
353 this specific example, both scenarios were run under the assumption that flood waters were  
354 fully passable. In all other instances throughout the paper, flood waters were considered  
355 impassable. In case all health facilities remained functional in Idai-affected districts (i.e.  
356 disruption was due to transportation only), the overall coverage within 2 hours travel time  
357 would decrease from 79.3% to 57.7%, a difference of 21.6% (n = 112,538 children). Damage  
358 to health facilities caused an additional coverage decline of 5.3% (n = 27,840 children) in  
359 Idai-affected districts. However, hospital closures did not evenly affect all districts. In 17 out  
360 of 26 Idai-affected districts, hospital closures had no additional effect on accessibility.  
361 However, in the remaining 9 Idai-affected districts, hospital closures were responsible for an  
362 additional 1.9-59.7% coverage loss within 2 hours catchment. Health facility closures in  
363 Machanga affected the relative coverage the most, with 59.7% coverage loss (n= 3,642  
364 children) caused by non-functionality of 3 out of 6 health facilities. Absolute coverage losses  
365 as an effect of non-functional health facilities, were highest in Nhamatanda, where 12,946  
366 (31.0%) children under 5 years old lost access due to health facility closures. In  
367 Nhamatanda, 9 out of 16 health facilities became unfunctional as a consequence of Cyclone  
368 Idai. Health facility closures did not have an additional effect on post-cyclone accessibility in  
369 Kenneth-affected districts.

370

### 371 **4. DISCUSSION**

372 Accessibility coverage decreased and travel times substantially increased in the direct  
373 aftermath of the cyclones. Damage to transport networks and reduced travel speeds  
374 resulted in the most substantial accessibility coverage losses in both Idai- and Kenneth-  
375 affected districts. In Kenneth-affected districts, it was found that hospital closures did not

1  
2  
3 376 have an additional effect on post-cyclone accessibility this is likely caused by the fact that  
4  
5 377 flood extents and hospital closures were of much smaller magnitudes in the Kenneth-  
6  
7 378 affected region than in the Idai-affected region.  
8

9 379

10 380 In a post-disaster setting, access to health care is essential for effective response and  
11  
12 381 recovery<sup>50</sup>. The results of our study can be implemented beyond the response phase of the  
13  
14 382 cyclones. Although the emphasis of the results is on identification of decreased accessibility  
15  
16 383 coverage directly after the cyclones, the information presented here also provides a  
17  
18 384 platform for discussing health system recovery, mitigation and preparedness<sup>51</sup>.

19 385

20  
21 386 Early identification of underserved districts in the response phase can help reduce the  
22  
23 387 impacts caused by health service interruption, through targeted deployment of medical  
24  
25 388 services in districts with the largest accessibility coverage losses and lowest baseline  
26  
27 389 accessibility<sup>52</sup>. Information on accessibility coverage losses per cyclone-affected district can  
28  
29 390 support decision-making in the prioritization and planning of these medical services, by  
30  
31 391 targeting where the deployment of medical services reaches the highest number of people.  
32  
33 392 Growing access to open data and post-disaster information enables prompt accessibility  
34  
35 393 modelling in the aftermath of a natural disaster and the growing ability to quickly assemble  
36  
37 394 this data provides an opportunity to integrate accessibility modelling in the early response  
38  
39 395 phase of a natural disaster, so resources can be allocated in an informed way and health  
40  
41 396 impacts can be reduced. In this specific study, all data for an initial post-cyclone accessibility  
42  
43 397 study became available between 1 week and 1 month post-disaster (Table 1). This allows for  
44  
45 398 an accessibility analysis in the early stages of a disaster response. Generally, data on flood  
46  
47 399 extents and road damages, acquired from satellite imagery, were downloadable within 1  
48  
49 400 week post-disaster. Whereas information that had to be ground validated, such as health  
50  
51 401 facility functionality, became available approximately 1 month post-disaster.

52 402

53 403 Furthermore, the extensive damages to the road network will continue to limit movements  
54  
55 404 of the population, further complicating physical accessibility<sup>5</sup>. Our results indicate that road  
56  
57 405 damages are responsible for a relatively large loss of accessibility. This calls for a concerted  
58  
59 406 effort between road and health authorities when prioritizing reconstruction efforts. It was  
60  
407 estimated by WHO that damages to (health) infrastructure translated into 200,000 people

1  
2  
3 408 living more than 5 kilometers from a functioning health facility<sup>53</sup>. However, our results,  
4  
5 409 which provide a more realistic representation of accessibility, by accounting for topography,  
6  
7 410 barriers to movement, and population distribution, suggest this figure is an underestimate.  
8  
9 411 We estimated that as a result of the damage to infrastructure and barriers to movement,  
10  
11 412 314,591 children under 5 live further than 1 hour travelling from a functioning health  
12  
13 413 facility.

14 414

15  
16 415 Fourteen percent of all health facilities in Cyclone Idai- and Kenneth-affected cyclone-  
17  
18 416 districts have been damaged or fully destroyed, although more health facilities were  
19  
20 417 temporarily impacted in service provisioning due to flooding, electricity constraints or  
21  
22 418 damage to equipment<sup>14,54</sup>. While it is critical to restore access to essential health services as  
23  
24 419 soon as possible, the WHO reported that the reconstruction of all destructed and damaged  
25  
26 420 facilities may take up to 5 years<sup>14</sup>. To restore baseline accessibility, the establishment of  
27  
28 421 mobile outreach units, deployment of community health workers (CHWs), together with the  
29  
30 422 reconstruction of damaged facilities should be implemented. However, under the umbrella  
31  
32 423 of *Building Back Better* (BBB), rebuilding more resilient facilities and infrastructure, that are  
33  
34 424 able to withstand future hazards under the “Hospitals Safe from Disasters” approach, are  
35  
36 425 needed to prevent similar impacts in future disasters<sup>53,54</sup>. The results presented here show  
37  
38 426 the importance of joint efforts to reduce both impacts on health facilities and the existing  
39  
40 427 road network. However, resources are limited, and efficient financial planning is needed to  
41  
42 428 outline health system investment plans<sup>5,11</sup>. The results of our accessibility modelling can be  
43  
44 429 used to prioritize health facility reconstruction for facilities with highest accessibility  
45  
46 430 coverages. Cyclone Idai for instance, caused the destruction of the only tertiary hospital in 4  
47  
48 431 affected provinces that serves an estimated 12 million people<sup>50</sup>. Targeting hospitals with  
49  
50 432 coverage numbers like these, to be strengthened for future disaster impacts and to support  
51  
52 433 them in providing continuity of care in the aftermath of future disasters can help reduce  
53  
54 434 health losses<sup>55</sup>.

55 435

56 436 Due to the persisting health system disruption, humanitarian responders have identified the  
57  
58 437 need to deploy CHWs and mobile outreach services to cover accessibility losses caused by  
59  
60 438 the cyclones and to extend the reach of existing functional services<sup>50,56</sup>. These study findings  
439 439 can assist policymakers in identifying and prioritizing severely impacted districts and

1  
2  
3 440 communities and regions where deployment of CHWs can make a difference.

4  
5 441 Supplementary materials 3-6 present the most affected communities in terms of increased  
6  
7 442 travel time and coverage losses post-cyclone. These analyses can be routinely updated to  
8  
9 443 assess the effect of health system recovery on accessibility.

10 444 The districts that were most affected by Cyclone Idai and Kenneth were historically, and are  
11  
12 445 in the future, also prone to disasters due to their topography (i.e. due to their location as  
13  
14 446 low-lying coastal cities in the cyclone belt near the Indian Ocean)<sup>50,53</sup>. Ideally, accessibility  
15  
16 447 modelling could be applied to simulate the effects of historical disasters on accessibility, as  
17  
18 448 indicated in Supplement 5 and Supplement 6, so targeted preventive measures can be taken  
19  
20 449 for future disasters. Post-disaster accessibility modelling can help identify weak spots in  
21  
22 450 geographical accessibility to the health system and helps to distinguish pre-existing  
23  
24 451 accessibility gaps (Figure 3A and 4A) from accessibility coverage losses as a result of  
25  
26 452 disasters (Figure 3B and 4B). This information is essential in health system recovery,  
27  
28 453 strengthening and preparing for future disasters.

29 454

30 455 Limitations and uncertainties of this study were primarily linked to the data. While the  
31  
32 456 occurrence of natural disasters generally accelerates data availability in affected countries,  
33  
34 457 there also are challenges of data quality, consistency, and format<sup>57</sup>. In this study, data from  
35  
36 458 various sources were combined to represent the post-cyclone situation as realistically as  
37  
38 459 possible. But since data gathering was ongoing, it was expected that some data were  
39  
40 460 incomplete or not fully processed at the time of usage. Health facility coordinates had  
41  
42 461 duplicate occurrences in the database and health facility damages were solely indicated by  
43  
44 462 name, which resulted in manual spatial merging. Co-occurrences of rivers that were  
45  
46 463 indicated as floods were seen in the flood extent layer, minimally overestimating actual  
47  
48 464 flood extents in some parts of the affected regions. Besides post-disaster data uncertainty,  
49  
50 465 pre-disaster spatial data were also checked against background satellite imagery. The  
51  
52 466 hydrography of primary rivers stored in the data was found not to be fully representative for  
53  
54 467 actual hydrography in some regions. This could be a consequence of digitizing against a less  
55  
56 468 granular spatial resolution<sup>58</sup>. In some cases, passages and bridges were detected on satellite  
57  
58 469 background imagery where the OpenStreetMap road layer did not present presence of  
59  
60 470 roads. In places where hydrography was potentially overestimated and not all roads are  
471 471 mapped, isolated land pockets were created in the merged land cover. When modelling

1  
2  
3 472 accessibility in these land pockets the population is assumed to be fully isolated from health  
4  
5 473 care. In general, we would advise upon a more rigorous and sustainable data management  
6  
7 474 during and after humanitarian emergency operations to ensure the applicability of  
8  
9 475 spatiotemporal data analyses to quantify disaster impacts.

10 476  
11  
12 477 Next to data uncertainties, travel scenarios present a source of uncertainty as assumptions  
13  
14 478 on travel speeds and modes are uniformly generalized across regions. In addition, we  
15  
16 479 assumed that roads indicated as being restricted or closed were considered only passable by  
17  
18 480 foot if they were not inundated. However, some of the restricted roads were in fact  
19  
20 481 passable by 4x4 vehicles. Other means of transport (e.g., bicycle, motorcycle) may also have  
21  
22 482 been used in some places, which would increase accessibility to health centres. Since car  
23  
24 483 ownership and access to motorized transport by the target population was expected to be  
25  
26 484 very low, especially post-cyclone, it was decided to run the accessibility model for restricted  
27  
28 485 and closed roads only by means of walking.

29 486  
30  
31 487 Our accessibility modelling assumes that patients always travel to the nearest health facility.  
32  
33 488 However, literature has shown that patients sometimes bypass health facilities in search of  
34  
35 489 higher quality care in Mozambique<sup>59,60</sup>. Previous research, has shown that 30.8% of  
36  
37 490 pregnant women bypassed the nearest health facility in search of better prenatal care<sup>59</sup>.  
38  
39 491 Our results can therefore present slight underestimations of actual travel times.

40 492  
41  
42 493 Despite some of the limitations, the results presented here provide important initial  
43  
44 494 information for post-cyclone health system recovery which can be expanded through future  
45  
46 495 research. Since post-disaster needs continuously change based on the nature of the event  
47  
48 496 (e.g. receding flood waters, reconstruction efforts, and deployment of temporary medical  
49  
50 497 services), following studies should also be focused on the ability to dynamically model  
51  
52 498 accessibility based on these changes, so accessibility can be continuously monitored and  
53  
54 499 humanitarian service delivery can be updated accordingly in disaster-affected districts.  
55  
56 500 Additionally, it would be interesting to assess the effect of CHW deployment and mobile  
57  
58 501 outreach communities on improved accessibility and accessibility coverage estimates, to  
59  
60 502 quantify the effect of these interventions.

1  
2  
3 504 Post-disaster accessibility modelling can increase our understanding of spatial differences in  
4  
5 505 health care needs in the direct aftermath of a disaster and can help target limited resources  
6  
7 506 efficiently. Currently, there is no standardized approach in the humanitarian program cycle  
8  
9 507 to assess post-disaster accessibility losses against baseline accessibility<sup>17</sup>. The lack of a  
10  
11 508 standardized methodology to spatially assess disaster impacts on accessibility can result in  
12  
13 509 uncoordinated decision making for temporary health facility locations, introducing  
14  
15 510 duplication probability, and complicates prioritization in recovery efforts. The results in this  
16  
17 511 paper not only reflect the importance of incorporating accessibility modelling in early  
18  
19 512 disaster response, but also provide a platform for discussing health system recovery,  
20  
21 513 mitigation and preparedness.  
22  
23  
24  
25  
26  
27  
28  
29  
30  
31  
32  
33  
34  
35  
36  
37  
38  
39  
40  
41  
42  
43  
44  
45  
46  
47  
48  
49  
50  
51  
52  
53  
54  
55  
56  
57  
58  
59  
60

1  
2  
3 514 **ACKNOWLEDGEMENTS**  
4

5  
6 515 We thank Michelle Schmitz and Peter Macharia for useful comments on an earlier version of  
7  
8 516 the manuscript.  
9

10 517  
11  
12

13 518 **DECLARATION OF COMPETING INTEREST**  
14

15 519 The authors declare that they have no known competing financial interests or personal  
16  
17 520 relationships that could have appeared to influence the work reported in this paper.  
18  
19

20 521  
21  
22

23 522 **FUNDING STATEMENT**  
24

25 523 This study was partly funded by UNICEF.  
26  
27

28 524  
29

30 525 **AUTHOR CONTRIBUTION**  
31

32 526 **Fleur Hierink**: conceptualization, methodology, formal analysis, writing, editing,  
33  
34 527 visualization, supervision. **Nelson Rodrigues**: data sharing, methodology, writing, editing,  
35  
36 528 validation. **Maria Muñiz**: writing, editing. **Rocco Panciera**: methodology, writing, editing.  
37  
38 529 **Nicolas Ray**: conceptualization, methodology, writing, editing, validation, supervision.  
39  
40

41 530  
42  
43

44 531 **DATA SHARING STATEMENT**  
45

46  
47 532 Data available upon reasonable request. Most data used in this study are openly accessible  
48  
49 533 through the indicated data sources in Table 1. Other data are available upon request.  
50  
51  
52  
53  
54  
55  
56  
57  
58  
59  
60



## 534 REFERENCES

- 535 1. Delamater PL, Messina JP, Shortridge AM, et al. Measuring geographic access to health  
536 care: raster and network-based methods. *International journal of health geographics*  
537 2012;11(1):15.
- 538 2. Davis JR, Wilson S, Brock-Martin A, et al. The impact of disasters on populations with  
539 health and health care disparities. *Disaster medicine and public health preparedness*  
540 2010;4(1):30-38.
- 541 3. Abbas HB, Routray JK. A semi-quantitative risk assessment model of primary health care  
542 service interruption during flood: Case study of Aroma locality, Kassala State of  
543 Sudan. *International Journal of Disaster Risk Reduction* 2013;6:118-28.
- 544 4. Makanga PT, Schuurman N, Sacoor C, et al. Seasonal variation in geographical access to  
545 maternal health services in regions of southern Mozambique. *International journal*  
546 *of health geographics* 2017;16(1):1.
- 547 5. United Nations Office of Coordinated Humanitarian Affairs. Humanitarian Reponse Plan  
548 (2018-2019): revised following Cyclones Idai and Kenneth. May 2019.
- 549 6. Chen WH, Azman AS. Mitigating Cholera in the Aftermath of Cyclone Idai. *The American*  
550 *journal of tropical medicine and hygiene* 2019:tpmd190285.
- 551 7. World Health Organization. Relatório da Situação Nacional 11: 04 de Outubro de 2019,  
552 Período abrangido 9 a 22 de Setembro de 2019. 2019. [Available from]:  
553 [https://www.afro.who.int/sites/default/files/2019-](https://www.afro.who.int/sites/default/files/2019-10/National_SitRep%2011_MOZ_9%20a%2022%20de%20Setembro%202019_PORT.pdf)  
554 [10/National\\_SitRep%2011\\_MOZ\\_9%20a%2022%20de%20Setembro%202019\\_PORT.](https://www.afro.who.int/sites/default/files/2019-10/National_SitRep%2011_MOZ_9%20a%2022%20de%20Setembro%202019_PORT.pdf)  
555 [pdf](https://www.afro.who.int/sites/default/files/2019-10/National_SitRep%2011_MOZ_9%20a%2022%20de%20Setembro%202019_PORT.pdf)
- 556 8. Cambaza E, Mongo E, Anapakala E, et al. Outbreak of Cholera Due to Cyclone Kenneth in  
557 Northern Mozambique, 2019. *International journal of environmental research and*  
558 *public health* 2019;16(16):2925.
- 559 9. Willcock G. After Cyclones Idai and Kenneth, Recovery in Mozambique Continues:  
560 Reliefweb; 2019 [updated 17 May 2019. [Available from]:  
561 [https://reliefweb.int/report/mozambique/after-cyclones-idai-and-kenneth-recovery-](https://reliefweb.int/report/mozambique/after-cyclones-idai-and-kenneth-recovery-mozambique-continues)  
562 [mozambique-continues](https://reliefweb.int/report/mozambique/after-cyclones-idai-and-kenneth-recovery-mozambique-continues) accessed 16 Oct 2019.
- 563 10. UNICEF. Cyclone response mid-year sitrep #12: March-July 2019. 2019.
- 564 11. Devi S. Cyclone Idai: 1 month later, devastation persists. *The Lancet*  
565 2019;393(10181):1585.
- 566 12. Kahn R, Mahmud AS, Schroeder A, et al. Rapid Forecasting of Cholera Risk in  
567 Mozambique: Translational Challenges and Opportunities. *Prehospital and disaster*  
568 *medicine* 2019;34(5):557-62.
- 569 13. Santos E. Mozambique: The recovery from Cyclone Idai continues, but health needs  
570 remain [Report]. 3 May 2019 [[Available from]:  
571 [https://reliefweb.int/report/mozambique/mozambique-recovery-cyclone-idai-](https://reliefweb.int/report/mozambique/mozambique-recovery-cyclone-idai-continues-health-needs-remain)  
572 [continues-health-needs-remain.](https://reliefweb.int/report/mozambique/mozambique-recovery-cyclone-idai-continues-health-needs-remain)
- 573 14. World Health Organization. Cyclone Idai - events as they happen 2019 [updated 18 June  
574 2019. [Available from]: [https://www.who.int/emergencies/cyclone-idai/events-as-](https://www.who.int/emergencies/cyclone-idai/events-as-they-happen)  
575 [they-happen](https://www.who.int/emergencies/cyclone-idai/events-as-they-happen) accessed 16 October 2019.
- 576 15. International Federation of the Red Cross. Mozambique: Tropical Cyclones Idai and  
577 Kenneth 2019.
- 578 16. Muggy L, Stamm JLH. Dynamic, robust models to quantify the impact of decentralization  
579 in post-disaster health care facility location decisions. *Operations Research for*  
580 *Health Care* 2017;12:43-59.

- 1  
2  
3 581 17. World Health Organization. Post-Disaster Needs Assessments Guidelines. 2014.  
4 582 18. Humanitarian Data Exchange. Mozambique 2019 [[Available from]:  
5 583 <https://data.humdata.org/event/idai> accessed 25 April 2019.  
6 584 19. Tapia AH, Maldonado E, Tchouakeu LMN, et al. Coordinating humanitarian information.  
7 585 *Information Technology & People* 2012  
8 586 20. Thévenaz C, Resodihardjo SL. All the best laid plans... conditions impeding proper  
9 587 emergency response. *International Journal of Production Economics* 2010;126(1):7-  
10 588 21.  
11 589 21. Ray N, Ebener S. AccessMod 3.0: computing geographic coverage and accessibility to  
12 590 health care services using anisotropic movement of patients. *International journal of*  
13 591 *health geographics* 2008;7(1):63.  
14 592 22. Instituto Nacional de Estatística; United Nations Office for Coordination of Humanitarian  
15 593 Affairs Regional Office for Southern and Eastern Africa. Mozambique administrative  
16 594 level shapefiles. 2019. [Data set]. [Available from]:  
17 595 <https://data.humdata.org/dataset/mozambique-administrative-levels-0-3>. Accessed:  
18 596 Jul 07, 2019  
19 597 23. Global Disaster Alert and Coordination System. Overall Red alert Tropical Cyclone for  
20 598 IDAI-19. 2019. [Data set]. [Available from]:  
21 599 [https://www.gdacs.org/resources.aspx?eventid=1000552&episodeid=24&eventtype](https://www.gdacs.org/resources.aspx?eventid=1000552&episodeid=24&eventtype=TC)  
22 600 [=TC](https://www.gdacs.org/resources.aspx?eventid=1000552&episodeid=24&eventtype=TC). Accessed: March 2020  
23 601 24. Global Disaster Alert and Coordination System. Overall Red alert Tropical Cyclone for  
24 602 KENNETH-19. 2019. [Data set]. [Available from]:  
25 603 <https://www.gdacs.org/report.aspx?eventtype=TC&eventid=1000559&episodeid=12>  
26 604 . Accessed: March 2020  
27 605 25. Buchhorn M, Smets B, Bertels L, et al. Copernicus Global Land Service: Land Cover 100m,  
28 606 epoch "2015", Globe. 2019. Version V2.0.2. [Data set]. [Available from]:  
29 607 <https://lcviewer.vito.be/download> doi: 10.5281/zenodo.3243509. Accessed: 31 Jul,  
30 608 2019  
31 609 26. U.S. Geological Survey (USGS). Shuttle Radar Topography Mission 1 Arc-Second Global:  
32 610 SRTM1N22W016V3. 2000. [Data set]. [Available from]:  
33 611 <https://search.earthdata.nasa.gov/search> doi:  
34 612 10.5067/MEASURES/NASADEM/NASADEM\_SIM.001. Accessed: 20 Sept, 2019  
35 613 27. UN Operational Satellite Applications Programme (UNOSAT). UNOSAT Geospatial Data  
36 614 on Floods in Mozambique - March 2019. 2019. [Data set]. [Available from]:  
37 615 [https://data.humdata.org/dataset/unosat-analysis-on-floods-in-mozambique-](https://data.humdata.org/dataset/unosat-analysis-on-floods-in-mozambique-march-2019)  
38 616 [march-2019](https://data.humdata.org/dataset/unosat-analysis-on-floods-in-mozambique-march-2019). Accessed: 31 Jul, 2019  
39 617 28. Copernicus EMSR354. TC Kenneth Copernicus EMSR354 Flood Extent 20190502. 2019.  
40 618 [Data set]. [Available from]:  
41 619 [https://geonode.ingc.gov.mz/layers/geonode:emsr354\\_observedeventmerged\\_2019](https://geonode.ingc.gov.mz/layers/geonode:emsr354_observedeventmerged_20190502)  
42 620 [0502](https://geonode.ingc.gov.mz/layers/geonode:emsr354_observedeventmerged_20190502). Accessed: 31Jul, 2019  
43 621 29. OpenStreetMap. Osm Roads (Daily extract). 2018. [Data set]. [Available from]:  
44 622 [https://geonode.ingc.gov.mz/layers/geonode:osm\\_roads](https://geonode.ingc.gov.mz/layers/geonode:osm_roads). Accessed: 07 Aug, 2019  
45 623 30. World Food Program. Mozambique: Access Constraints as of 19 March 2019.  
46 624 [www.logcluster.org](http://www.logcluster.org), 2019. [Map]. [Available from]:  
47 625 [https://logcluster.org/sites/default/files/maps/moz\\_op\\_accessconstraints\\_a3p\\_201](https://logcluster.org/sites/default/files/maps/moz_op_accessconstraints_a3p_20190319.pdf)  
48 626 [90319.pdf](https://logcluster.org/sites/default/files/maps/moz_op_accessconstraints_a3p_20190319.pdf). Accessed: 23 Sept, 2019  
49  
50  
51  
52  
53  
54  
55  
56  
57  
58  
59  
60

- 1  
2  
3 627 31. World Food Program. Mozambique - Cabo Delgado - Access Constraints Map, 3 May  
4 628 2019. [www.logcluster.org](http://www.logcluster.org), 2019. [Map]. [Available from]:  
5 629 [https://logcluster.org/map/mozambique-cabo-delgado-access-constraints-map-3-](https://logcluster.org/map/mozambique-cabo-delgado-access-constraints-map-3-may-2019)  
6 630 [may-2019](https://logcluster.org/map/mozambique-cabo-delgado-access-constraints-map-3-may-2019). Accessed: 23 Sept, 2019
- 7 631 32. SIS-MA MMoH. Mozambique - Health facilities. 2019. [Data set]. [Available from]:  
8 632 <https://data.humdata.org/dataset/mozambique-health-facilities>. Accessed: 17 Sept,  
9 633 2019
- 10 634 33. Facebook Connectivity Lab and Center for International Earth Science Information  
11 635 Network - CIESIN - Columbia University. High Resolution Settlement Layer (HRSL).  
12 636 <https://data.humdata.org/dataset/highresolutionpopulationdensitymaps-moz> 2019  
13 637 [accessed 6 August 2019].
- 14 638 34. QGIS geographic information system [program], 2019.
- 15 639 35. R: A Language and Environment for Statistical Computing [program]. 5 version. Vienna,  
16 640 Austria: R Foundation for Statistical Computing, 2018.
- 17 641 36. Jarvis A, Reuter H, Nelson A, et al. Hole-field seamless SRTM data, International Centre  
18 642 for Tropical Agriculture (CIAT). <http://srtmcsicg.iar.org> 2008
- 19 643 37. LOG-WFP. Mozambique: Access Constraints as of 19 March 2019, 2019. [Map].  
20 644 [Available from]: [https://logcluster.org/map/mozambique-access-constraints-map-](https://logcluster.org/map/mozambique-access-constraints-map-19-march-2019)  
21 645 [19-march-2019](https://logcluster.org/map/mozambique-access-constraints-map-19-march-2019)
- 22 646 38. LOG-WFP. Mozambique - Cabo Delgado: Access constraints map 3 May 2019, 2019.  
23 647 [Map]. [Available from]: [https://logcluster.org/map/mozambique-cabo-delgado-](https://logcluster.org/map/mozambique-cabo-delgado-access-constraints-map-3-may-2019)  
24 648 [access-constraints-map-3-may-2019](https://logcluster.org/map/mozambique-cabo-delgado-access-constraints-map-3-may-2019)
- 25 649 39. UNICEF. Strategy for health (2016–2030). *New York: United Nations Children's Fund* 2015
- 26 650 40. Golding N, Burstein R, Longbottom J, et al. Mapping under-5 and neonatal mortality in  
27 651 Africa, 2000–15: a baseline analysis for the Sustainable Development Goals. *The*  
28 652 *Lancet* 2017;390(10108):2171-82.
- 29 653 41. Thematic Research Network on Data and Statistics (TReNDS). Leaving no one of the map:  
30 654 A guide for gridded population data for sustainable development. 2020. [Available  
31 655 from]:  
32 656 [https://static1.squarespace.com/static/5b4f63e14eddec374f416232/t/5eb2b65ec57](https://static1.squarespace.com/static/5b4f63e14eddec374f416232/t/5eb2b65ec575060f0adb1feb/1588770424043/Leaving+no+one+off+the+map-4.pdf)  
33 657 [5060f0adb1feb/1588770424043/Leaving+no+one+off+the+map-4.pdf](https://static1.squarespace.com/static/5b4f63e14eddec374f416232/t/5eb2b65ec575060f0adb1feb/1588770424043/Leaving+no+one+off+the+map-4.pdf)
- 34 658 42. Tatem AJ. WorldPop, open data for spatial demography. *Scientific data* 2017;4(1):1-4.
- 35 659 43. dos Anjos Luis A, Cabral P. Geographic accessibility to primary healthcare centers in  
36 660 Mozambique. *International journal for equity in health* 2016;15(1):173.
- 37 661 44. World Health Organization. Health economics: GeoAccess 2019 [[Available from]:  
38 662 <https://www.who.int/choice/geoaccess/en/> accessed 15 March 2019.
- 39 663 45. Ebener S, Stenberg K, Brun M, et al. Proposing standardised geographical indicators of  
40 664 physical access to emergency obstetric and newborn care in low-income and middle-  
41 665 income countries. *BMJ global health* 2019;4(Suppl 5)
- 42 666 46. Munoz UH, Källestål C. Geographical accessibility and spatial coverage modeling of the  
43 667 primary health care network in the Western Province of Rwanda. *International*  
44 668 *journal of health geographics* 2012;11(1):40.
- 45 669 47. Ouma PO, Maina J, Thurairana PN, et al. Access to emergency hospital care provided by  
46 670 the public sector in sub-Saharan Africa in 2015: a geocoded inventory and spatial  
47 671 analysis. *The Lancet Global Health* 2018;6(3):e342-e50.

- 1  
2  
3 672 48. Schmitz MM, Serbanescu F, Arnott GE, et al. Referral transit time between sending and  
4 673 first-line receiving health facilities: a geographical analysis in Tanzania. *BMJ global*  
5 674 *health* 2019;4(Suppl 5):e001568.
- 6 675 49. Alegana VA, Wright JA, Pentrina U, et al. Spatial modelling of healthcare utilisation for  
7 676 treatment of fever in Namibia. *International journal of health geographics*  
8 677 2012;11(1):6.
- 9 678 50. Moitinho de Almeida M, Guha-Sapir D. Why Mozambique's cyclones tell us disaster  
10 679 preparedness needs health at its core: The BMJ opinion 2019 [[Available from]:  
11 680 [https://blogs.bmj.com/bmj/2019/05/10/mozambiques-cyclones-disaster-](https://blogs.bmj.com/bmj/2019/05/10/mozambiques-cyclones-disaster-preparedness-needs-health-core/?utm_source=twitter&utm_medium=hootsuite&utm_term=&utm_content=&utm_campaign=editors)  
12 681 [preparedness-needs-health-](https://blogs.bmj.com/bmj/2019/05/10/mozambiques-cyclones-disaster-preparedness-needs-health-core/?utm_source=twitter&utm_medium=hootsuite&utm_term=&utm_content=&utm_campaign=editors)  
13 682 [core/?utm\\_source=twitter&utm\\_medium=hootsuite&utm\\_term=&utm\\_content=&](https://blogs.bmj.com/bmj/2019/05/10/mozambiques-cyclones-disaster-preparedness-needs-health-core/?utm_source=twitter&utm_medium=hootsuite&utm_term=&utm_content=&utm_campaign=editors)  
14 683 [tm\\_campaign=editors](https://blogs.bmj.com/bmj/2019/05/10/mozambiques-cyclones-disaster-preparedness-needs-health-core/?utm_source=twitter&utm_medium=hootsuite&utm_term=&utm_content=&utm_campaign=editors) accessed 17 December 2019.
- 15 684 51. Khan H, Vasilescu LG, Khan A. Disaster management cycle-a theoretical approach.  
16 685 *Journal of Management and Marketing* 2008;6(1):43-50.
- 17 686 52. Liu A, Sullivan S, Khan M, et al. Community health workers in global health: scale and  
18 687 scalability. *Mount Sinai Journal of Medicine: A Journal of Translational and*  
19 688 *Personalized Medicine* 2011;78(3):419-35.
- 20 689 53. World Health Organization. As post-cyclone resettlement, 200 000 people lack access to  
21 690 health services in Mozambique. Reliefweb, 2019.
- 22 691 54. World Health Organization. Hospitals safe from disasters: Reduce risk, protect health  
23 692 facilities, save lives. 2007.
- 24 693 55. World Health Organization. Natural disasters: protecting the public's health. Natural  
25 694 disasters: protecting the public's health2000.
- 26 695 56. UNICEF. One year after Cyclone Idai, 2.5 million people in Mozambique remain in need  
27 696 of humanitarian assistance: UNICEF prepares for more frequent and ferocious  
28 697 disasters as a result of the climate crisis 2020 [[Available from]:  
29 698 [https://www.unicef.org/mozambique/en/press-releases/one-year-after-cyclone-](https://www.unicef.org/mozambique/en/press-releases/one-year-after-cyclone-idai-25-million-people-mozambique-remain-need-humanitarian)  
30 699 [idai-25-million-people-mozambique-remain-need-humanitarian](https://www.unicef.org/mozambique/en/press-releases/one-year-after-cyclone-idai-25-million-people-mozambique-remain-need-humanitarian) accessed 16 March  
31 700 2020.
- 32 701 57. Altay N, Labonte M. Challenges in humanitarian information management and  
33 702 exchange: evidence from Haiti. *Disasters* 2014;38(s1):S50-S72.
- 34 703 58. Nelson T, Wulder M, Niemann K. Spatial resolution implications of digitizing aerial  
35 704 photography for environmental applications. *The Imaging Science Journal*  
36 705 2001;49(4):223-32.
- 37 706 59. Yao J, Agadjanian V. Bypassing health facilities in rural Mozambique: spatial,  
38 707 institutional, and individual determinants. *BMC health services research*  
39 708 2018;18(1):1006.
- 40 709 60. Keyes EB, Parker C, Zissette S, et al. Geographic access to emergency obstetric services:  
41 710 a model incorporating patient bypassing using data from Mozambique. *BMJ Global*  
42 711 *Health* 2019;4(Suppl 5):e000772.
- 43 712  
44 713  
45  
46  
47  
48  
49  
50  
51  
52  
53  
54  
55  
56  
57  
58  
59  
60

1  
2  
3 714 **Figure legends:**  
4  
5 715

6 716 **Figure 1 - Cyclone affected districts, cyclone trajectory, and road damages.** (A) Idai affected  
7 717 districts. (B) Kenneth affected districts. (C) Idai cyclone trajectory\*. (D) Kenneth cyclone  
8 718 trajectory\*. (E) Road damages in Idai-affected districts. (F) Road damages in Kenneth-  
9 719 affected districts. \*Cyclone paths as reported on Global Disaster Alert and Coordination System  
10 720 (GDACS)<sup>25,26</sup>.  
11  
12 721

13  
14 722 **Figure 2- Absolute and relative reduction in population coverage pre- and post-cyclone**  
15 723 **Idai (A) and Kenneth (B).** Labels on top of bars indicate absolute reduction in population  
16 724 coverage of children under 5. Labels under districts indicate relative reduction in population  
17 725 coverage. Maximum limits of the bars indicate the absolute pre-cyclone coverage within 2  
18 726 hours travel time. Limits of the blue filled bar indicate the absolute post-cyclone coverage.  
19 727 The x-axis is ordered according to relative reduction in population coverage.  
20  
21 728

22  
23  
24 729 **Figure 3 – Accessibility modelling results for Idai districts.** Pre-cyclone travel time raster  
25 730 (A). Post-cyclone travel time raster (B). Difference ratio raster between pre- and post-  
26 731 cyclone travel time (C). Uncertainty raster, as a result of the difference between -20% and  
27 732 +20% travel speed accessibility (D).  
28  
29 733

30  
31 734 **Figure 4 – Accessibility modelling results in Kenneth districts.** Pre-cyclone travel time raster  
32 735 (A). Post-cyclone travel time raster (B). Difference ratio raster between pre- and post-  
33 736 cyclone travel time (C). Uncertainty raster, as a result of the difference between -20% and  
34 737 +20% travel speed accessibility (D).  
35  
36 738  
37  
38  
39  
40  
41  
42  
43  
44  
45  
46  
47  
48  
49  
50  
51  
52  
53  
54  
55  
56  
57  
58  
59  
60

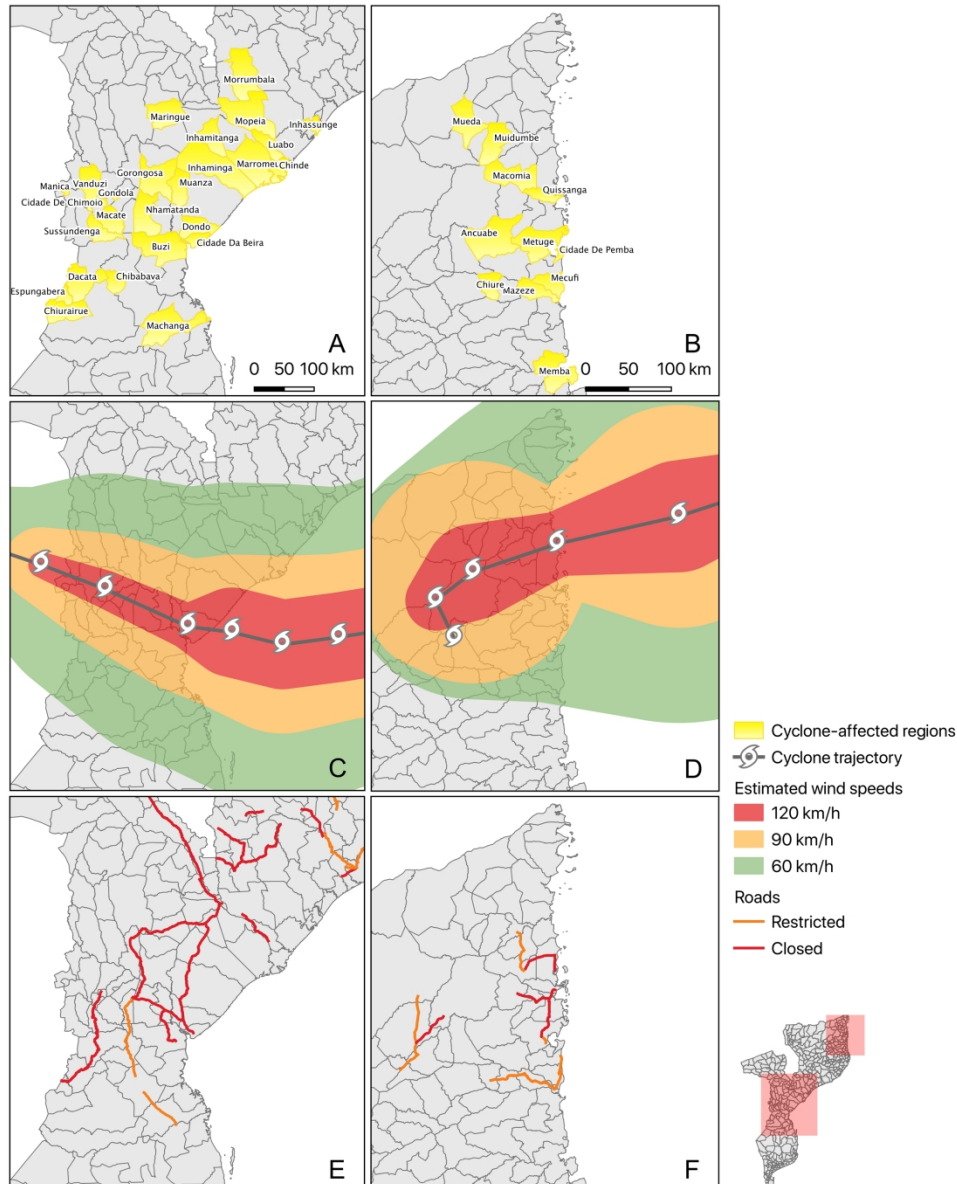

Figure 1 - Cyclone affected districts, cyclone trajectory, and road damages. (A) Idai affected districts. (B) Kenneth affected districts. (C) Idai cyclone trajectory\*. (D) Kenneth cyclone trajectory\*. (E) Road damages in Idai-affected districts. (F) Road damages in Kenneth-affected districts. \*Cyclone paths as reported on Global Disaster Alert and Coordination System (GDACS)25,26.

236x292mm (300 x 300 DPI)



Figure 2- Absolute and relative reduction in population coverage pre- and post-cyclone Idai (A) and Kenneth (B). Labels on top of bars indicate absolute reduction in population coverage of children under 5. Labels under districts indicate relative reduction in population coverage. Maximum limits of the bars indicate the absolute pre-cyclone coverage within 2 hours travel time. Limits of the blue filled bar indicate the absolute post-cyclone coverage. The x-axis is ordered according to relative reduction in population coverage.

2777x1736mm (72 x 72 DPI)

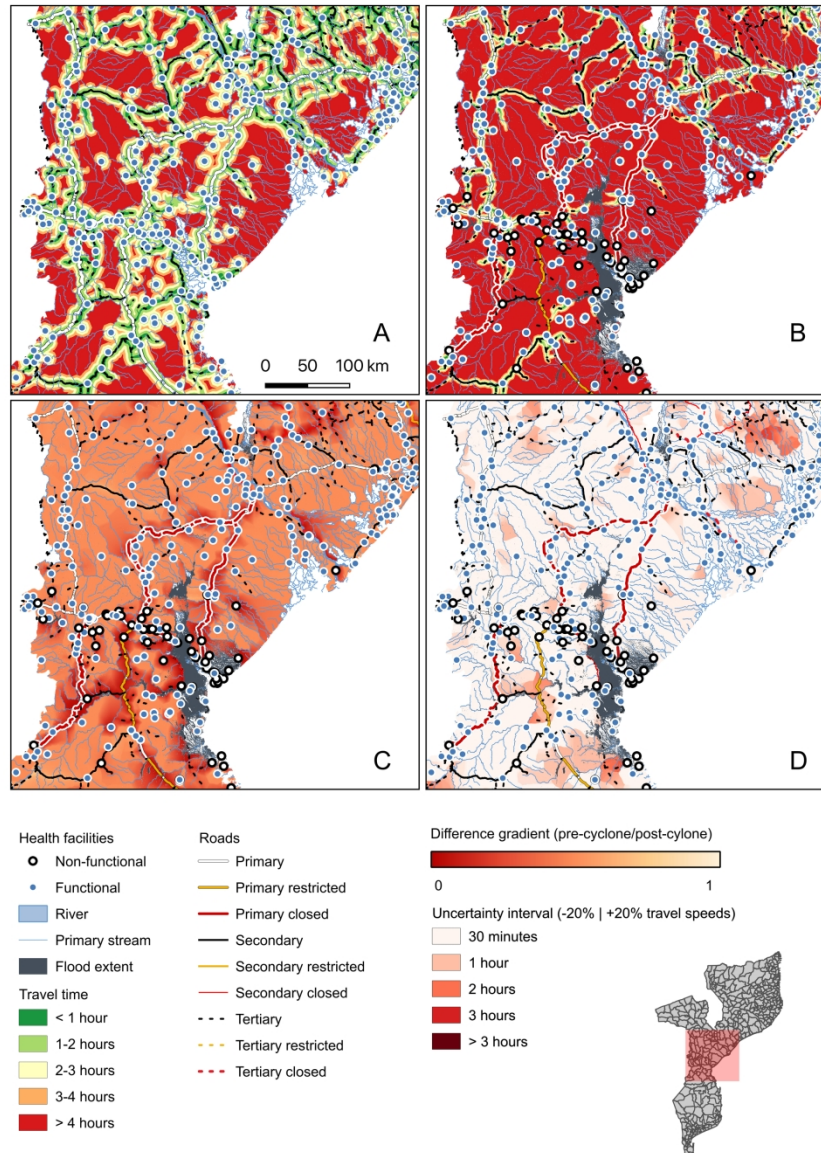

45 Figure 3 – Accessibility modelling results for Idai districts. Pre-cyclone travel time raster (A). Post-cyclone  
 46 travel time raster (B). Difference ratio raster between pre- and post-cyclone travel time (C). Uncertainty  
 47 raster, as a result of the difference between -20% and +20% travel speed accessibility (D).

48 209x296mm (300 x 300 DPI)



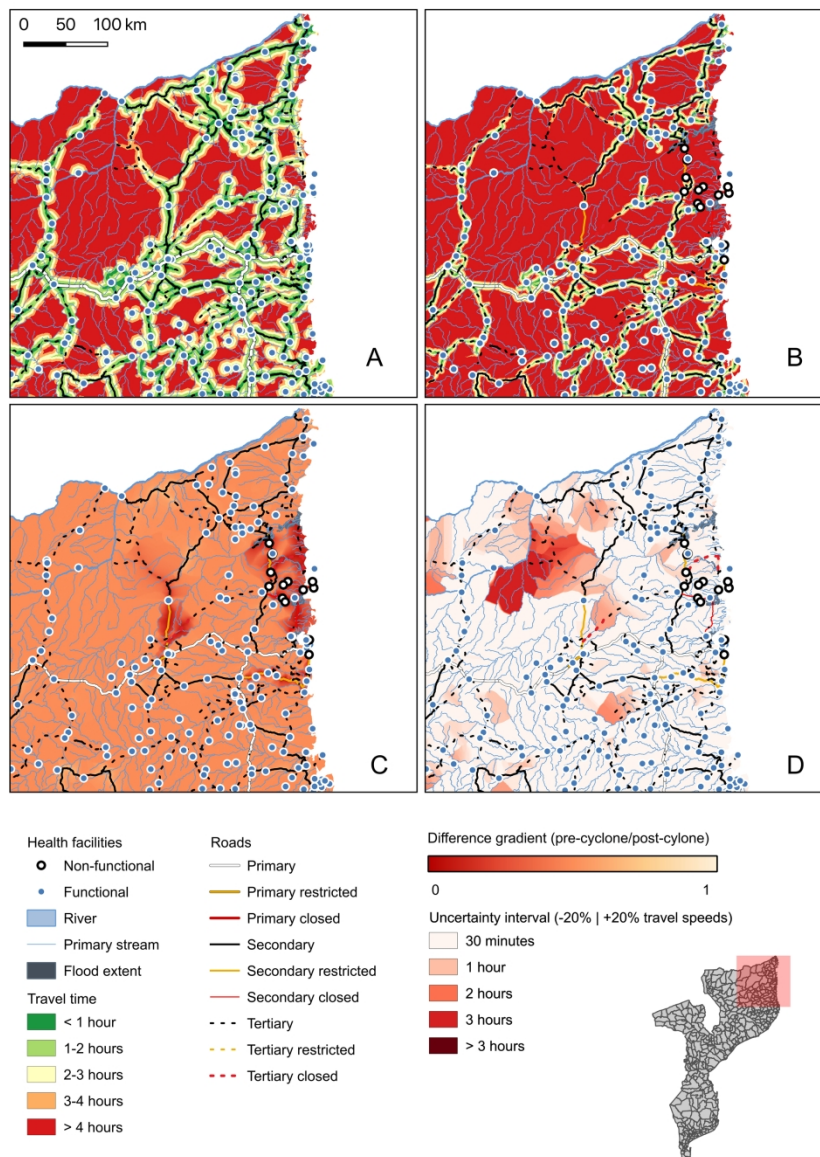

Figure 4 – Accessibility modelling results in Kenneth districts. Pre-cyclone travel time raster (A). Post-cyclone travel time raster (B). Difference ratio raster between pre- and post-cyclone travel time (C). Uncertainty raster, as a result of the difference between -20% and +20% travel speed accessibility (D).

209x296mm (300 x 300 DPI)

## SUPPLEMENTAL MATERIAL

### **Supplement 1-Data preparation for use in AccessMod**

All data preparation was carried out in Quantum Geographical Information System (QGIS) (version 3.4)<sup>24</sup> in limited combination with R (version 3.5.2)<sup>25</sup>. As indicated in Table 1, most data layers were retrieved from open data platforms. All raster- and shapefiles were saved in the projection system of Mozambique, i.e. UTM-37S [EPSG:32737]. All raster files were aligned using the digital elevation model (DEM) as reference. The data preparation process is fully described below for each data set.

#### *Elevation*

Anisotropic accessibility analyses, in other words analyses accounting for travel speeds on slopes, were carried out for this study. Elevation data were obtained from the Shuttle Radar Topography Mission (SRTM) in tiles at a resolution of 30 meters and mosaiced to cover the whole country<sup>38</sup>. Slopes were derived from it and accounted for when modelling walking movements.

#### *Land cover*

The land cover data set of the African continent<sup>27</sup> was clipped to the extent of Mozambique, leaving a small buffer around the country to prevent loss of data cells at the border. The data set was resampled at a resolution of 30 meters using nearest neighbor interpolation.

#### *Road network*

The pre-cyclone road network dataset was retrieved from Open Street Map (OSM) through the Geonode Platform of the National Institute for Disaster Management Mozambique (INGC), as this dataset was perceived to represent the most recent information on the roads and could be linked to the damaged roads, as indicated by the Logistics Cluster of the World Food Program (LOG-WFP). Road classes that were not indicated as official classification by OSM, were removed from the data<sup>48</sup>.

LOG-WFP provided the most up to date data on road network damages. However, the road constraint shapefile was updated frequently by overwriting previous versions, without

1  
2  
3 storing data historically. Therefore, historical post-cyclone status of roads and road  
4 segments was manually digitized from PDF maps provided by LOG-WFP<sup>28,29</sup>. The PDF maps  
5 were manually cross-referenced with the OSM road network layer, to include post-cyclone  
6 status, i.e. 1) open 2) restricted 3) closed.  
7  
8  
9

10  
11  
12 Roads were then reclassified based on the unique combination of road type and post-  
13 cyclone status, resulting in 34 unique road classes (e.g. primary road, primary road  
14 restricted, secondary road closed). All roads were given a specific travel speed, accounting  
15 for the different scenarios. In the pre-cyclone scenario for instance, all primary road classes  
16 (i.e. primary road, primary road restricted, primary road closed) had the same travel speed.  
17  
18 Whereas in the post cyclone scenario, the restricted and closed road types had a travel  
19 speed and travel mode accounted for their damages, as can be seen from Supplement 2.  
20  
21  
22  
23  
24  
25

### 26 27 *Barriers to movement*

28  
29 Rivers and lake shapefiles were obtained as lines and polygons from the National  
30 Directorate for Water Resource Management (DNGRH) and accuracy was checked using  
31 satellite imagery as a reference, using Microsoft Bing Imagery as a background through the  
32 QGIS QuickMapServices Plugin. Only primary rivers and lakes were taken for the analyses,  
33 under the assumption that smaller rivers and streams were passable by the population.  
34  
35 Water bodies were perceived as being impassable at all scales.  
36  
37  
38  
39  
40

41  
42 Flood extent caused by Cyclone Idai was taken from 19 March 2019 and flood extent for  
43 Cyclone Kenneth was taken from 2 May 2019, because extents were visually inspected and  
44 found to be largest on those dates and thus represent the biggest constraints for health care  
45 access. All flooded areas were treated as impassable at those dates, considering the depth  
46 and extent of the floods.  
47  
48  
49  
50

### 51 52 *Population data*

53  
54 High resolution population density estimates for children under five were downloaded at 30  
55 meter resolution from the Facebook Connectivity Lab and Center for International Earth  
56 Science Information network<sup>30</sup>. The raster was projected in Mozambique's projection  
57 system, UTM-37S [EPSG:32737], by using nearest neighbor interpolation. Loss of population  
58  
59  
60

1  
2  
3 caused by reprojection and clipping to country borders, was corrected for by smoothing the  
4 lost population equally over the raster cells. This was done by using a multiplication factor  
5 of the difference between the total sum of population before and after data processing  
6 using the raster calculator.  
7  
8  
9

### 10 11 12 *Health facilities*

13  
14 The geographic coordinates of all health facilities were obtained through the Humanitarian  
15 Data Exchange platform (HDX) and were originally sourced from the Ministry of Health in  
16 Mozambique (SIS-MA)<sup>34</sup>. The data was cleaned to exclude coordinates far outside of the  
17 country borders. Coordinates that fell just outside Mozambique were relocated within the  
18 country extents. Five health facilities were cross-referenced with other data sources (e.g.  
19 Neonatal Inventory Survey UNICEF, OpenStreetMap, Google Maps) because they were  
20 located on barriers, such as open sea, rivers or lakes.  
21  
22  
23  
24  
25  
26  
27  
28

29 Information on damaged health facilities was provided by the World Health Organization  
30 (WHO). This data did not include GPS coordinates, thus names of the damaged health  
31 facilities were cross referenced with the original health facility shapefile to include post-  
32 cyclone status of each facility, i.e. functional or non-functional. For damaged health facilities  
33 that were not included in the original health facility shapefile, coordinates were retrieved  
34 from a neonatal inventory performed by United Nations Children Fund (UNICEF) and also  
35 added as facility to the original health facility data, representing the pre-cyclone situation.  
36 Non-functional health facilities were filtered-out for geographical accessibility analyses  
37 reflecting the post-cyclone scenarios.  
38  
39  
40  
41  
42  
43  
44  
45  
46  
47

### 48 *Travel scenario*

49 Both our travel scenarios were developed in close collaboration with country  
50 representatives from UNICEF and were adapted to our target population, namely children  
51 under five accompanied by a parent (Supplement 2). Flood waters were assumed to be a full  
52 barrier to movement to the target population, thus health facilities located in flooded zones  
53 were completely inaccessible and flood waters were impassable.  
54  
55  
56  
57  
58  
59  
60

1  
2  
3  
4  
5  
6  
7  
8  
9  
10  
11  
12  
13  
14  
15  
16  
17  
18  
19  
20  
21  
22  
23  
24  
25  
26  
27  
28  
29  
30  
31  
32  
33  
34  
35  
36  
37  
38  
39  
40  
41  
42  
43  
44  
45  
46  
47  
48  
49  
50  
51  
52  
53  
54  
55  
56  
57  
58  
59  
60

## Supplement 2- Travel scenarios pre-cyclone and post-cyclone

| Label                              | Pre-cyclone         |             | Post-cyclone        |             |
|------------------------------------|---------------------|-------------|---------------------|-------------|
|                                    | Travel speed (km/h) | Travel mode | Travel speed (km/h) | Travel mode |
| Shrubs                             | 3                   | Walking     | 1.5                 | Walking     |
| Herbaceous Vegetation              | 3                   | Walking     | 1.5                 | Walking     |
| Cultivated and Managed Vegetation  | 3                   | Walking     | 1.5                 | Walking     |
| Agriculture Cropland               |                     |             |                     |             |
| Urban Built Up                     | 3                   | Walking     | 1.5                 | Walking     |
| Bare Sparse Vegetation             | 3                   | Walking     | 1.5                 | Walking     |
| Permanent Water Bodies             | 3                   | Walking     | 1.5                 | Walking     |
| Temporary Water Bodies             | 3                   | Walking     | 1.5                 | Walking     |
| Herbaceous Wetland                 | 3                   | Walking     | 1.5                 | Walking     |
| Closed Forest Evergreen Broad Leaf | 3                   | Walking     | 1.5                 | Walking     |
| Closed Forest Deciduous Broad Leaf | 3                   | Walking     | 1.5                 | Walking     |
| Open Forest Evergreen Broad Leaf   | 3                   | Walking     | 1.5                 | Walking     |
| Open Forest Deciduous Broad Leaf   | 3                   | Walking     | 1.5                 | Walking     |
| Open Sea                           | 3                   | Walking     | 1.5                 | Walking     |
| Trunk                              | 80                  | Motorized   | 50                  | Motorized   |
| Trunk Restricted                   | 80                  | Motorized   | 1.5                 | Walking     |
| Trunk Closed                       | 80                  | Motorized   | 1.5                 | Walking     |
| Primary                            | 80                  | Motorized   | 50                  | Motorized   |
| Primary Restricted                 | 80                  | Motorized   | 1.5                 | Walking     |
| Primary Closed                     | 80                  | Motorized   | 1.5                 | Walking     |
| Secondary                          | 50                  | Motorized   | 40                  | Motorized   |
| Secondary Restricted               | 50                  | Motorized   | 1.5                 | Walking     |
| Secondary Closed                   | 50                  | Motorized   | 1.5                 | Walking     |
| Tertiary                           | 30                  | Motorized   | 15                  | Motorized   |
| Tertiary Closed                    | 30                  | Motorized   | 1.5                 | Walking     |
| Tertiary Restricted                | 30                  | Motorized   | 1.5                 | Walking     |
| Road                               | 20                  | Motorized   | 10                  | Motorized   |
| Raceway                            | 3                   | Walking     | 3                   | Walking     |
| Residential                        | 20                  | Motorized   | 10                  | Motorized   |
| Residential Closed                 | 20                  | Motorized   | 1.5                 | Walking     |
| Living Street                      | 20                  | Motorized   | 10                  | Motorized   |
| Service                            | 3                   | Walking     | 1.5                 | Walking     |
| Track                              | 15                  | Motorized   | 10                  | Motorized   |
| Pedestrian                         | 3                   | Walking     | 1.5                 | Walking     |
| Pier                               | 3                   | Walking     | 1.5                 | Walking     |
| Path Closed                        | 3                   | Walking     | 1.5                 | Walking     |
| Path                               | 3                   | Walking     | 1.5                 | Walking     |
| Footway                            | 3                   | Walking     | 1.5                 | Walking     |
| Bridleway                          | 3                   | Walking     | 1.5                 | Walking     |
| Cycleway                           | 3                   | Walking     | 1.5                 | Walking     |
| Steps                              | 3                   | Walking     | 1.5                 | Walking     |
| Unclassified                       | 3                   | Walking     | 1.5                 | Walking     |

**Supplement 3- Relative population coverage pre- and post-cyclone Idai.** Ordered on relative difference. Difference indicated between parentheses. Error bars indicate the coverage uncertainty, considering -20% and +20% travel speeds.



view only

**Supplement 4- Relative population coverage pre- and post-cyclone Kenneth.** Ordered on relative difference. Difference indicated between parentheses. Error bars indicate the coverage uncertainty, considering -20% and +20% travel speeds.



view only

**Supplement 5- Travel time per community in Idai affected districts. Fifty most affected communities by means of accessibility loss. Ordered on absolute travel time difference.**

| Community         | District  | Pre-cyclone travel time (h) | Post-cyclone travel time (h) | Difference pre- and post-cyclone (h) |
|-------------------|-----------|-----------------------------|------------------------------|--------------------------------------|
| Mucinemo          | Buzi      | 1.3                         | 63.6                         | 62.3                                 |
| Bupira            | Buzi      | 1.1                         | 62.3                         | 61.3                                 |
| Massuinda         | Buzi      | 1.2                         | 60.1                         | 58.9                                 |
| Njanga            | Buzi      | 4.3                         | 59.1                         | 54.7                                 |
| Guenje-Sede       | Buzi      | 2.9                         | 57.3                         | 54.4                                 |
| Mbereaizique      | Buzi      | 2.9                         | 57.3                         | 54.4                                 |
| Shinizia Chinhale | Muanza    | 24.0                        | 77.8                         | 53.8                                 |
| Chipota           | Muanza    | 24.4                        | 78.0                         | 53.6                                 |
| Wiriquizi         | Muanza    | 22.2                        | 74.1                         | 51.9                                 |
| Chingamuzi        | Muanza    | 22.7                        | 74.5                         | 51.8                                 |
| Mussacazwidje     | Buzi      | 3.5                         | 55.3                         | 51.8                                 |
| Mussacazwidje     | Buzi      | 3.5                         | 55.3                         | 51.8                                 |
| Magua             | Buzi      | 4.8                         | 56.6                         | 51.8                                 |
| Nkolone Praia     | Muanza    | 20.7                        | 72.3                         | 51.7                                 |
| Mukulumba 1       | Muanza    | 20.4                        | 71.8                         | 51.4                                 |
| Mukulumba cidade  | Muanza    | 20.2                        | 71.4                         | 51.2                                 |
| Nhanganga         | Muanza    | 19.9                        | 70.8                         | 50.9                                 |
| Mutanda           | Buzi      | 5.4                         | 55.3                         | 49.9                                 |
| Macova-Mutanda    | Buzi      | 6.3                         | 55.1                         | 48.9                                 |
| Puanda            | Buzi      | 2.9                         | 51.6                         | 48.7                                 |
| Luanda 1          | Muanza    | 18.8                        | 67.4                         | 48.6                                 |
| Nhamacalango      | Muanza    | 17.4                        | 65.8                         | 48.4                                 |
| Sengo             | Dondo     | 5.3                         | 53.5                         | 48.2                                 |
| Luanda 2          | Muanza    | 18.0                        | 65.8                         | 47.8                                 |
| Praia Nova        | Dondo     | 3.9                         | 51.5                         | 47.6                                 |
| Praia Farol       | Dondo     | 3.8                         | 51.4                         | 47.6                                 |
| Bingue Sede       | Muanza    | 16.4                        | 63.8                         | 47.4                                 |
| Nkonde 2          | Muanza    | 16.4                        | 63.8                         | 47.4                                 |
| Massitche         | Dondo     | 7.1                         | 54.5                         | 47.4                                 |
| Goonda Majaca     | Chibabava | 6.5                         | 53.3                         | 46.8                                 |
| Ngomole           | Muanza    | 10.1                        | 56.7                         | 46.6                                 |
| Ngalazi           | Dondo     | 6.0                         | 52.3                         | 46.3                                 |
| Nhacudjica        | Buzi      | 6.3                         | 52.4                         | 46.1                                 |
| Chitundo          | Dondo     | 2.0                         | 47.7                         | 45.7                                 |
| Macarate          | Chibabava | 5.3                         | 51.0                         | 45.7                                 |
| Nhamissassa       | Muanza    | 15.9                        | 61.5                         | 45.6                                 |
| Docue             | Buzi      | 5.7                         | 51.3                         | 45.6                                 |
| Khome 1           | Dondo     | 1.4                         | 46.8                         | 45.4                                 |
| Nherere 2         | Muanza    | 14.0                        | 59.0                         | 45.0                                 |
| Parange           | Buzi      | 3.6                         | 48.6                         | 45.0                                 |
| Njocho            | Buzi      | 5.9                         | 50.9                         | 45.0                                 |
| Binda             | Machanga  | 0.7                         | 45.2                         | 44.6                                 |
| Khome 2           | Dondo     | 0.6                         | 45.2                         | 44.6                                 |
| Veruca            | Chibabava | 4.1                         | 48.6                         | 44.5                                 |
| Mamunge           | Buzi      | 5.1                         | 49.2                         | 44.1                                 |
| Birirane          | Muanza    | 13.1                        | 57.2                         | 44.1                                 |
| Vala-vala         | Buzi      | 5.2                         | 49.2                         | 44.1                                 |
| Muche             | Gorongosa | 1.5                         | 45.5                         | 44.0                                 |
| Machiquire        | Buzi      | 2.6                         | 46.1                         | 43.5                                 |
| Nhazwicasse       | Gorongosa | 1.0                         | 44.5                         | 43.5                                 |



Supplement 6- Travel time per community in Idai-affected districts. Point locations of communities in Idai-affected districts.

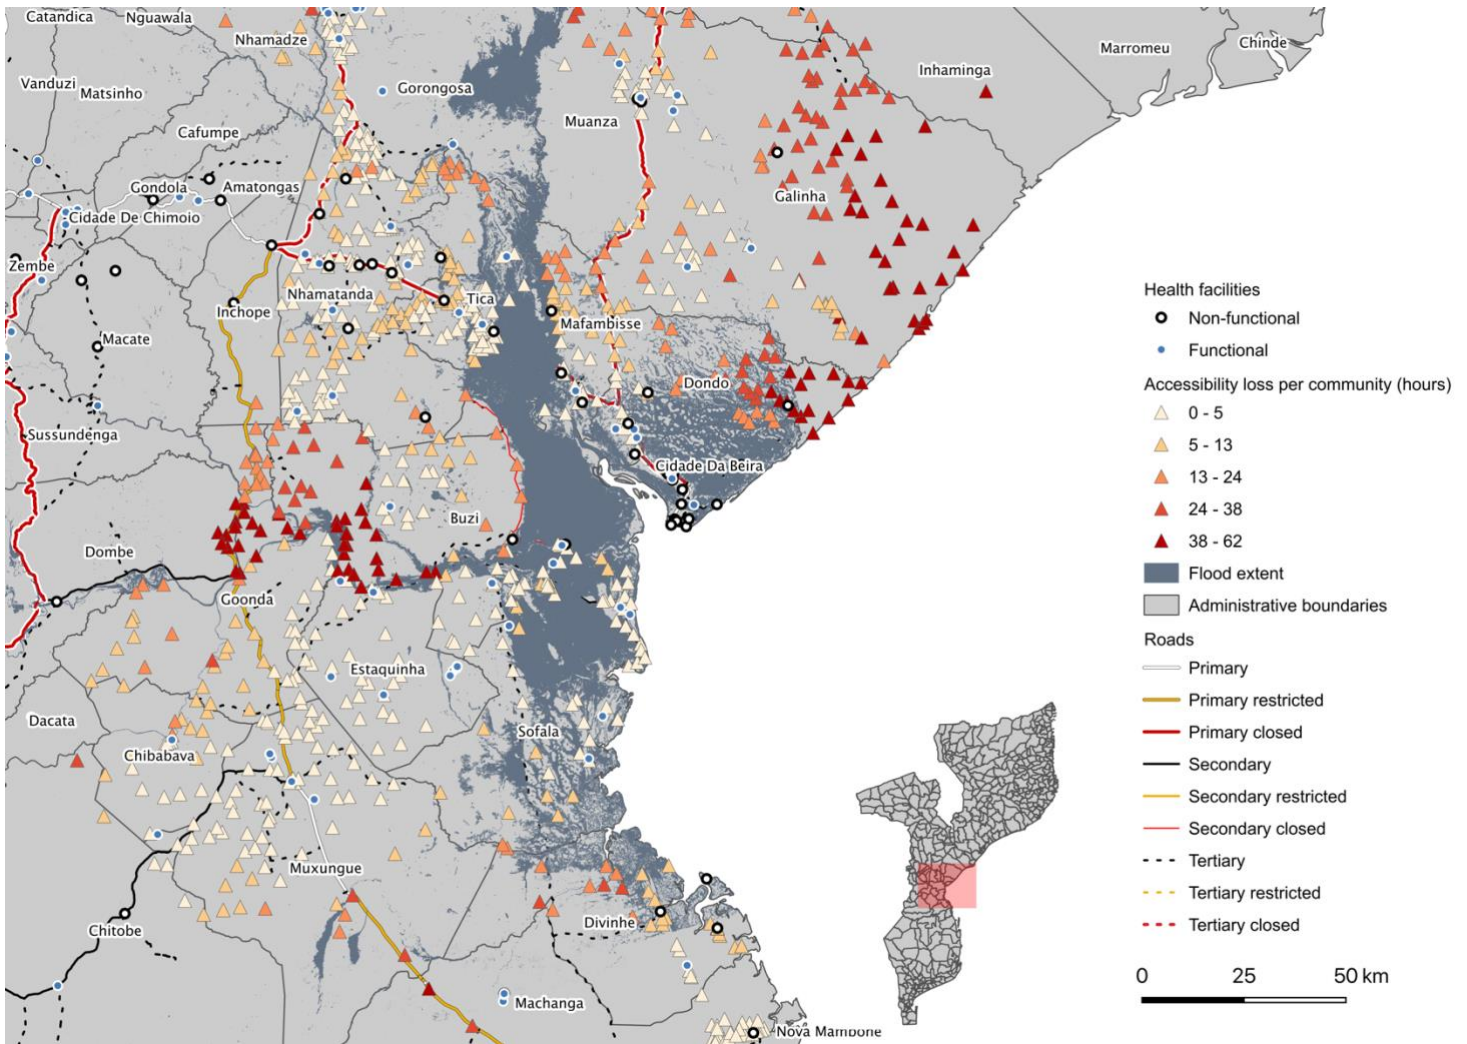

Supplement: bmjopen-2020-039138.draft_revisions.pdf [file bmjopen-2020-039138.draft_revisions.pdf]
